# Supplementary material for: Structural transformation of methasterone with Cunninghamella blakesleeana and Macrophomina phaseolina
Source: Royal Society of Chemistry journal article supplement (doi:10.1039/d2ra01396g), 2022-01-01
Supplement: d2ra01396g1.pdf [file d2ra01396g1.pdf]

## Supplementary Information

### Structural Transformation of Methasterone with *Cunninghamella blakesleeana* and *Macrophomina phaseolina*

Muhammad Aamer <sup>a</sup>, Mahwish Siddiqui <sup>a</sup>, Almas Jabeen <sup>b</sup>, Rimsha Irshad <sup>a</sup>,  
Farooq-Ahmad Khan <sup>a,c</sup>, Atia-tul-Wahab <sup>b</sup>, M. Iqbal Choudhary <sup>a,b,d,\*</sup>, Yan Wang <sup>a,\*</sup>

<sup>a</sup> *H. E. J. Research Institute of Chemistry, International Center for Chemical and Biological Sciences,  
University of Karachi, Karachi-75270, Pakistan*

<sup>b</sup> *Dr. Panjwani Center for Molecular Medicine and Drug Research, International Center for Chemical  
and Biological Sciences, University of Karachi, Karachi-75270, Pakistan*

<sup>c</sup> *Third World Center (TWC) for Chemical Sciences, International Center for Chemical & Biological  
Sciences, University of Karachi-75270, Pakistan*

<sup>d</sup> *Department of Biochemistry, Faculty of Science, King Abdulaziz University, Jeddah-21589, Saudi  
Arabia*

\*Corresponding author

[yan.wang@iccs.edu](mailto:yan.wang@iccs.edu) (Y.W.); [iqbal.choudhary@iccs.edu](mailto:iqbal.choudhary@iccs.edu) (M.I.C.)

## Table of Contents

|                                                                                                     |    |
|-----------------------------------------------------------------------------------------------------|----|
| Figure S1. EI-MS spectrum of compound <b>1</b> .....                                                | 5  |
| Figure S2. <sup>1</sup> H NMR spectrum-1 of compound <b>1</b> (400 MHz, CD <sub>3</sub> OD) .....   | 6  |
| Figure S3. <sup>1</sup> H NMR spectrum-2 of compound <b>1</b> (400 MHz, CD <sub>3</sub> OD) .....   | 6  |
| Figure S4. <sup>13</sup> C NMR spectrum-1 of compound <b>1</b> (100 MHz, CD <sub>3</sub> OD) .....  | 7  |
| Figure S5. <sup>13</sup> C NMR spectrum-2 of compound <b>1</b> (100 MHz, CD <sub>3</sub> OD) .....  | 7  |
| Figure S6. EI-MS spectrum of compound <b>2</b> .....                                                | 8  |
| Figure S7. HREI-MS spectrum of compound <b>2</b> .....                                              | 8  |
| Figure S8. IR spectrum of compound <b>2</b> .....                                                   | 9  |
| Figure S9. <sup>1</sup> H NMR spectrum-1 of compound <b>2</b> (500 MHz, CD <sub>3</sub> OD) .....   | 9  |
| Figure S10. <sup>1</sup> H NMR spectrum-2 of compound <b>2</b> (500 MHz, CD <sub>3</sub> OD) .....  | 10 |
| Figure S11. <sup>13</sup> C NMR spectrum-1 of compound <b>2</b> (125 MHz, CD <sub>3</sub> OD) ..... | 10 |
| Figure S12. <sup>13</sup> C NMR spectrum-2 of compound <b>2</b> (125 MHz, CD <sub>3</sub> OD) ..... | 11 |
| Figure S13. DEPT spectrum of compound <b>2</b> .....                                                | 11 |
| Figure S14. <sup>1</sup> H- <sup>1</sup> H COSY spectrum of compound <b>2</b> .....                 | 12 |
| Figure S15. HSQC spectrum of compound <b>2</b> .....                                                | 12 |
| Figure S16. HMBC spectrum-1 of compound <b>2</b> .....                                              | 13 |
| Figure S17. HMBC spectrum-2 of compound <b>2</b> .....                                              | 13 |
| Figure S18. NOESY spectrum of compound <b>2</b> .....                                               | 14 |
| Figure S19. EI-MS spectrum of compound <b>3</b> .....                                               | 14 |
| Figure S20. HREI-MS spectrum of compound <b>3</b> .....                                             | 15 |
| Figure S21. IR spectrum of compound <b>3</b> .....                                                  | 15 |
| Figure S22. <sup>1</sup> H NMR spectrum-1 of compound <b>3</b> (500 MHz, CD <sub>3</sub> OD) .....  | 16 |
| Figure S23. <sup>1</sup> H NMR spectrum-2 of compound <b>3</b> (500 MHz, CD <sub>3</sub> OD) .....  | 16 |
| Figure S24. <sup>13</sup> C NMR spectrum-1 of compound <b>3</b> (125 MHz, CD <sub>3</sub> OD) ..... | 17 |
| Figure S25. <sup>13</sup> C NMR spectrum-2 of compound <b>3</b> (125 MHz, CD <sub>3</sub> OD) ..... | 17 |
| Figure S26. DEPT spectrum of compound <b>3</b> .....                                                | 18 |
| Figure S27. <sup>1</sup> H- <sup>1</sup> H COSY spectrum of compound <b>3</b> .....                 | 18 |
| Figure S28. HSQC spectrum-1 of compound <b>3</b> .....                                              | 19 |
| Figure S29. HSQC spectrum-2 of compound <b>3</b> .....                                              | 19 |
| Figure S30. HMBC spectrum-1 of compound <b>3</b> .....                                              | 20 |
| Figure S31. HMBC spectrum-2 of compound <b>3</b> .....                                              | 20 |
| Figure S32. NOESY spectrum of compound <b>3</b> .....                                               | 21 |

|                                                                                                     |    |
|-----------------------------------------------------------------------------------------------------|----|
| Figure S33. EI-MS spectrum of compound <b>4</b> .....                                               | 21 |
| Figure S34. HREI-MS spectrum of compound <b>4</b> .....                                             | 22 |
| Figure S35. IR spectrum of compound <b>4</b> .....                                                  | 22 |
| Figure S36. <sup>1</sup> H NMR spectrum-1 of compound <b>4</b> (500 MHz, CD <sub>3</sub> OD) .....  | 23 |
| Figure S37. <sup>1</sup> H NMR spectrum-2 of compound <b>4</b> (500 MHz, CD <sub>3</sub> OD) .....  | 23 |
| Figure S38. <sup>1</sup> H NMR spectrum-3 of compound <b>4</b> (500 MHz, CD <sub>3</sub> OD) .....  | 24 |
| Figure S39. <sup>13</sup> C NMR spectrum-1 of compound <b>4</b> (125 MHz, CD <sub>3</sub> OD) ..... | 24 |
| Figure S40. <sup>13</sup> C NMR spectrum-2 of compound <b>4</b> (125 MHz, CD <sub>3</sub> OD) ..... | 25 |
| Figure S41. DEPT spectrum of compound <b>4</b> .....                                                | 25 |
| Figure S42. <sup>1</sup> H- <sup>1</sup> H COSY spectrum of compound <b>4</b> .....                 | 26 |
| Figure S43. HSQC spectrum of compound <b>4</b> .....                                                | 26 |
| Figure S44. HMBC spectrum-1 of compound <b>4</b> .....                                              | 27 |
| Figure S45. HMBC spectrum-2 of compound <b>4</b> .....                                              | 27 |
| Figure S46. NOESY spectrum of compound <b>4</b> .....                                               | 28 |
| Figure S47. EI-MS spectrum of compound <b>5</b> .....                                               | 28 |
| Figure S48. HREI-MS spectrum of compound <b>5</b> .....                                             | 29 |
| Figure S49. IR spectrum of compound <b>5</b> .....                                                  | 29 |
| Figure S50. <sup>1</sup> H NMR spectrum-1 of compound <b>5</b> (400 MHz, CD <sub>3</sub> OD) .....  | 30 |
| Figure S51. <sup>1</sup> H NMR spectrum-2 of compound <b>5</b> (400 MHz, CD <sub>3</sub> OD) .....  | 30 |
| Figure S52. <sup>13</sup> C NMR spectrum-1 of compound <b>5</b> (100 MHz, CD <sub>3</sub> OD) ..... | 31 |
| Figure S53. <sup>13</sup> C NMR spectrum-2 of compound <b>5</b> (100 MHz, CD <sub>3</sub> OD) ..... | 31 |
| Figure S54. DEPT spectrum of compound <b>5</b> .....                                                | 32 |
| Figure S55. <sup>1</sup> H- <sup>1</sup> H COSY spectrum-1 of compound <b>5</b> .....               | 32 |
| Figure S56. <sup>1</sup> H- <sup>1</sup> H COSY spectrum-2 of compound <b>5</b> .....               | 33 |
| Figure S57. HSQC spectrum-1 of compound <b>5</b> .....                                              | 33 |
| Figure S58. HSQC spectrum-2 of compound <b>5</b> .....                                              | 34 |
| Figure S59. HMBC spectrum-1 of compound <b>5</b> .....                                              | 34 |
| Figure S60. HMBC spectrum-2 of compound <b>5</b> .....                                              | 35 |
| Figure S61. NOESY spectrum-1 of compound <b>5</b> .....                                             | 35 |
| Figure S62. NOESY spectrum-2 of compound <b>5</b> .....                                             | 36 |
| Figure S63. EI-MS spectrum of compound <b>6</b> .....                                               | 36 |
| Figure S64. <sup>1</sup> H NMR spectrum-1 of compound <b>6</b> (400 MHz, CD <sub>3</sub> OD) .....  | 37 |
| Figure S65. <sup>1</sup> H NMR spectrum-2 of compound <b>6</b> (400 MHz, CD <sub>3</sub> OD) .....  | 37 |

|                                                                                                          |    |
|----------------------------------------------------------------------------------------------------------|----|
| Figure S66. $^{13}\text{C}$ NMR spectrum-1 of compound <b>6</b> (125 MHz, $\text{CD}_3\text{OD}$ ) ..... | 38 |
| Figure S67. $^{13}\text{C}$ NMR spectrum-2 of compound <b>6</b> (125 MHz, $\text{CD}_3\text{OD}$ ) ..... | 38 |
| Figure S68. EI-MS spectrum of compound <b>7</b> .....                                                    | 39 |
| Figure S69. HREI-MS spectrum of compound <b>7</b> .....                                                  | 40 |
| Figure S70. IR spectrum of compound <b>7</b> .....                                                       | 41 |
| Figure S71. $^1\text{H}$ NMR spectrum-1 of compound <b>7</b> (400 MHz, $\text{CD}_3\text{OD}$ ) .....    | 41 |
| Figure S72. $^1\text{H}$ NMR spectrum-2 of compound <b>7</b> (400 MHz, $\text{CD}_3\text{OD}$ ) .....    | 42 |
| Figure S73. $^{13}\text{C}$ NMR spectrum-1 of compound <b>7</b> (100 MHz, $\text{CD}_3\text{OD}$ ) ..... | 42 |
| Figure S74. $^{13}\text{C}$ NMR spectrum-2 of compound <b>7</b> (100 MHz, $\text{CD}_3\text{OD}$ ) ..... | 43 |
| Figure S75. DEPT spectrum of compound <b>7</b> .....                                                     | 43 |
| Figure S76. $^1\text{H}$ - $^1\text{H}$ COSY spectrum of compound <b>7</b> .....                         | 44 |
| Figure S77. HSQC spectrum of compound <b>7</b> .....                                                     | 44 |
| Figure S78. HMBC spectrum-1 of compound <b>7</b> .....                                                   | 45 |
| Figure S79. HMBC spectrum-2 of compound <b>7</b> .....                                                   | 45 |
| Figure S80. NOESY spectrum of compound <b>7</b> .....                                                    | 46 |

HEJ-ICCBS  
2/26/2019 2:57:34 PM

File: MST-1  
Sample: DR. YAN WANG /DR. IQBAL  
Instrument: JEOL JMS600H-1

Date Run: 02-26-2019 (Time Run: 14:18:15)

Ionization mode: EI+

Run By: HEJ-104

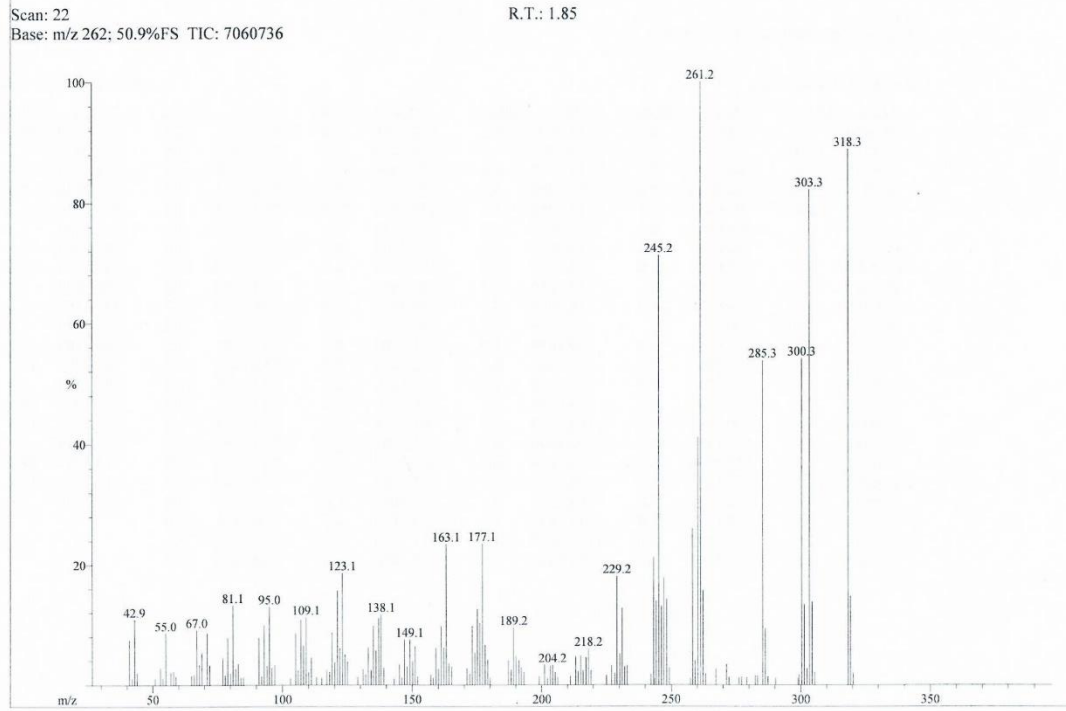

Figure S1. EI-MS spectrum of compound **1**

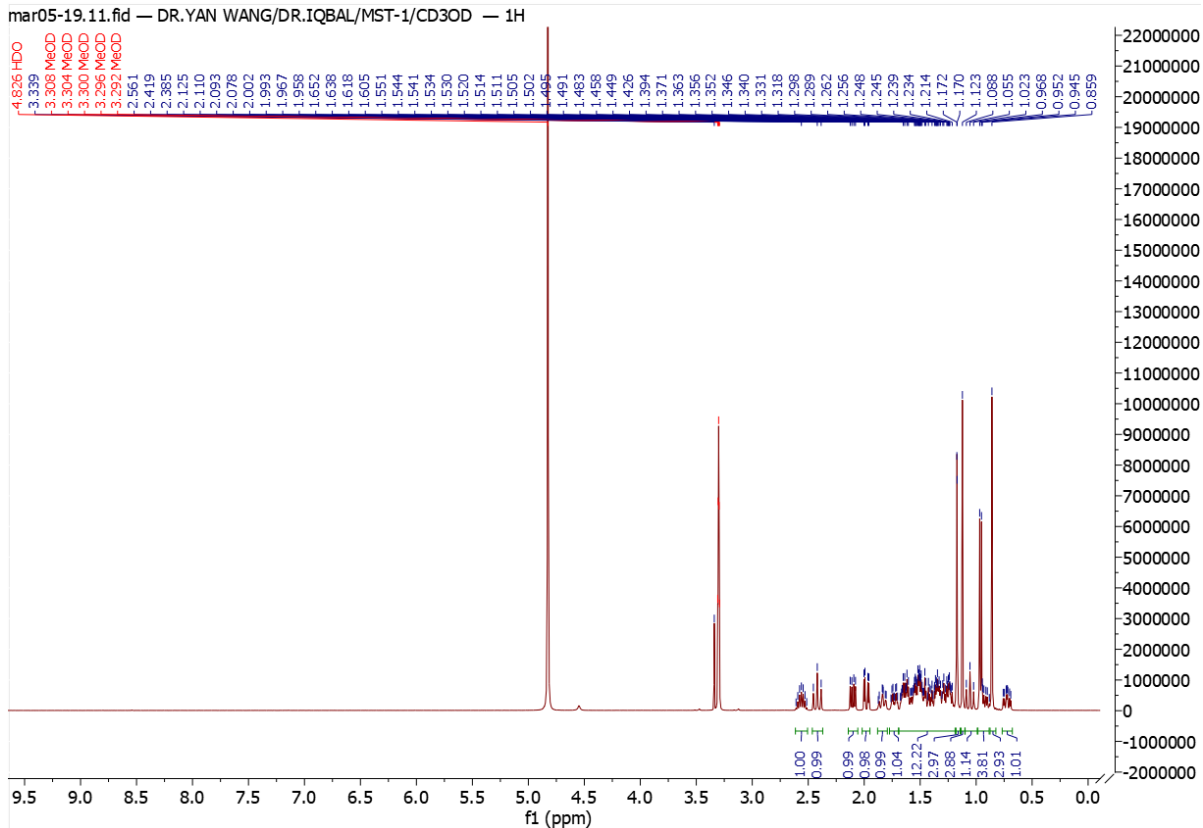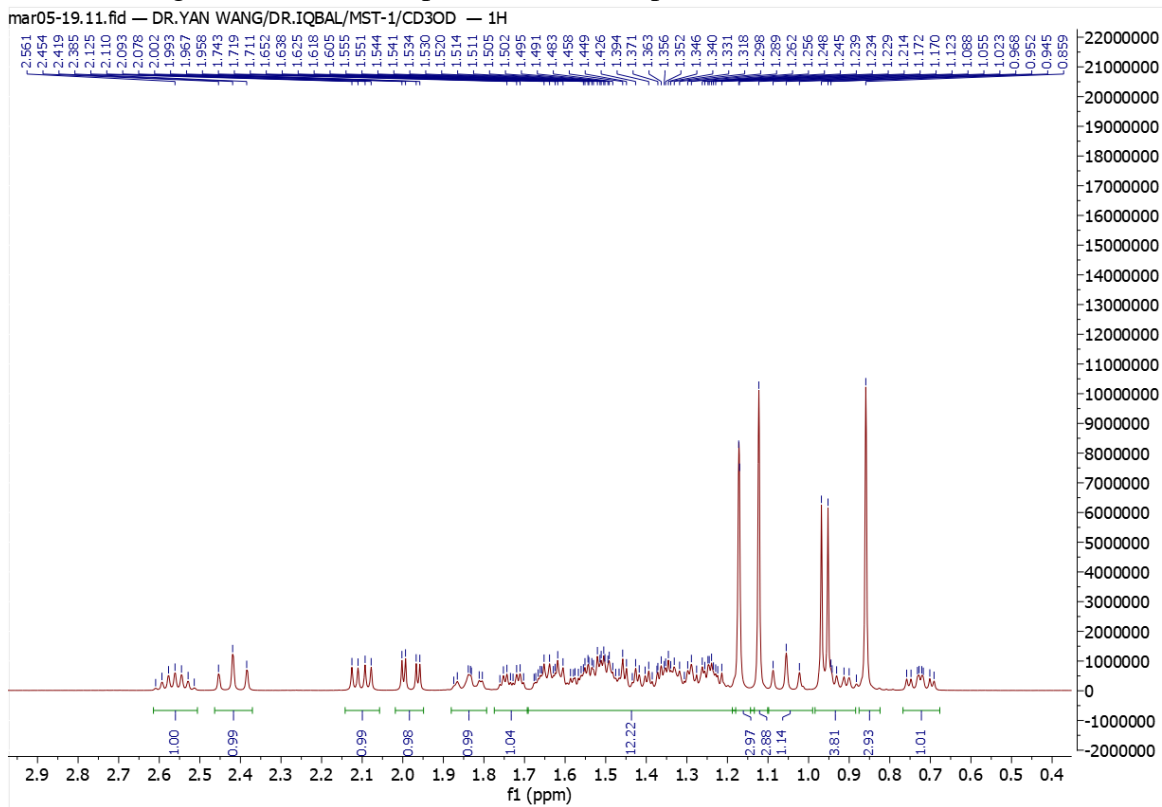

mar06-19.5.fid — DR.YAN WANG/DR.IQBAL/MST-1/CD3OD — BB/

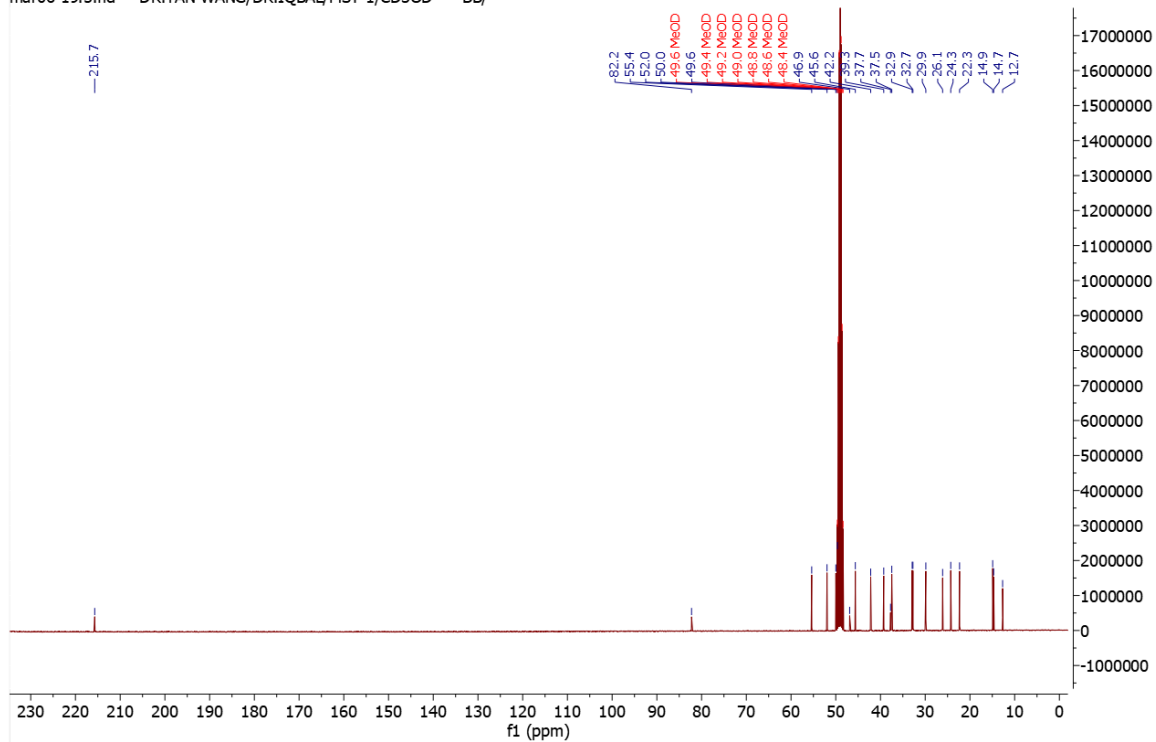

Figure S4.  $^{13}\text{C}$  NMR spectrum-1 of compound **1** (100 MHz,  $\text{CD}_3\text{OD}$ )

mar06-19.5.fid — DR.YAN WANG/DR.IQBAL/MST-1/CD3OD — BB/

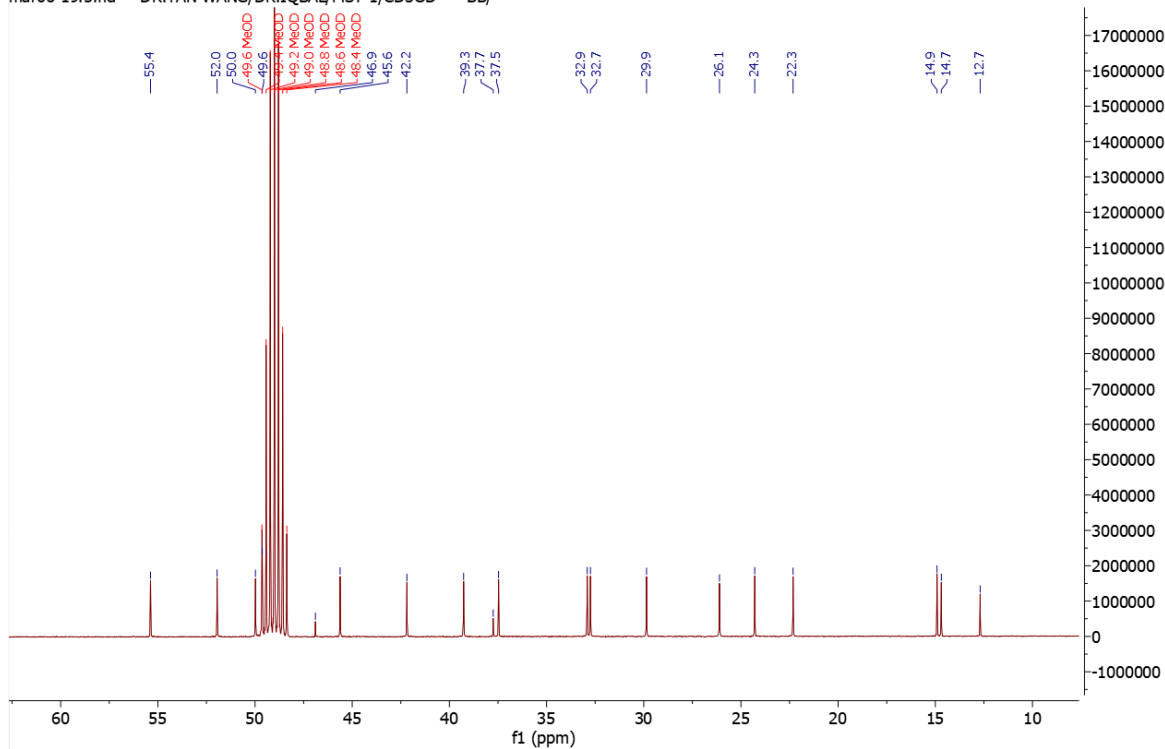

Figure S5.  $^{13}\text{C}$  NMR spectrum-2 of compound **1** (100 MHz,  $\text{CD}_3\text{OD}$ )

File: MST-37  
Sample: M.AAMER /DR. YANWANG  
Instrument: JEOL 600H-1  
Inlet: Direct Probe

Date Run: 11-16-2020 (Time Run: 10:13:59)

Ionization mode: EI+

Run By: MASS LAB-104

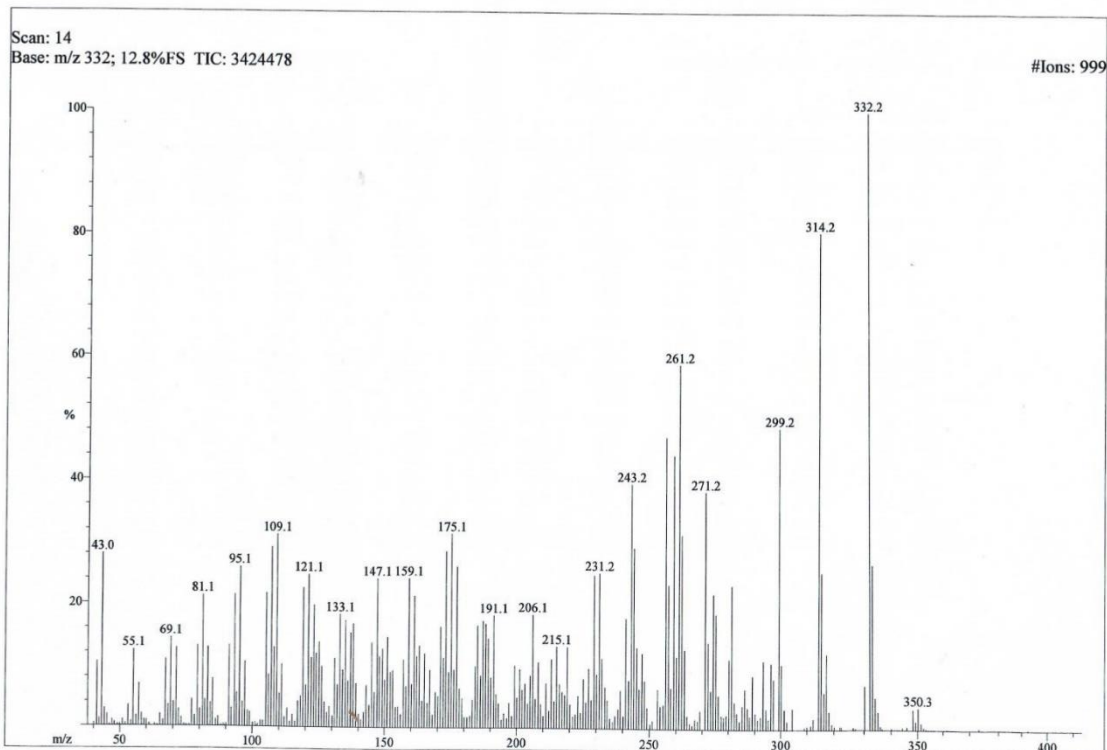

Figure S6. EI-MS spectrum of compound 2

| Mass     | Relative Intensity | Theoretical Mass | Delta [ppm] | Delta [mmu] | RDB  | Composition                                    |
|----------|--------------------|------------------|-------------|-------------|------|------------------------------------------------|
|          |                    | 317.2328         | -32.5       | -10.3       | 1.5  | C <sub>17</sub> H <sub>33</sub> O <sub>7</sub> |
|          |                    | 317.2117         | 34.1        | 10.8        | 6.5  | C <sub>20</sub> H <sub>29</sub> O <sub>3</sub> |
| 318.2226 | 5.8                | 318.2195         | 9.9         | 3.1         | 6.0  | C <sub>20</sub> H <sub>30</sub> O <sub>3</sub> |
| 319.2213 | 1.4                | 319.2273         | -18.8       | -6.0        | 5.5  | C <sub>20</sub> H <sub>31</sub> O <sub>3</sub> |
|          |                    | 319.2121         | 29.0        | 9.2         | 1.5  | C <sub>16</sub> H <sub>31</sub> O <sub>6</sub> |
| 328.2129 | 0.4                | 328.2191         | -18.9       | -6.2        | 12.0 | C <sub>25</sub> H <sub>29</sub>                |
|          |                    | 328.2038         | 27.6        | 9.0         | 8.0  | C <sub>25</sub> H <sub>28</sub> O <sub>3</sub> |
| 330.2158 | 3.3                | 330.2195         | -11.2       | -3.7        | 7.0  | C <sub>21</sub> H <sub>30</sub> O <sub>3</sub> |
|          |                    | 330.2042         | 35.0        | 11.6        | 3.0  | C <sub>17</sub> H <sub>30</sub> O <sub>6</sub> |
| 331.2244 | 1.4                | 331.2273         | -8.6        | -2.9        | 6.5  | C <sub>21</sub> H <sub>31</sub> O <sub>3</sub> |
| 332.2309 | 100.0              | 332.2351         | -12.7       | -4.2        | 6.0  | C <sub>21</sub> H <sub>32</sub> O <sub>3</sub> |
|          |                    | 332.2199         | 33.3        | 11.1        | 2.0  | C <sub>17</sub> H <sub>32</sub> O <sub>6</sub> |
| 333.2349 | 25.4               | 333.2277         | 21.6        | 7.2         | 1.5  | C <sub>17</sub> H <sub>33</sub> O <sub>6</sub> |
|          |                    | 333.2430         | -24.2       | -8.1        | 5.5  | C <sub>21</sub> H <sub>33</sub> O <sub>3</sub> |
| 333.3495 | 0.3                | 333.3521         | -8.0        | -2.7        | 2.5  | C <sub>24</sub> H <sub>15</sub>                |
| 333.3630 | 0.3                | 333.3521         | 32.6        | 10.9        | 2.5  | C <sub>24</sub> H <sub>15</sub>                |
| 334.2415 | 3.6                | 334.2355         | 17.9        | 6.0         | 1.0  | C <sub>24</sub> H <sub>15</sub> O <sub>6</sub> |
|          |                    | 334.2508         | -27.8       | -9.3        | 5.0  | C <sub>17</sub> H <sub>34</sub> O <sub>3</sub> |
| 335.2239 | 2.8                | 335.2222         | 4.9         | 1.6         | 5.5  | C <sub>20</sub> H <sub>31</sub> O <sub>4</sub> |
| 336.2248 | 0.7                | 336.2301         | -15.7       | -5.3        | 5.0  | C <sub>20</sub> H <sub>32</sub> O <sub>4</sub> |
|          |                    | 336.2148         | 29.7        | 10.0        | 1.0  | C <sub>16</sub> H <sub>32</sub> O <sub>7</sub> |
| 346.2202 | 0.5                | 346.2144         | 16.6        | 5.7         | 7.0  | C <sub>21</sub> H <sub>30</sub> O <sub>4</sub> |
|          |                    | 346.2297         | -27.5       | -9.5        | 11.0 | C <sub>25</sub> H <sub>30</sub> O <sub>1</sub> |
| 348.2285 | 1.3                | 348.2301         | -4.6        | -1.6        | 6.0  | C <sub>21</sub> H <sub>32</sub> O <sub>4</sub> |
| 349.2216 | 0.6                | 349.2226         | -3.1        | -1.1        | 1.5  | C <sub>17</sub> H <sub>33</sub> O <sub>7</sub> |
|          |                    | 349.2168         | 13.8        | 4.8         | 10.5 | C <sub>24</sub> H <sub>29</sub> O <sub>2</sub> |
| 350.2458 | 2.2                | 350.2457         | 0.4         | 0.1         | 5.0  | C <sub>21</sub> H <sub>34</sub> O <sub>1</sub> |
| 351.2543 | 0.5                | 351.2535         | 2.1         | 0.7         | 4.5  | C <sub>21</sub> H <sub>35</sub> O <sub>1</sub> |

MST-37

Figure S7. HREI-MS spectrum of compound 2





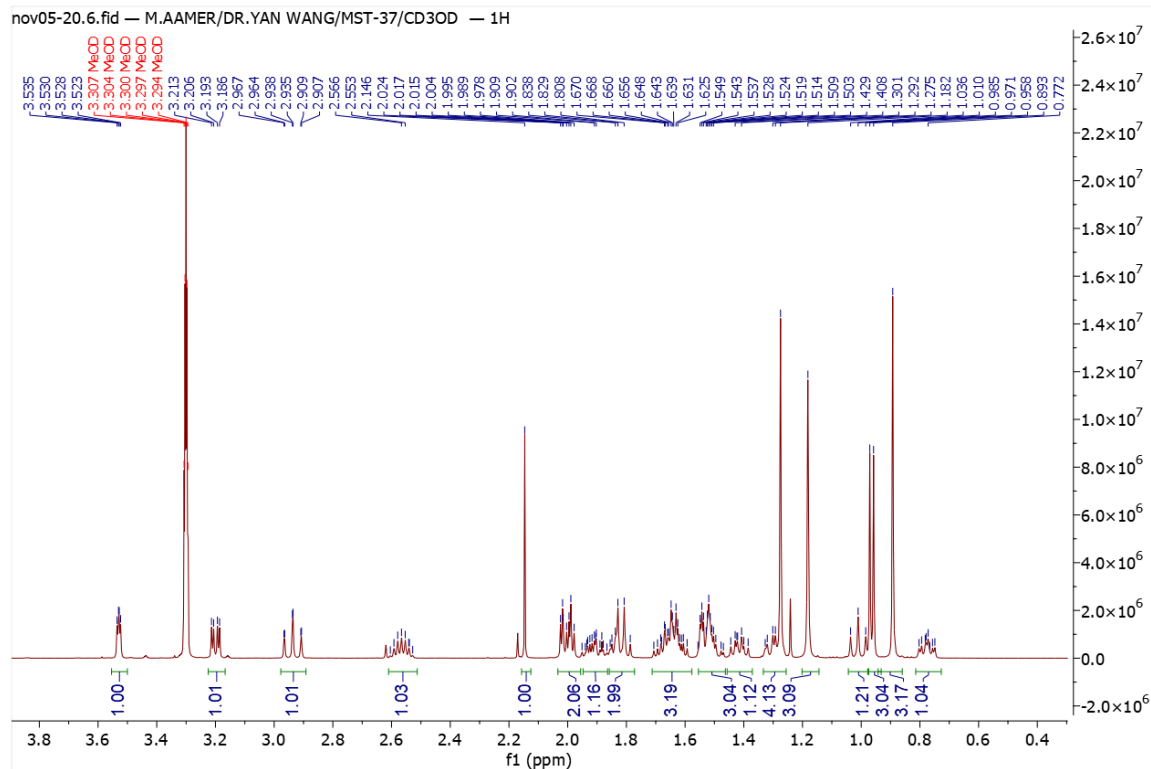

Figure S10.  $^1\text{H}$  NMR spectrum-2 of compound **2** (500 MHz,  $\text{CD}_3\text{OD}$ )

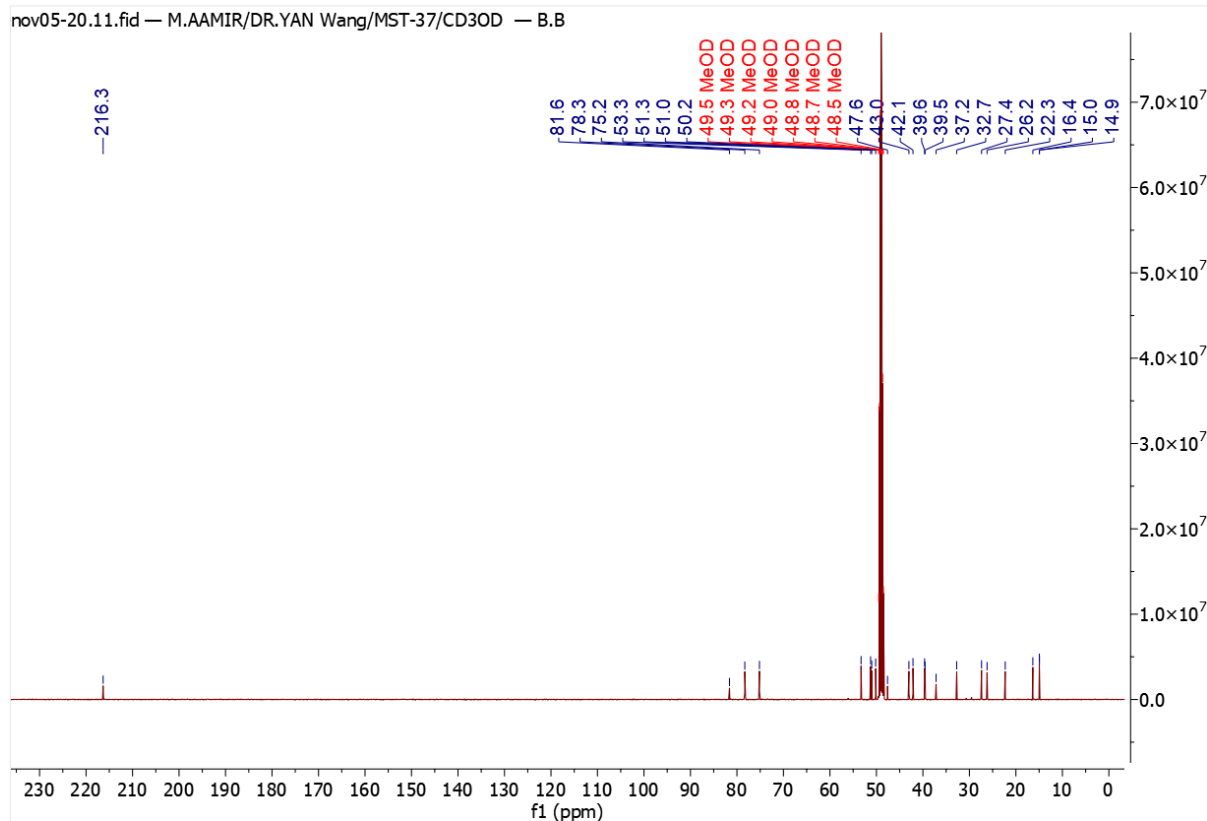

Figure S11.  $^{13}\text{C}$  NMR spectrum-1 of compound **2** (125 MHz,  $\text{CD}_3\text{OD}$ )

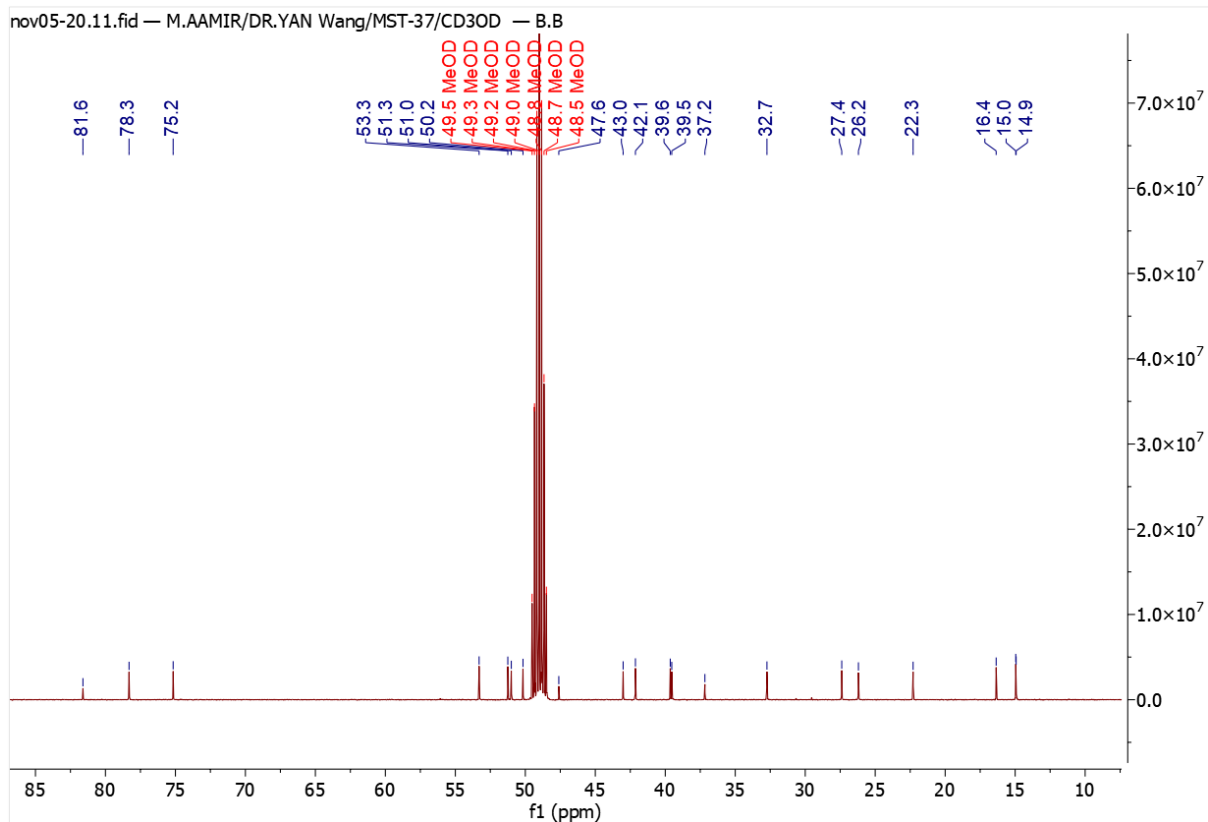

Figure S12.  $^{13}\text{C}$  NMR spectrum-2 of compound **2** (125 MHz,  $\text{CD}_3\text{OD}$ )

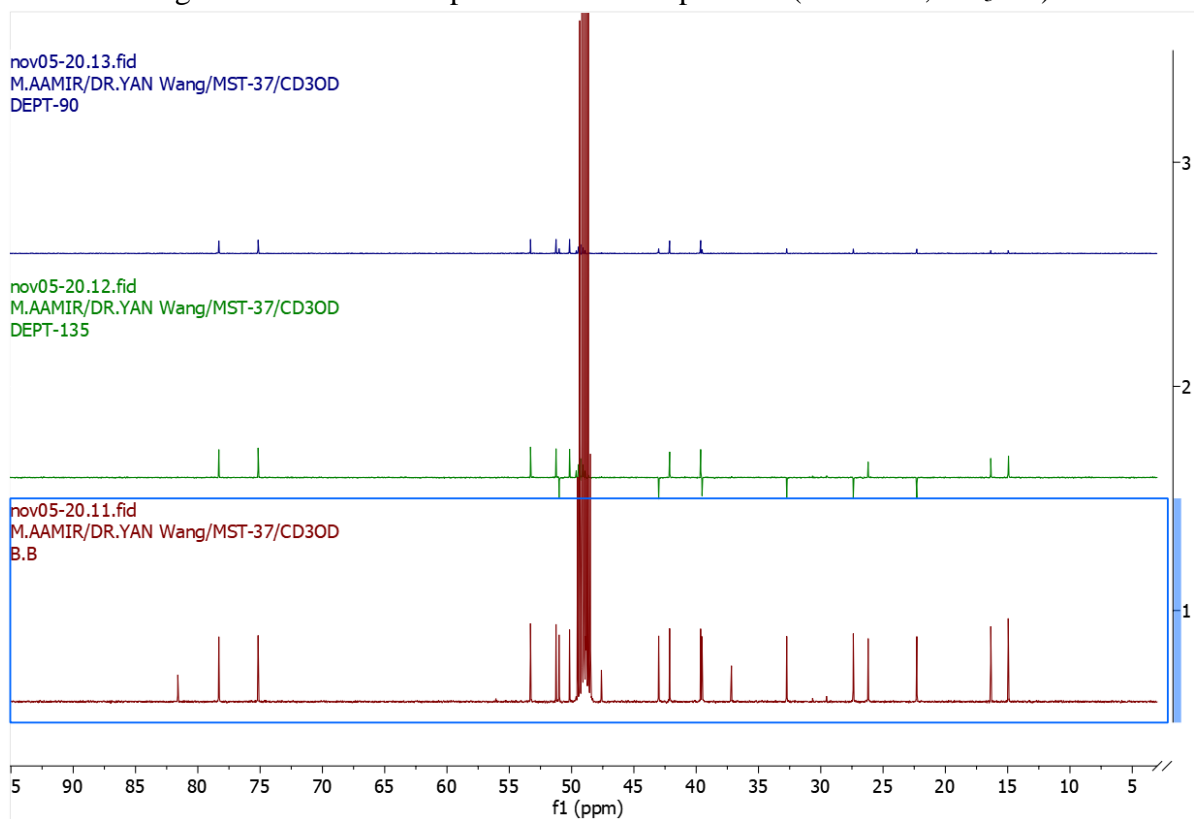

Figure S13. DEPT spectrum of compound **2**

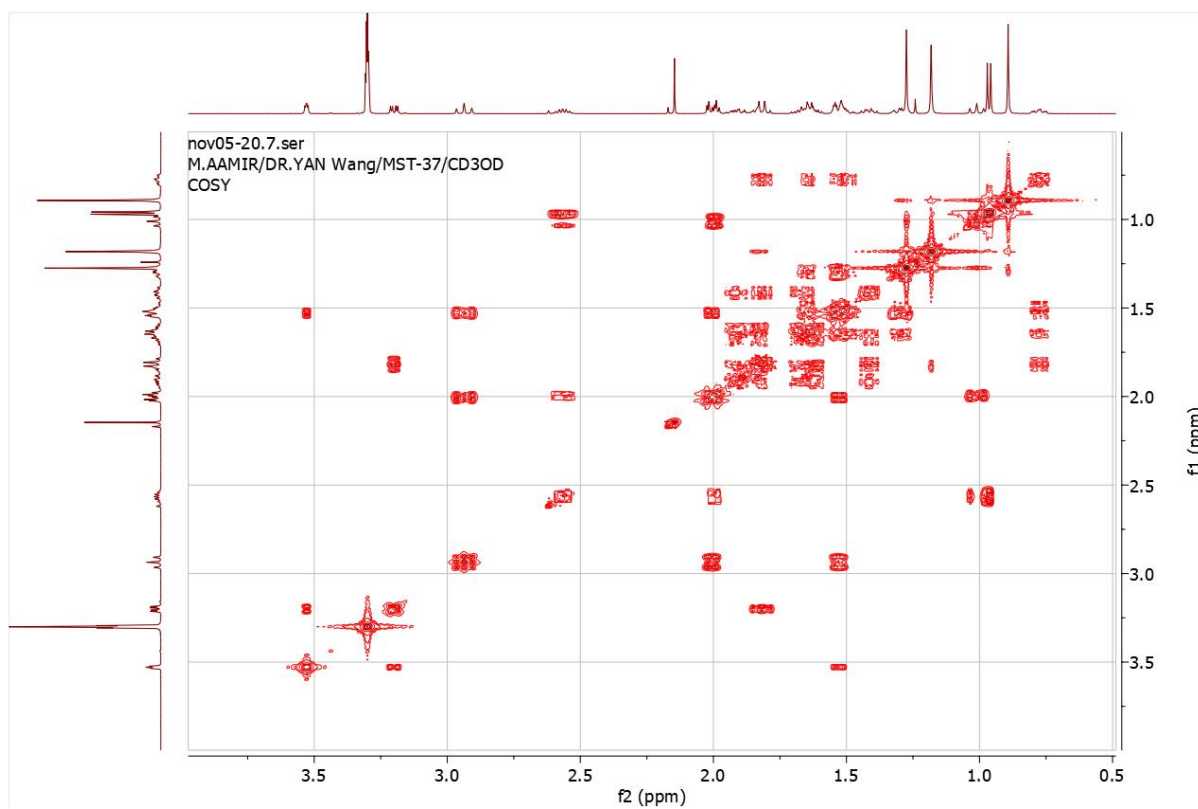

Figure S14. <sup>1</sup>H-<sup>1</sup>H COSY spectrum of compound **2**

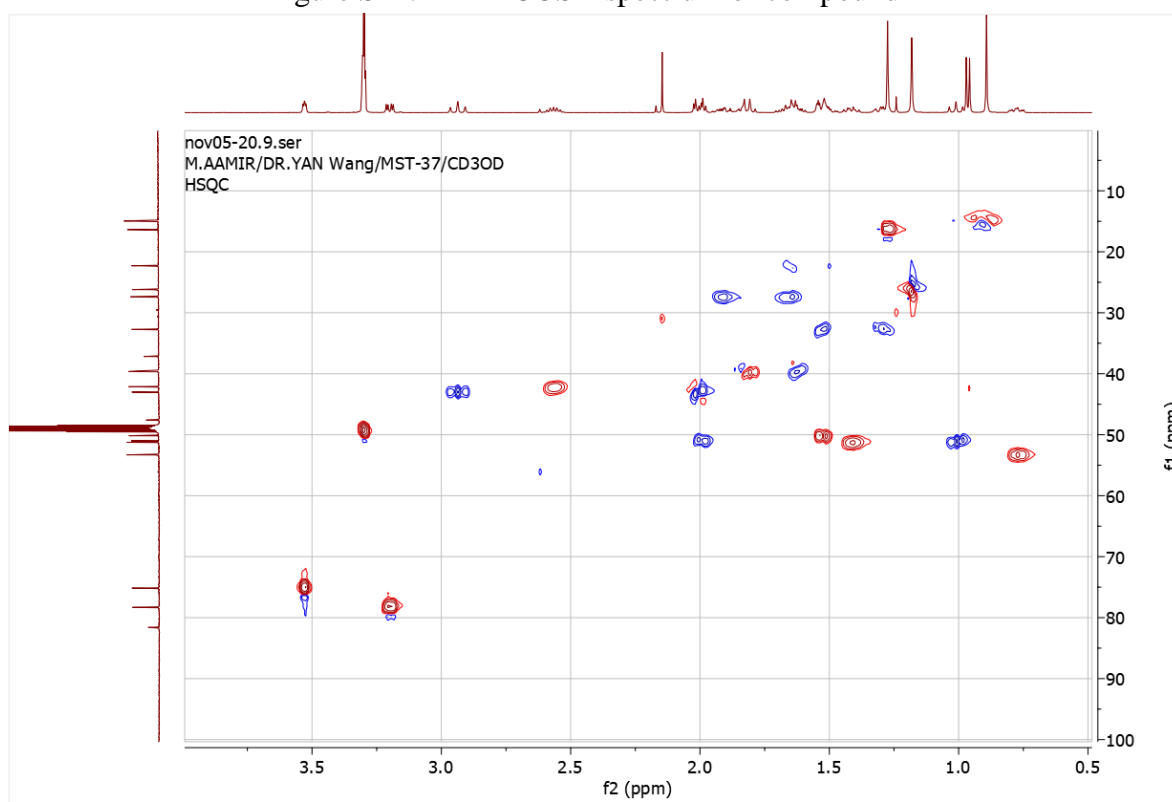

Figure S15. HSQC spectrum of compound **2**

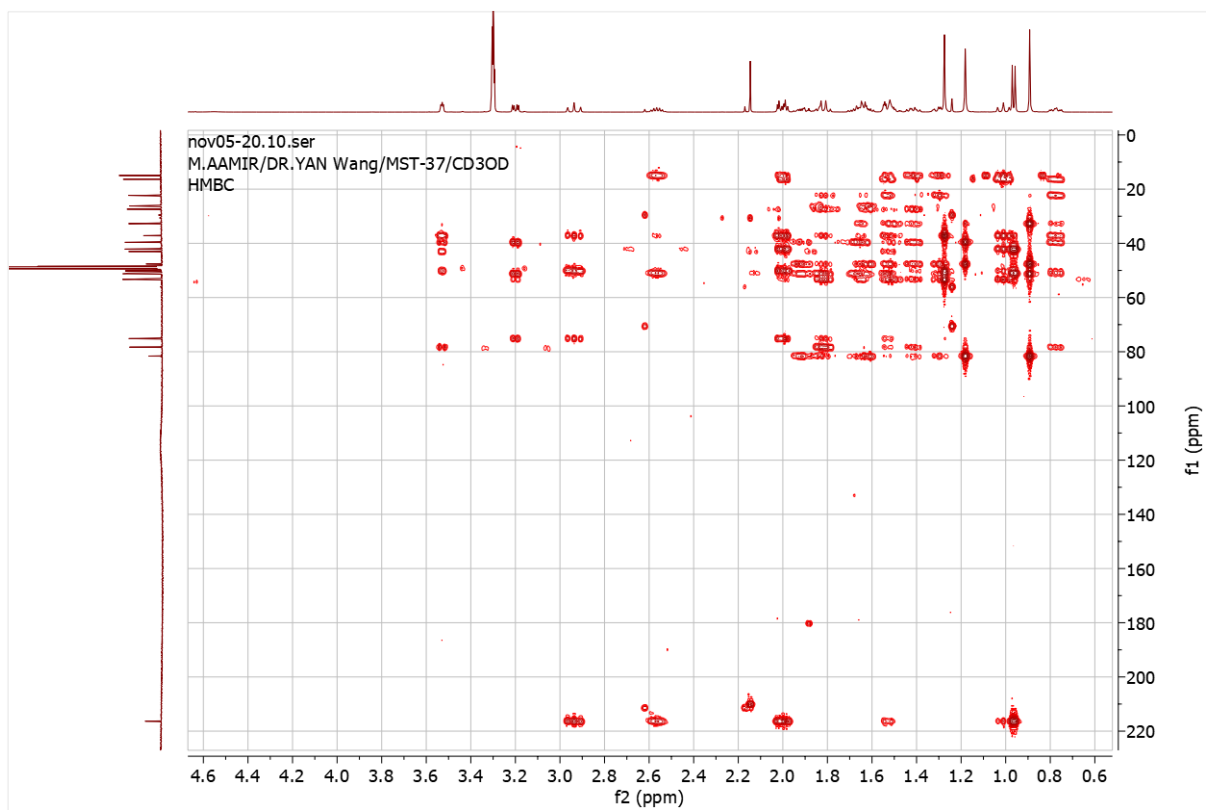

Figure S16. HMBC spectrum-1 of compound 2

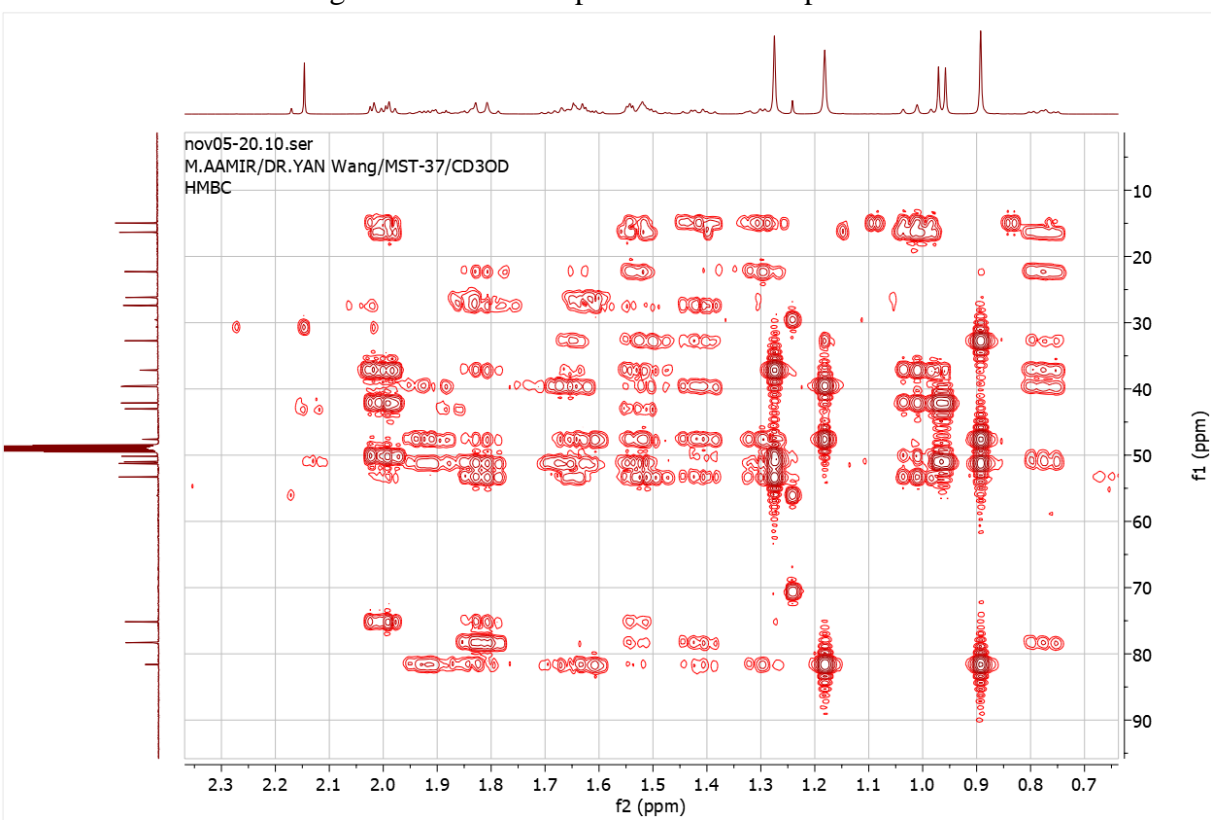

Figure S17. HMBC spectrum-2 of compound 2

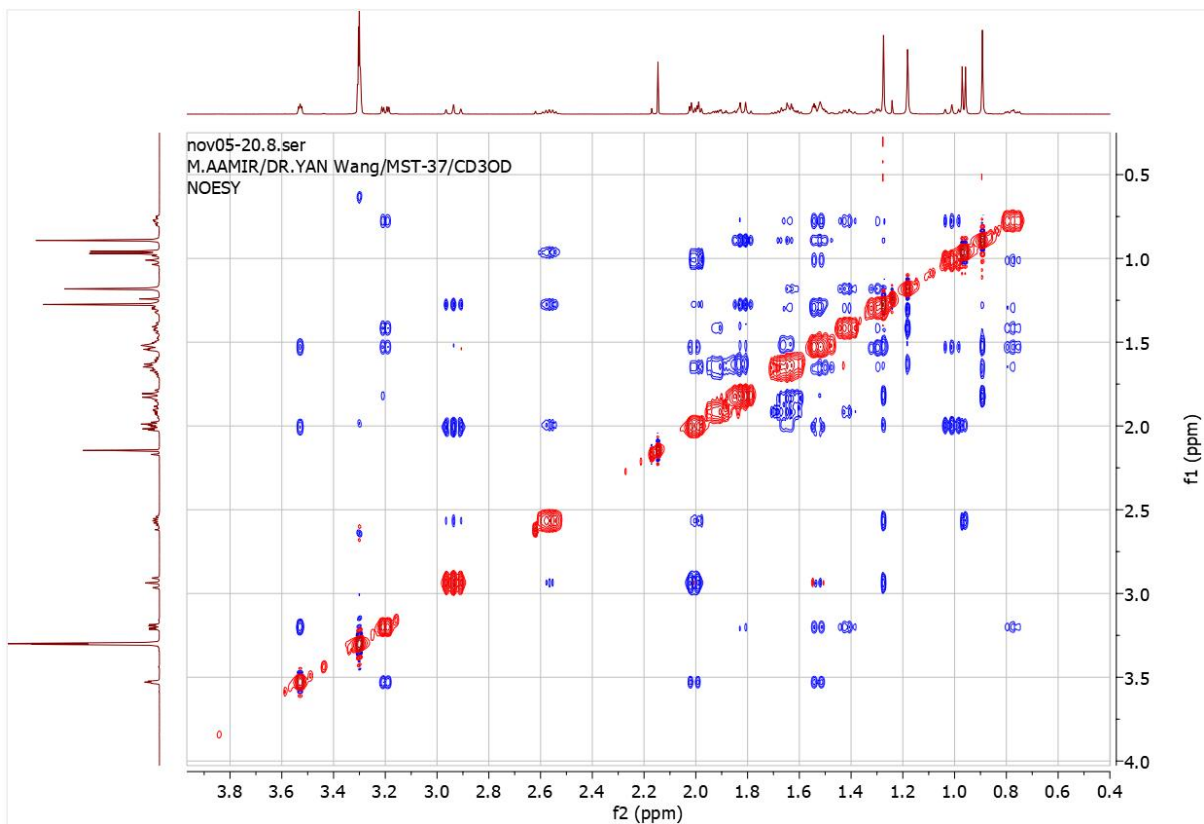

Figure S18. NOESY spectrum of compound 2

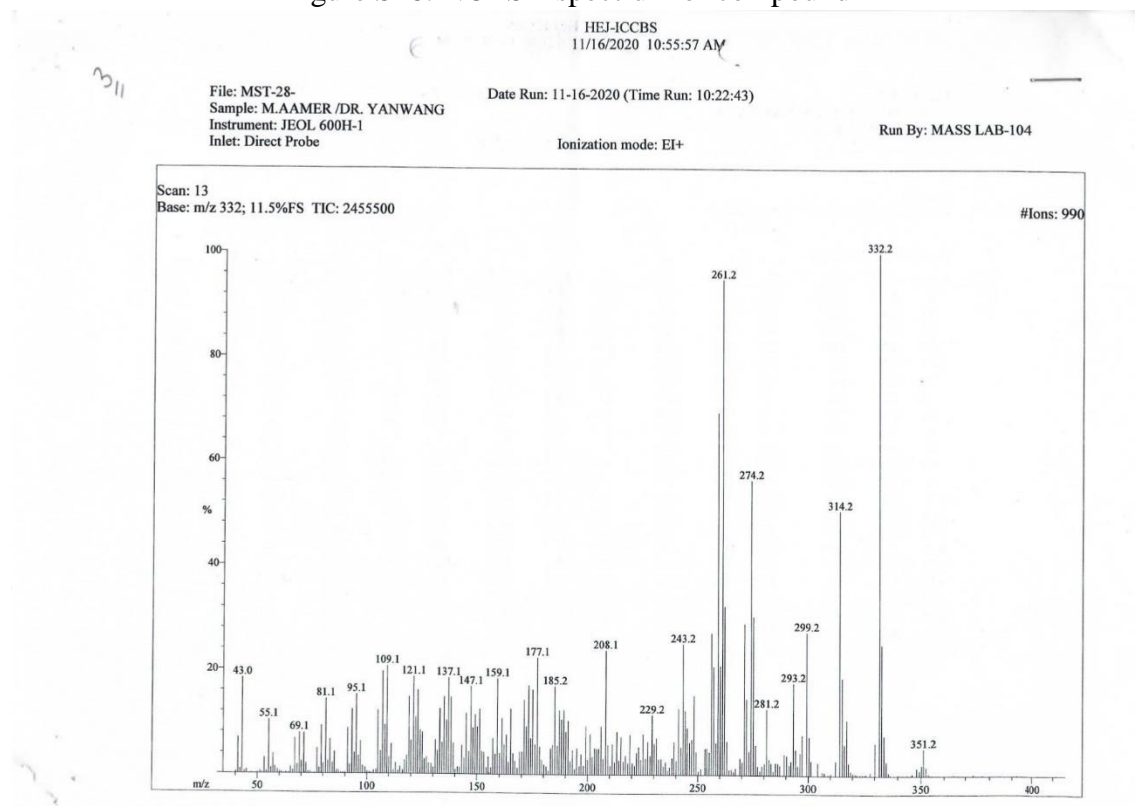

Figure S19. EI-MS spectrum of compound 3

| Mass     | Relative Intensity | Theoretical Mass | Delta [ppm] | Delta [mmu] | RDB  | Composition                                    |
|----------|--------------------|------------------|-------------|-------------|------|------------------------------------------------|
| 311.1819 | 0.3                | 310.1780         | 37.6        | 11.7        | 5.0  | C <sub>17</sub> H <sub>26</sub> O <sub>5</sub> |
|          |                    | 311.1800         | 6.1         | 1.9         | 13.5 | C <sub>24</sub> H <sub>23</sub>                |
|          |                    | 311.1858         | -12.8       | -4.0        | 4.5  | C <sub>17</sub> H <sub>27</sub> O <sub>5</sub> |
|          |                    | 311.1706         | 36.2        | 11.3        | 0.5  | C <sub>13</sub> H <sub>27</sub> O <sub>8</sub> |
| 312.2176 | 5.2                | 312.2089         | 27.6        | 8.6         | 8.0  | C <sub>21</sub> H <sub>28</sub> O <sub>2</sub> |
| 313.2085 | 3.3                | 313.2015         | 22.2        | 7.0         | 3.5  | C <sub>17</sub> H <sub>29</sub> O <sub>5</sub> |
|          |                    | 313.2168         | -26.5       | -8.3        | 7.5  | C <sub>21</sub> H <sub>25</sub> O <sub>2</sub> |
| 314.2246 | 72.9               | 314.2246         | 0.2         | 0.1         | 7.0  | C <sub>21</sub> H <sub>30</sub> O <sub>2</sub> |
| 315.2306 | 24.2               | 315.2324         | -5.6        | -1.8        | 6.5  | C <sub>21</sub> H <sub>31</sub> O <sub>2</sub> |
| 316.2345 | 6.8                | 316.2402         | -18.0       | -5.7        | 6.0  | C <sub>21</sub> H <sub>32</sub> O <sub>2</sub> |
|          |                    | 316.2250         | 30.3        | 9.6         | 2.0  | C <sub>17</sub> H <sub>32</sub> O <sub>3</sub> |
| 317.2109 | 51.1               | 317.2117         | -2.4        | -0.8        | 6.5  | C <sub>20</sub> H <sub>29</sub> O <sub>3</sub> |
| 318.2160 | 12.0               | 318.2195         | -11.0       | -3.5        | 6.0  | C <sub>20</sub> H <sub>30</sub> O <sub>3</sub> |
|          |                    | 318.2042         | 37.0        | 11.8        | 2.0  | C <sub>20</sub> H <sub>30</sub> O <sub>6</sub> |
| 319.2259 | 1.8                | 319.2273         | -4.6        | -1.5        | 5.5  | C <sub>16</sub> H <sub>30</sub> O <sub>5</sub> |
| 328.2148 | 0.8                | 328.2191         | -13.2       | -4.3        | 12.0 | C <sub>25</sub> H <sub>28</sub>                |
|          |                    | 328.2250         | -31.1       | -10.2       | 3.0  | C <sub>18</sub> H <sub>32</sub> O <sub>5</sub> |
|          |                    | 328.2038         | 33.3        | 10.9        | 8.0  | C <sub>21</sub> H <sub>28</sub> O <sub>3</sub> |
| 330.2241 | 7.6                | 330.2195         | 14.0        | 4.6         | 7.0  | C <sub>21</sub> H <sub>30</sub> O <sub>3</sub> |
|          |                    | 330.2348         | -32.2       | -10.6       | 11.0 | C <sub>25</sub> H <sub>30</sub>                |
| 331.2283 | 3.2                | 331.2273         | 2.9         | 1.0         | 6.5  | C <sub>21</sub> H <sub>31</sub> O <sub>3</sub> |
| 332.2345 | 61.6               | 332.2351         | -1.9        | -0.6        | 6.0  | C <sub>21</sub> H <sub>31</sub> O <sub>3</sub> |
| 333.2370 | 15.7               | 333.2430         | -17.8       | -5.9        | 5.5  | C <sub>21</sub> H <sub>33</sub> O <sub>3</sub> |
|          |                    | 333.2277         | 28.0        | 9.3         | 1.5  | C <sub>17</sub> H <sub>33</sub> O <sub>6</sub> |
| 334.2527 | 4.0                | 334.2508         | 5.6         | 1.9         | 5.0  | C <sub>21</sub> H <sub>34</sub> O <sub>2</sub> |
| 335.2445 | 1.0                | 335.2434         | 3.5         | 1.2         | 0.5  | C <sub>17</sub> H <sub>35</sub> O <sub>7</sub> |
|          |                    | 335.2375         | 21.0        | 7.0         | 9.5  | C <sub>17</sub> H <sub>35</sub> O <sub>7</sub> |
| 348.2103 | 1.0                | 348.2089         | 3.9         | 1.4         | 11.0 | C <sub>24</sub> H <sub>31</sub> O <sub>1</sub> |
|          |                    | 348.2148         | -13.0       | -4.5        | 2.0  | C <sub>24</sub> H <sub>31</sub> O <sub>2</sub> |
| 350.2439 | 0.5                | 350.2457         | -5.2        | -1.8        | 5.0  | C <sub>17</sub> H <sub>31</sub> O <sub>7</sub> |
|          |                    | 350.2305         | 38.3        | 13.4        | 1.0  | C <sub>21</sub> H <sub>34</sub> O <sub>4</sub> |
| 351.2530 | 0.3                | 351.2535         | -1.5        | -0.5        | 4.5  | C <sub>21</sub> H <sub>35</sub> O <sub>4</sub> |

MST-28

Activ  
Go to

Figure S20. HREI-MS spectrum of compound 3

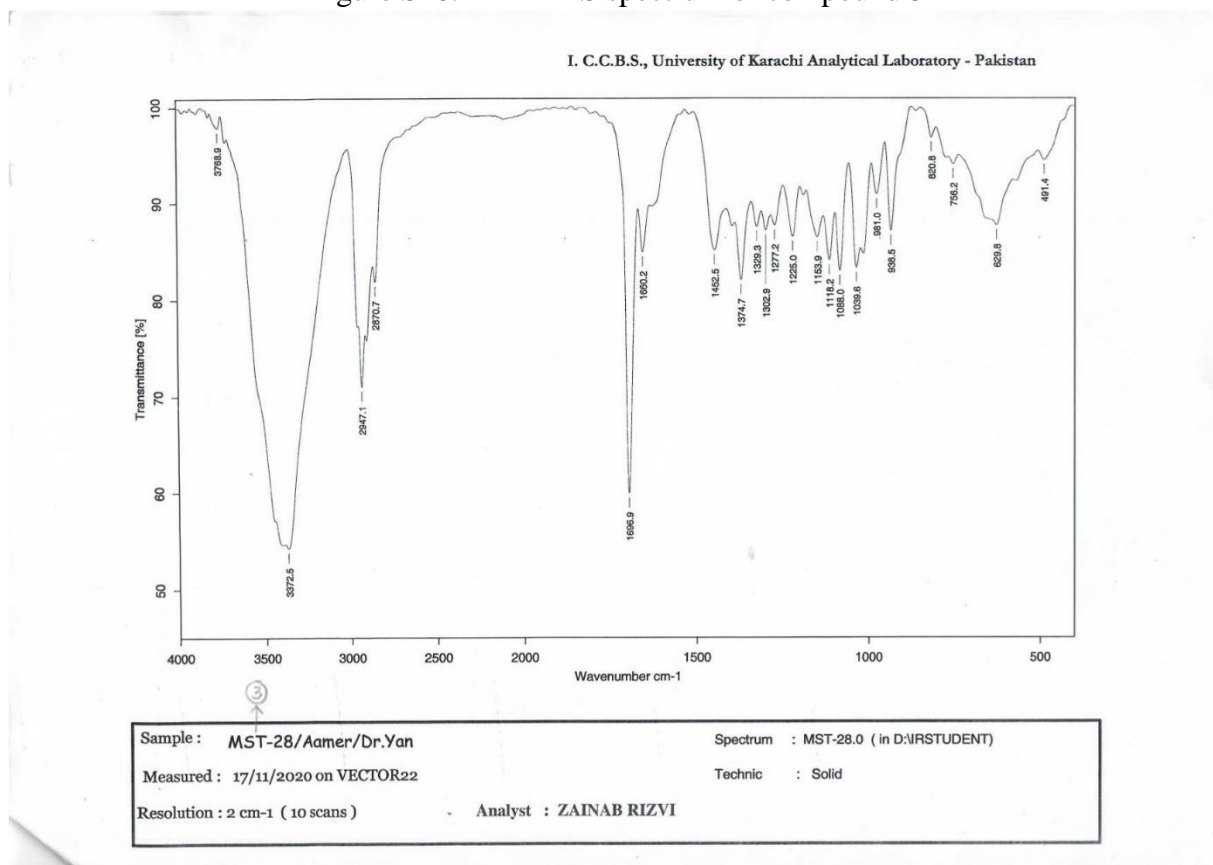

Figure S21. IR spectrum of compound 3

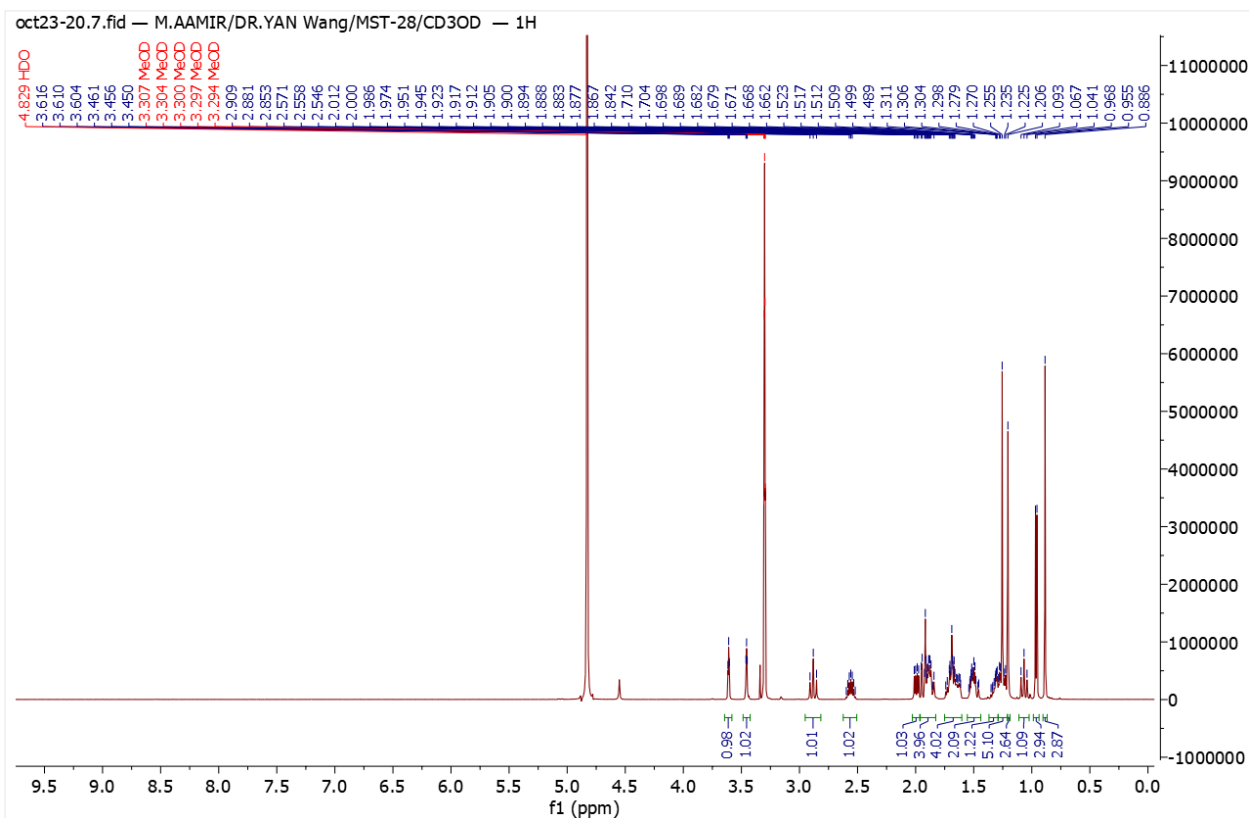

Figure S22. <sup>1</sup>H NMR spectrum-1 of compound **3** (500 MHz, CD<sub>3</sub>OD)

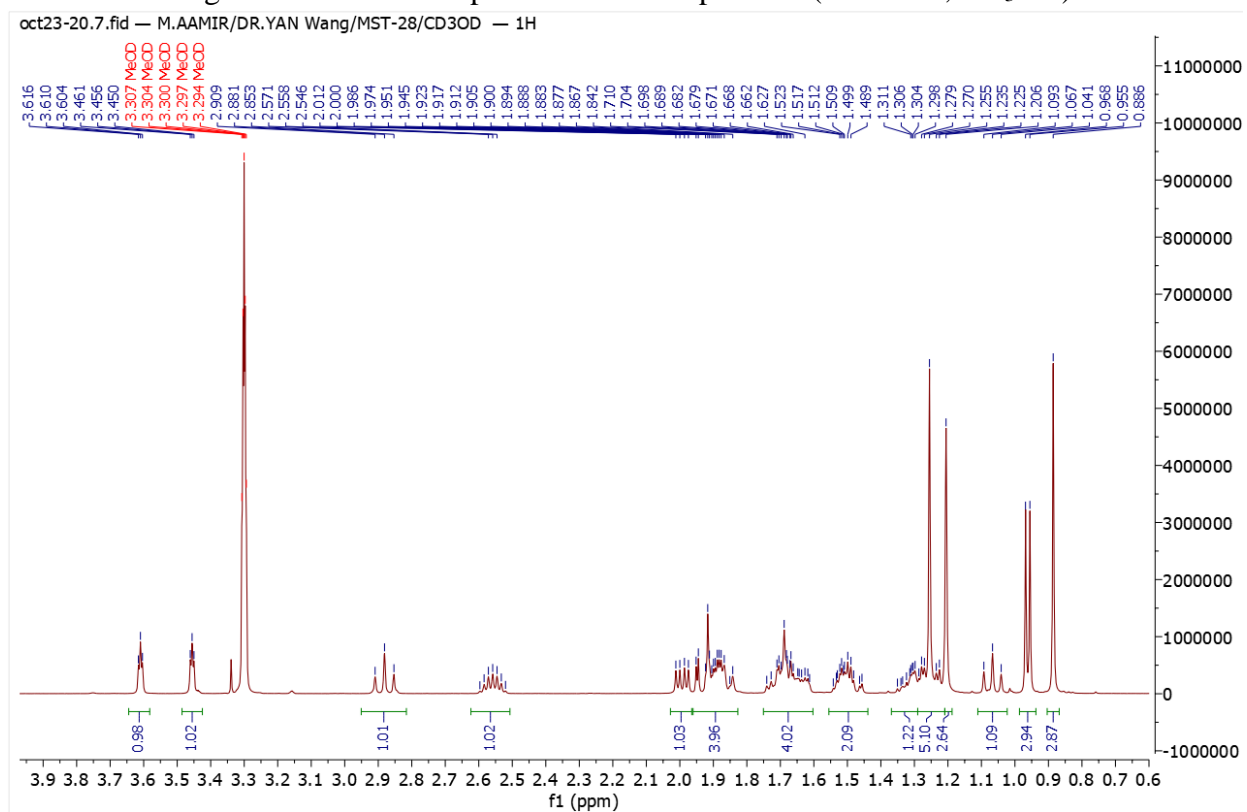

Figure S23. <sup>1</sup>H NMR spectrum-2 of compound **3** (500 MHz, CD<sub>3</sub>OD)



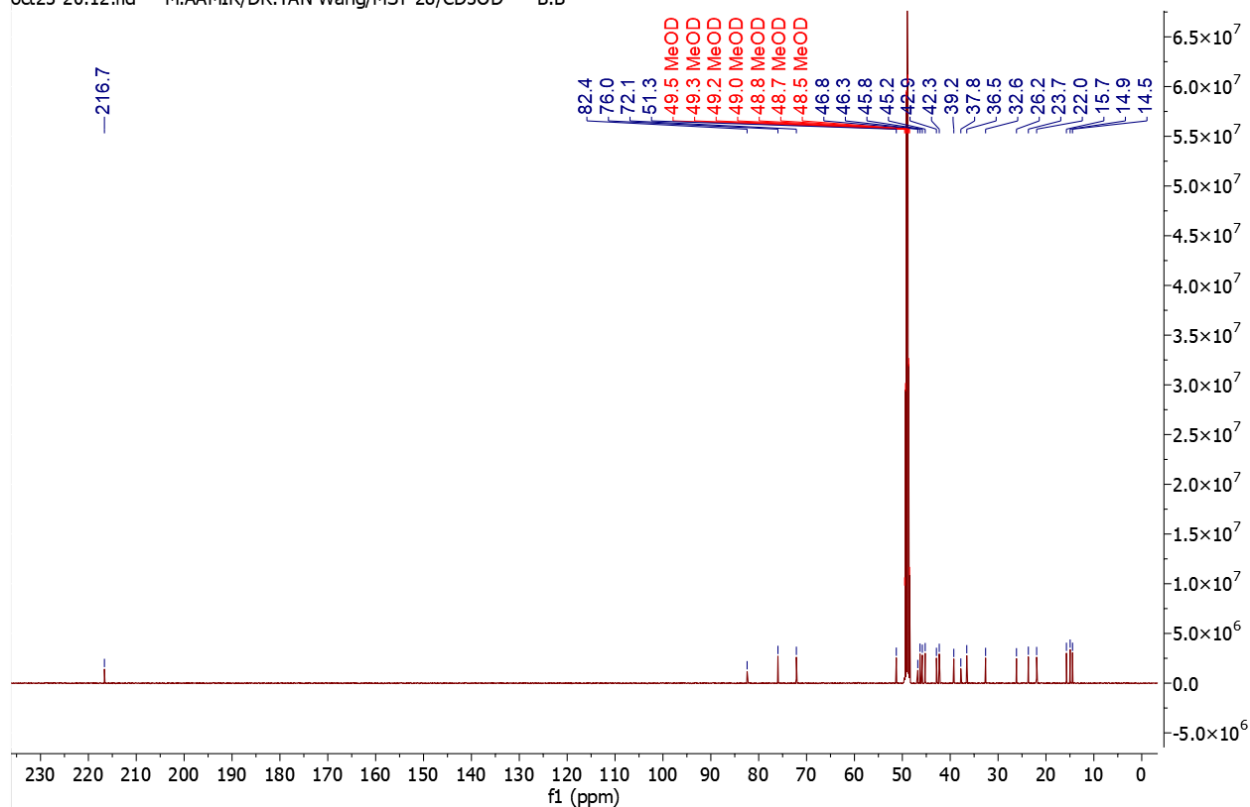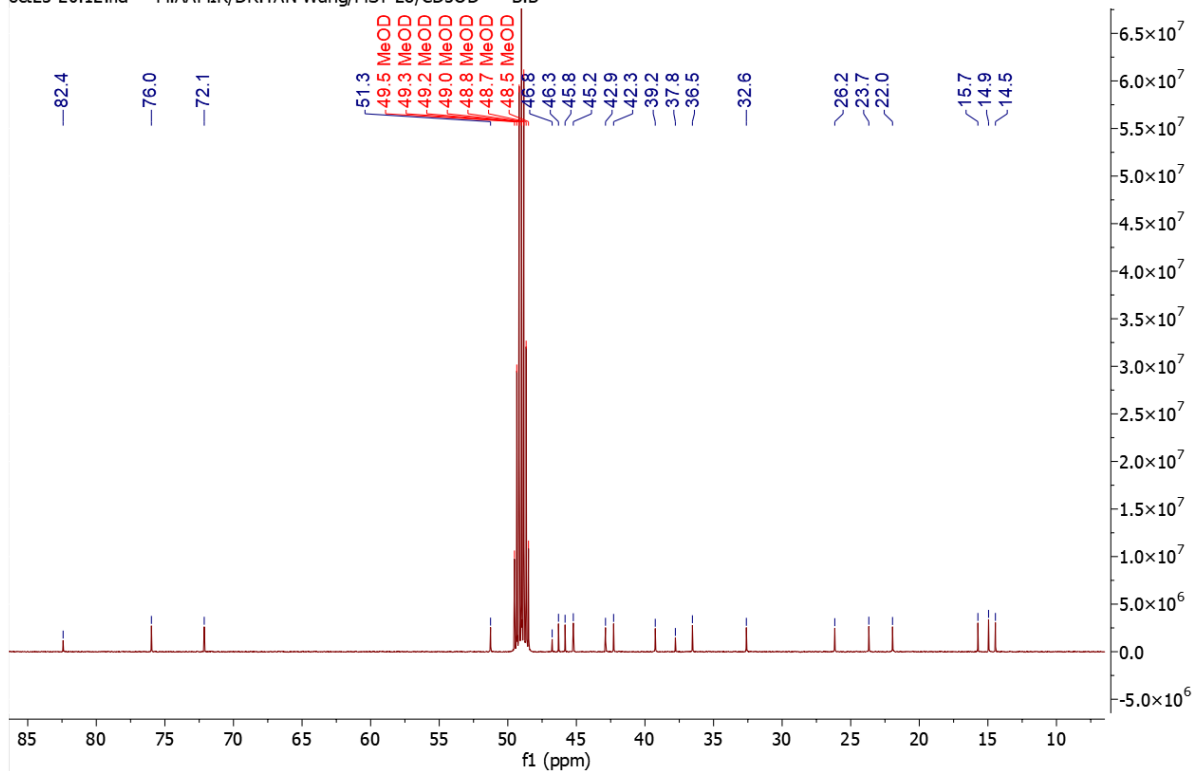

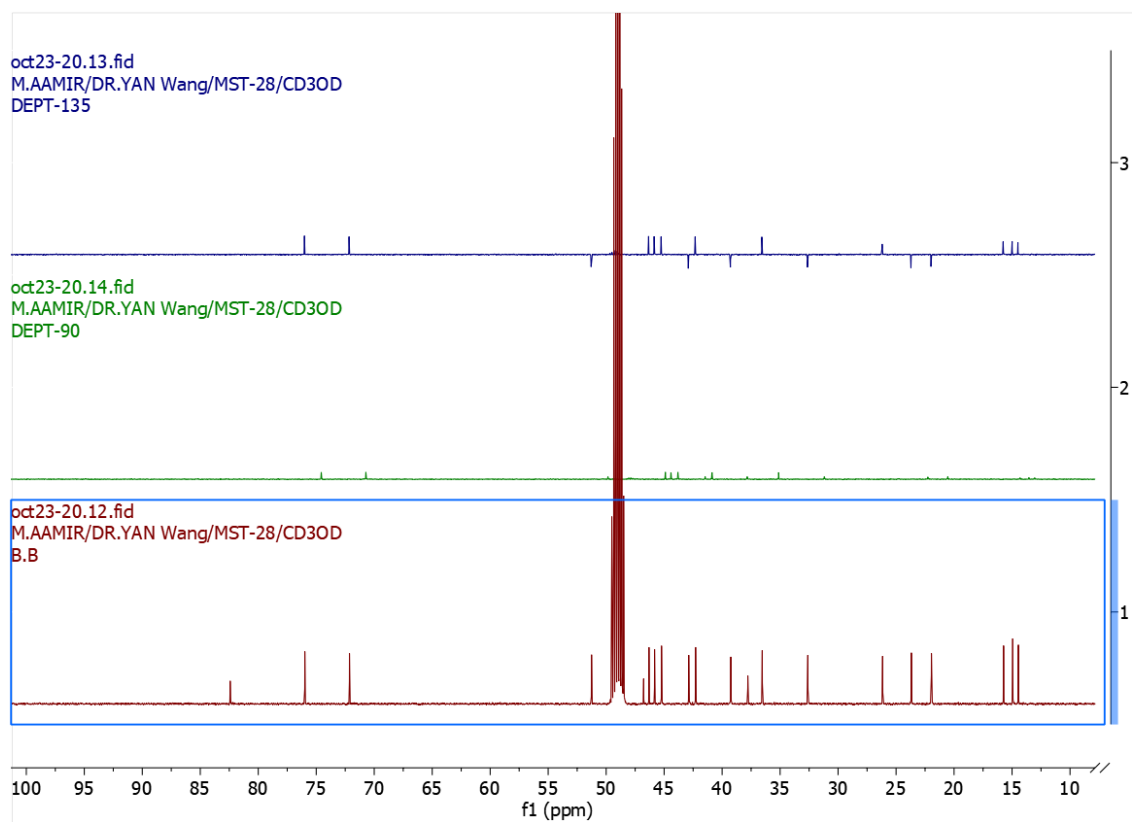

Figure S26. DEPT spectrum of compound **3**

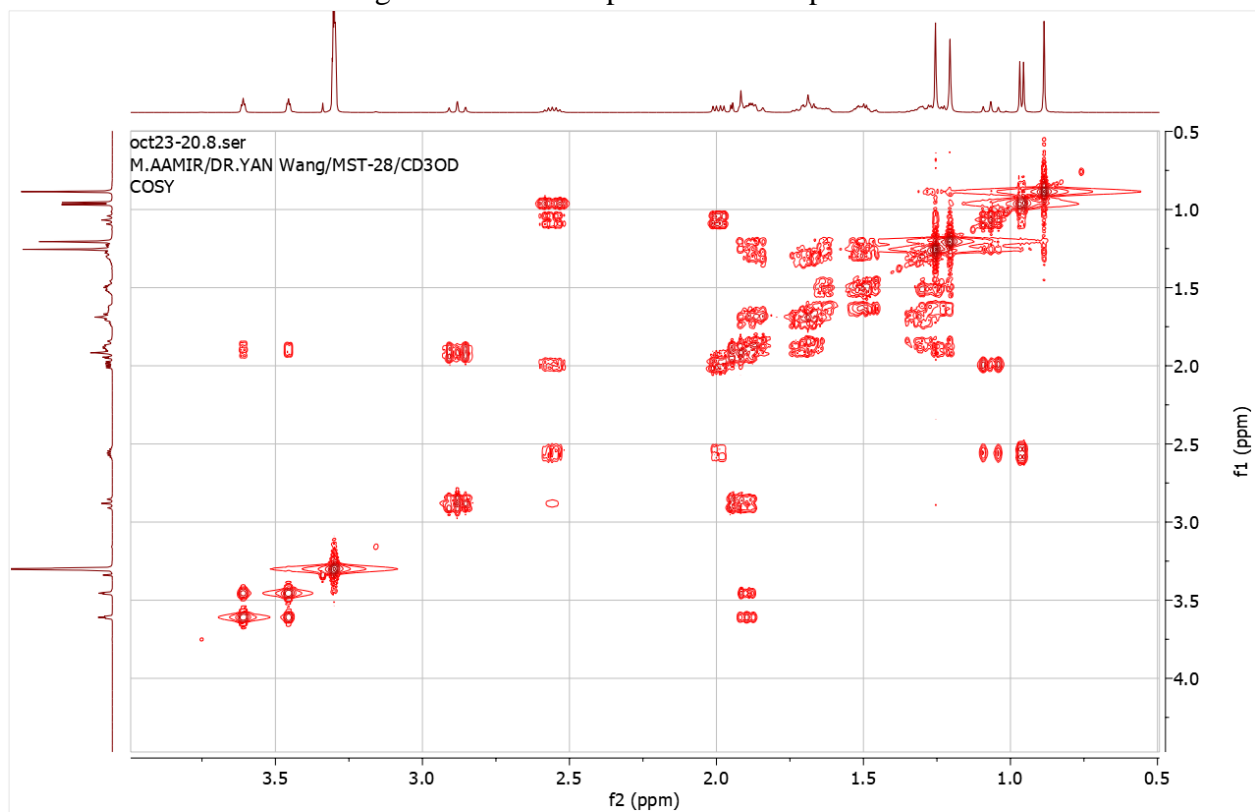

Figure S27.  $^1\text{H}$ - $^1\text{H}$  COSY spectrum of compound **3**

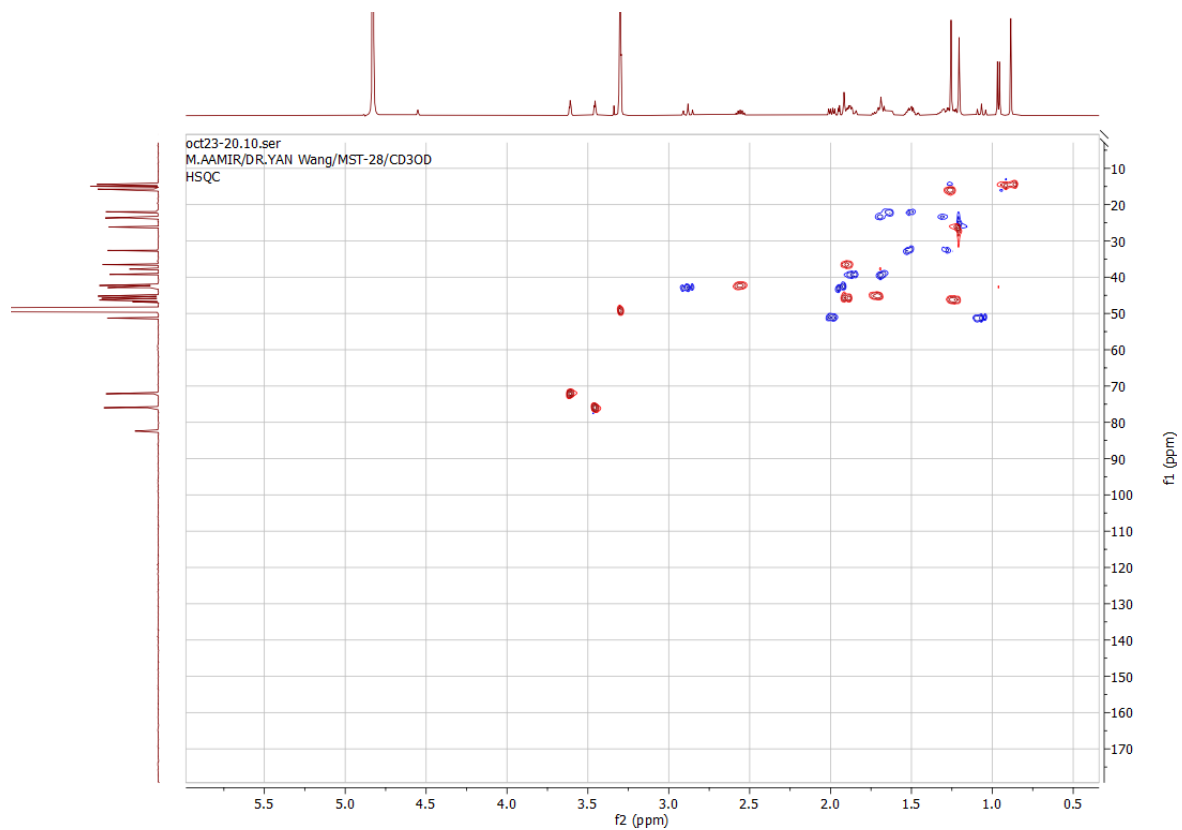

Figure S28. HSQC spectrum-1 of compound 3

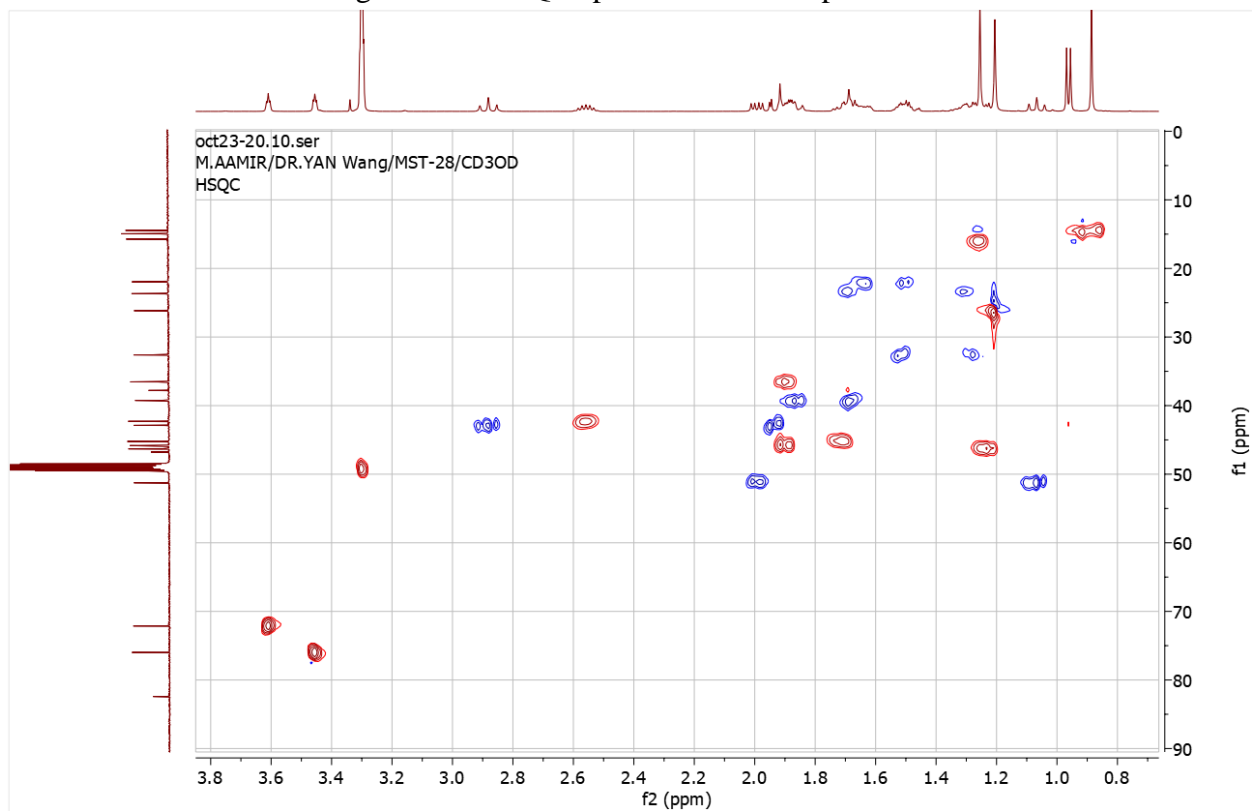

Figure S29. HSQC spectrum-2 of compound 3

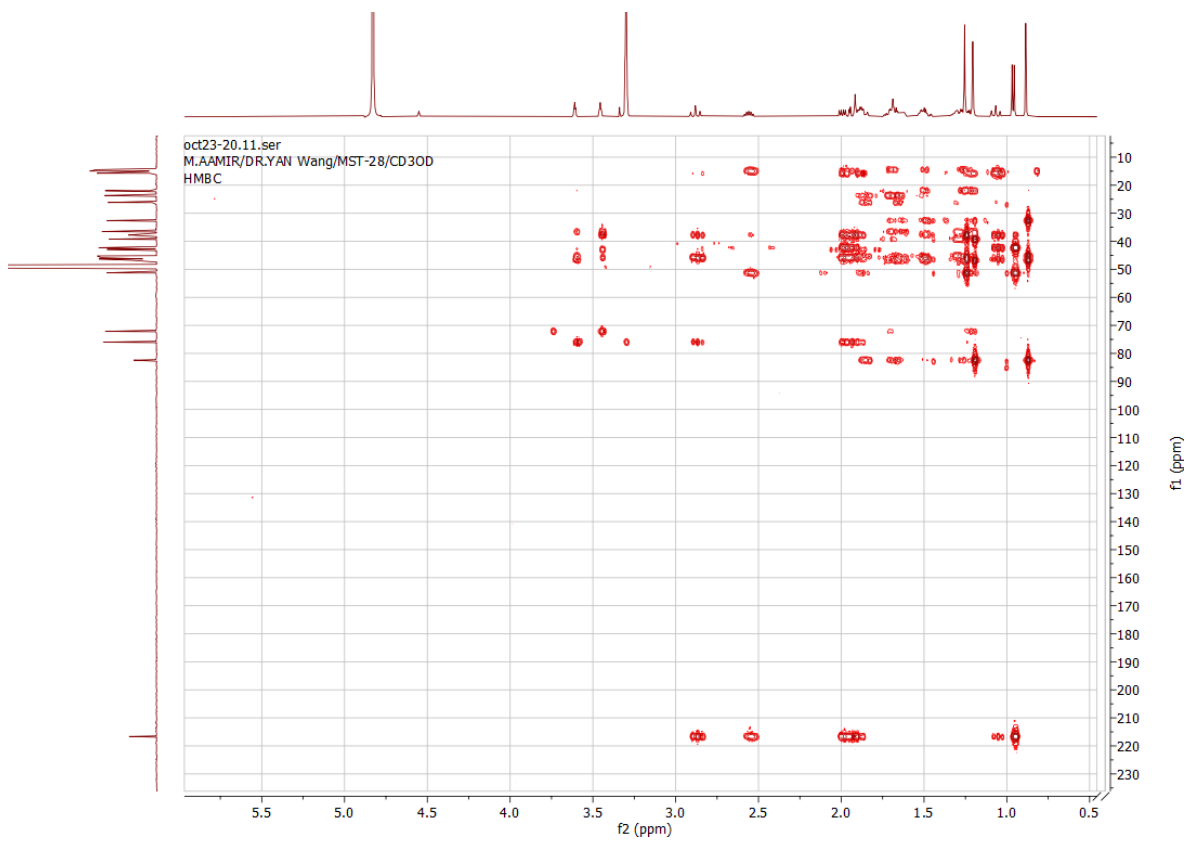

Figure S30. HMBC spectrum-1 of compound **3**

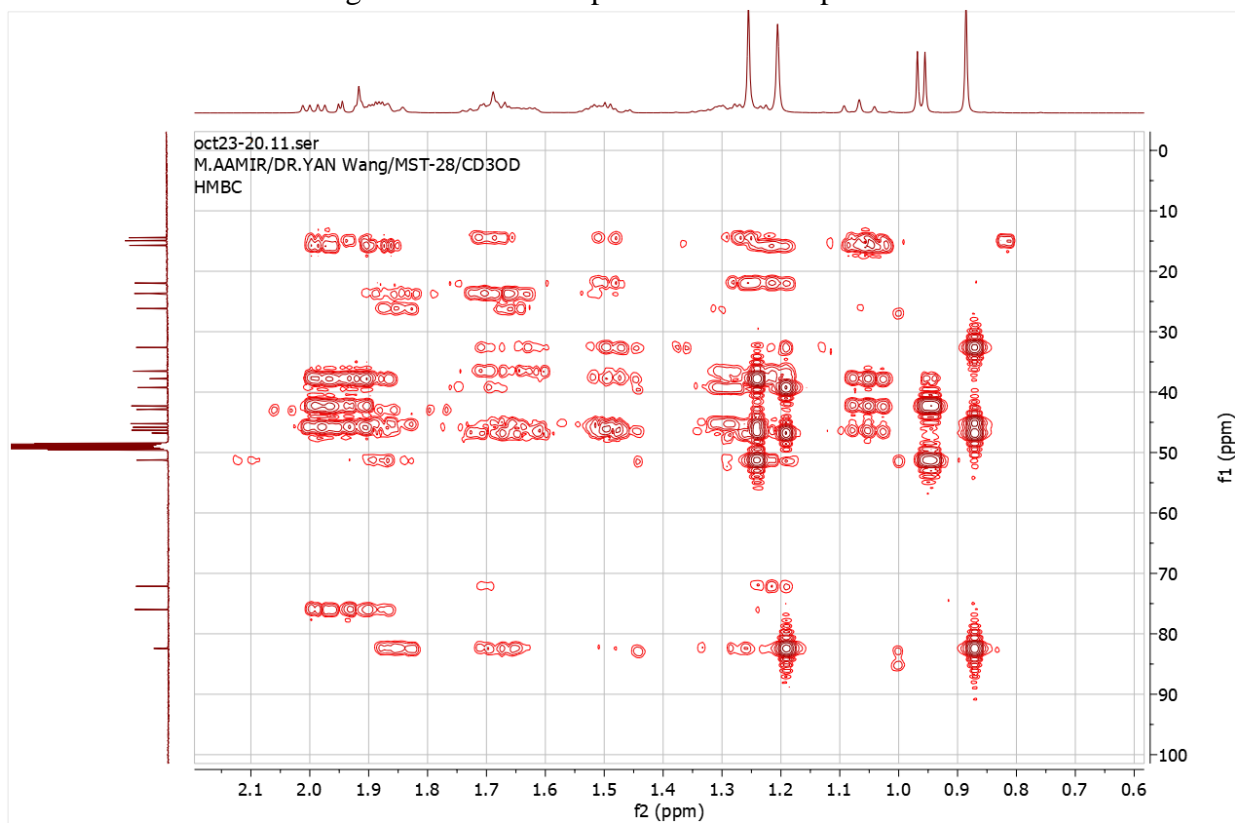

Figure S31. HMBC spectrum-2 of compound **3**

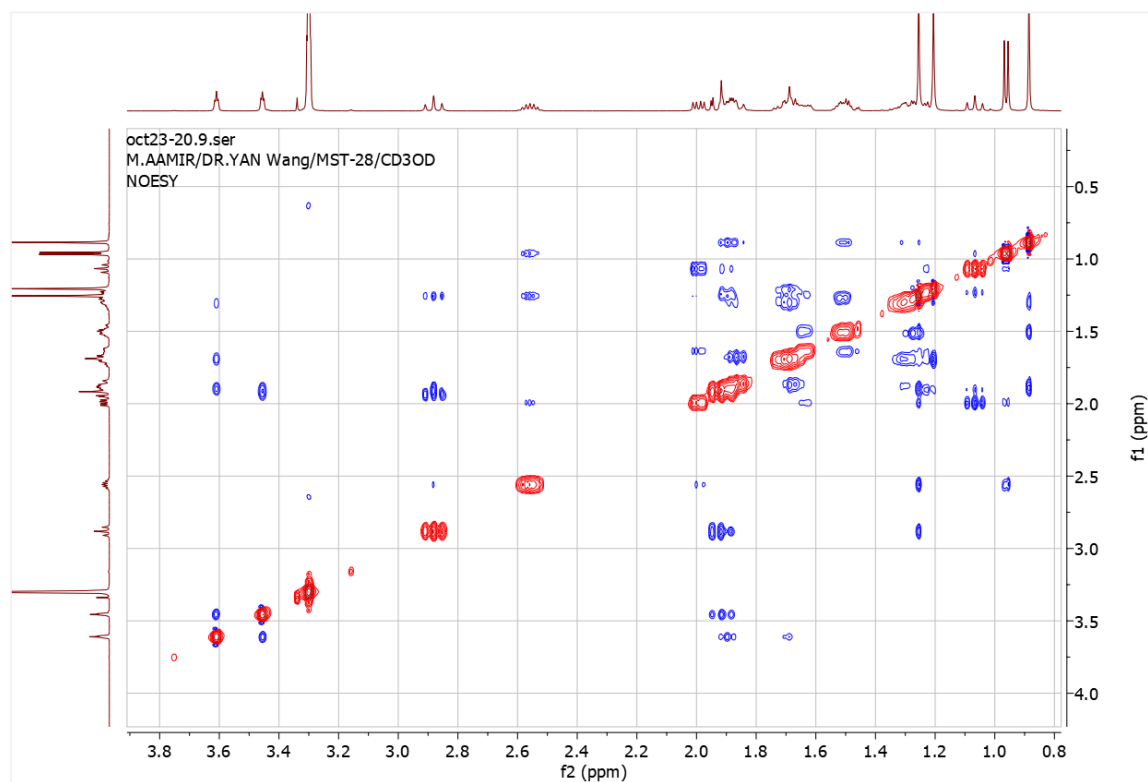

Figure S32. NOESY spectrum of compound **3**

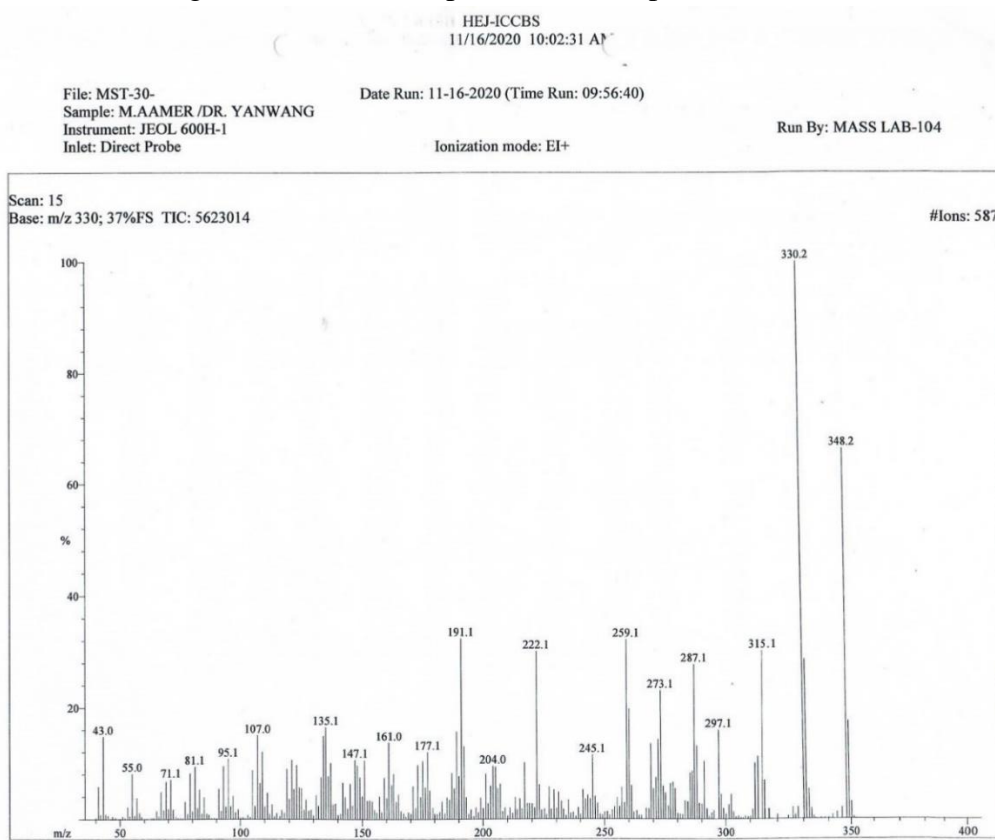

Figure S33. EI-MS spectrum of compound **4**

| Mass     | Relative Intensity | Theoretical Mass | Delta [ppm] | Delta [mmu] | RDB  | Composition                                    |
|----------|--------------------|------------------|-------------|-------------|------|------------------------------------------------|
| 287.2024 | 9.0                | 287.2011         | 4.4         | 1.3         | 6.5  | C <sub>19</sub> H <sub>27</sub> O <sub>2</sub> |
| 288.1905 | 4.5                | 288.1878         | 9.5         | 2.7         | 11.0 | C <sub>22</sub> H <sub>24</sub>                |
|          |                    | 288.1937         | -10.9       | -3.1        | 2.0  | C <sub>15</sub> H <sub>28</sub> O <sub>5</sub> |
| 289.1816 | 1.2                | 289.1804         | 4.3         | 1.2         | 6.5  | C <sub>18</sub> H <sub>25</sub> O <sub>3</sub> |
| 290.1845 | 1.0                | 290.1882         | -12.7       | -3.7        | 6.0  | C <sub>18</sub> H <sub>26</sub> O <sub>3</sub> |
| 291.1963 | 3.3                | 291.1960         | 1.1         | 0.3         | 5.5  | C <sub>18</sub> H <sub>27</sub> O <sub>3</sub> |
| 295.1946 | 1.1                | 295.1909         | 12.3        | 3.6         | 4.5  | C <sub>17</sub> H <sub>27</sub> O <sub>4</sub> |
| 297.1851 | 10.7               | 297.1855         | -1.4        | -0.4        | 8.5  | C <sub>20</sub> H <sub>25</sub> O <sub>2</sub> |
| 298.1926 | 2.6                | 298.1933         | -2.2        | -0.7        | 8.0  | C <sub>20</sub> H <sub>26</sub> O <sub>2</sub> |
| 299.2004 | 2.2                | 299.2011         | -2.3        | -0.7        | 7.5  | C <sub>20</sub> H <sub>27</sub> O <sub>2</sub> |
| 302.2079 | 1.3                | 302.2093         | -4.7        | -1.4        | 2.0  | C <sub>16</sub> H <sub>30</sub> O <sub>5</sub> |
|          |                    | 302.2035         | 14.7        | 4.5         | 11.0 | C <sub>23</sub> H <sub>26</sub>                |
| 312.2023 | 5.9                | 312.2089         | -21.2       | -6.6        | 8.0  | C <sub>21</sub> H <sub>20</sub> O <sub>2</sub> |
|          |                    | 312.1937         | 27.6        | 8.6         | 4.0  | C <sub>17</sub> H <sub>28</sub> O <sub>5</sub> |
| 313.2092 | 4.0                | 313.2168         | -24.1       | -7.5        | 7.5  | C <sub>21</sub> H <sub>29</sub> O <sub>2</sub> |
|          |                    | 313.2015         | 24.6        | 7.7         | 3.5  | C <sub>17</sub> H <sub>29</sub> O <sub>5</sub> |
| 314.2201 | 1.7                | 314.2246         | -14.3       | -4.5        | 7.0  | C <sub>21</sub> H <sub>30</sub> O <sub>2</sub> |
|          |                    | 314.2093         | 34.3        | 10.8        | 3.0  | C <sub>17</sub> H <sub>30</sub> O <sub>5</sub> |
| 315.1947 | 18.0               | 315.1960         | -4.2        | -1.3        | 7.5  | C <sub>20</sub> H <sub>27</sub> O <sub>3</sub> |
| 316.2022 | 3.9                | 316.2038         | -5.3        | -1.7        | 7.0  | C <sub>20</sub> H <sub>28</sub> O <sub>3</sub> |
| 328.2081 | 1.0                | 328.2038         | 12.9        | 4.2         | 8.0  | C <sub>21</sub> H <sub>28</sub> O <sub>3</sub> |
|          |                    | 328.2191         | -33.6       | -11.0       | 12.0 | C <sub>25</sub> H <sub>28</sub>                |
| 330.2218 | 25.4               | 330.2195         | 7.1         | 2.3         | 7.0  | C <sub>21</sub> H <sub>30</sub> O <sub>3</sub> |
| 331.2249 | 6.9                | 331.2273         | -7.4        | -2.5        | 6.5  | C <sub>21</sub> H <sub>31</sub> O <sub>3</sub> |
| 332.2369 | 2.4                | 332.2351         | 5.4         | 1.8         | 6.0  | C <sub>21</sub> H <sub>32</sub> O <sub>3</sub> |
| 348.2305 | 11.4               | 348.2301         | 1.3         | 0.5         | 6.0  | C <sub>21</sub> H <sub>32</sub> O <sub>4</sub> |
| 349.2318 | 2.6                | 349.2379         | -17.4       | -6.1        | 5.5  | C <sub>21</sub> H <sub>33</sub> O <sub>4</sub> |
|          |                    | 349.2226         | 26.3        | 9.2         | 1.5  | C <sub>17</sub> H <sub>33</sub> O <sub>7</sub> |

MST-30

Activate Window  
Go to Settings to acti

Figure S34. HREI-MS spectrum of compound 4

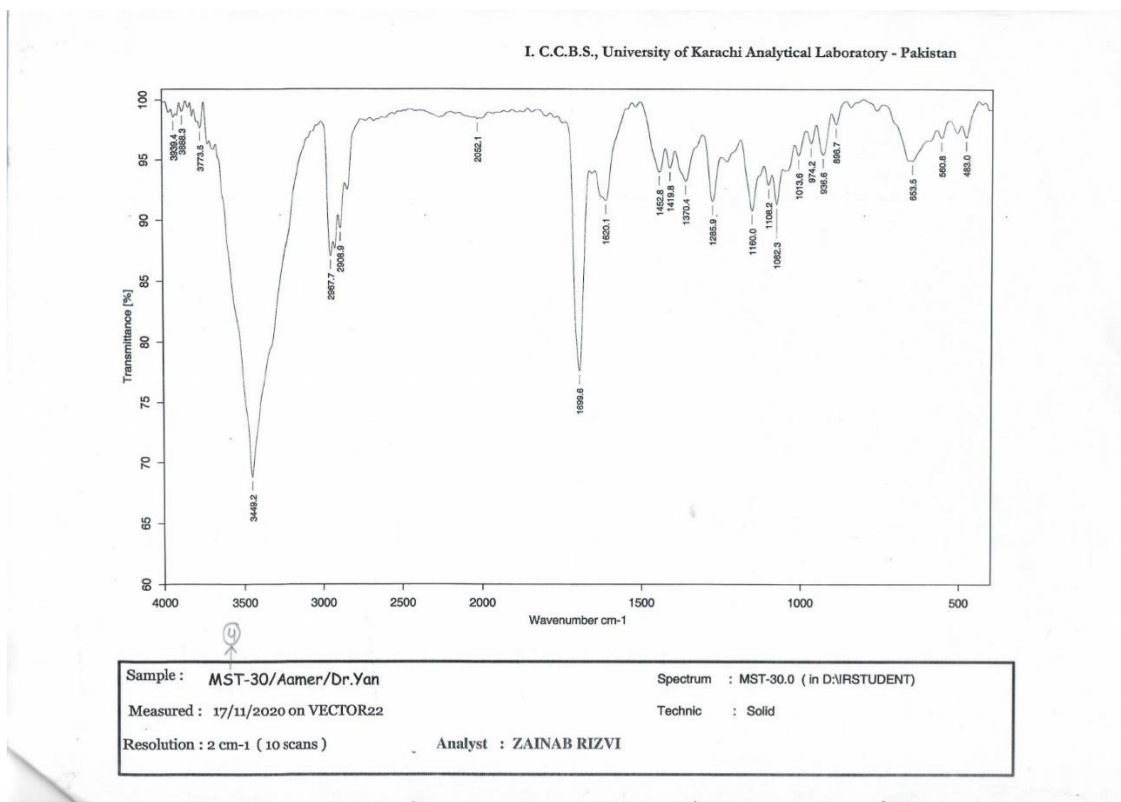

Figure S35. IR spectrum of compound 4

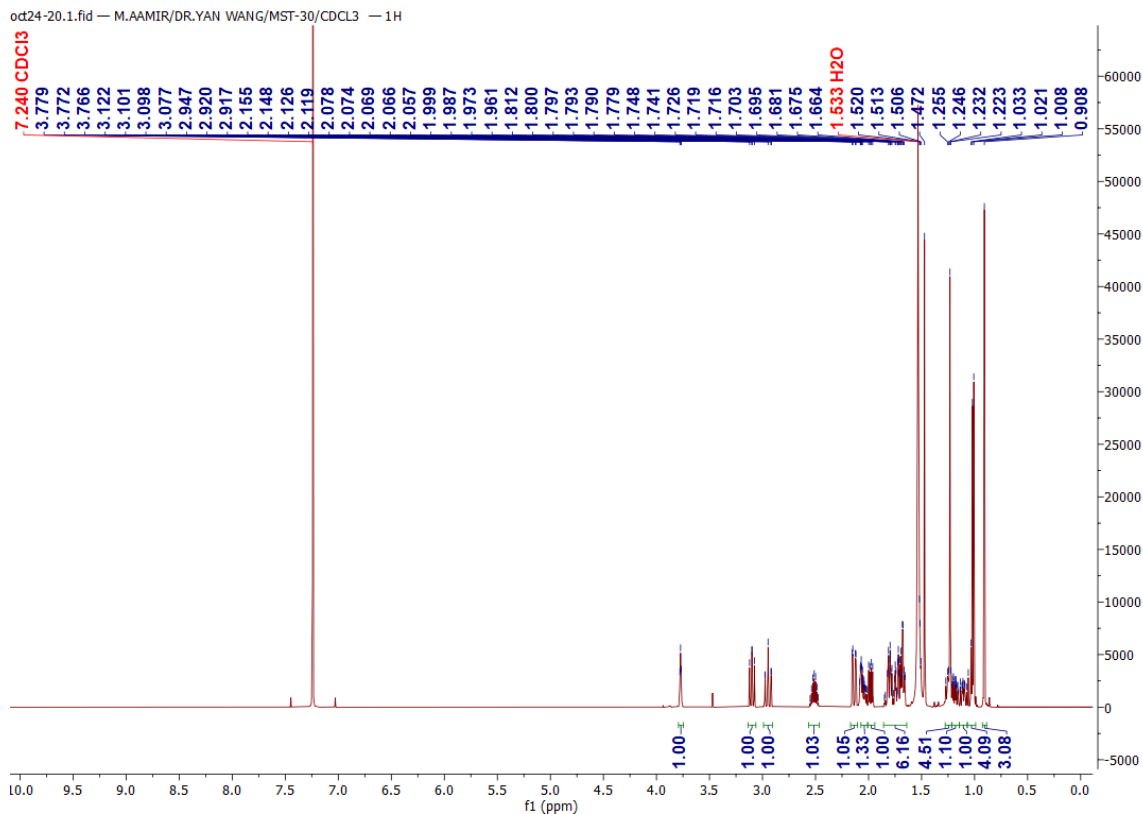

Figure S36. <sup>1</sup>H NMR spectrum-1 of compound **4** (500 MHz, CD<sub>3</sub>OD)

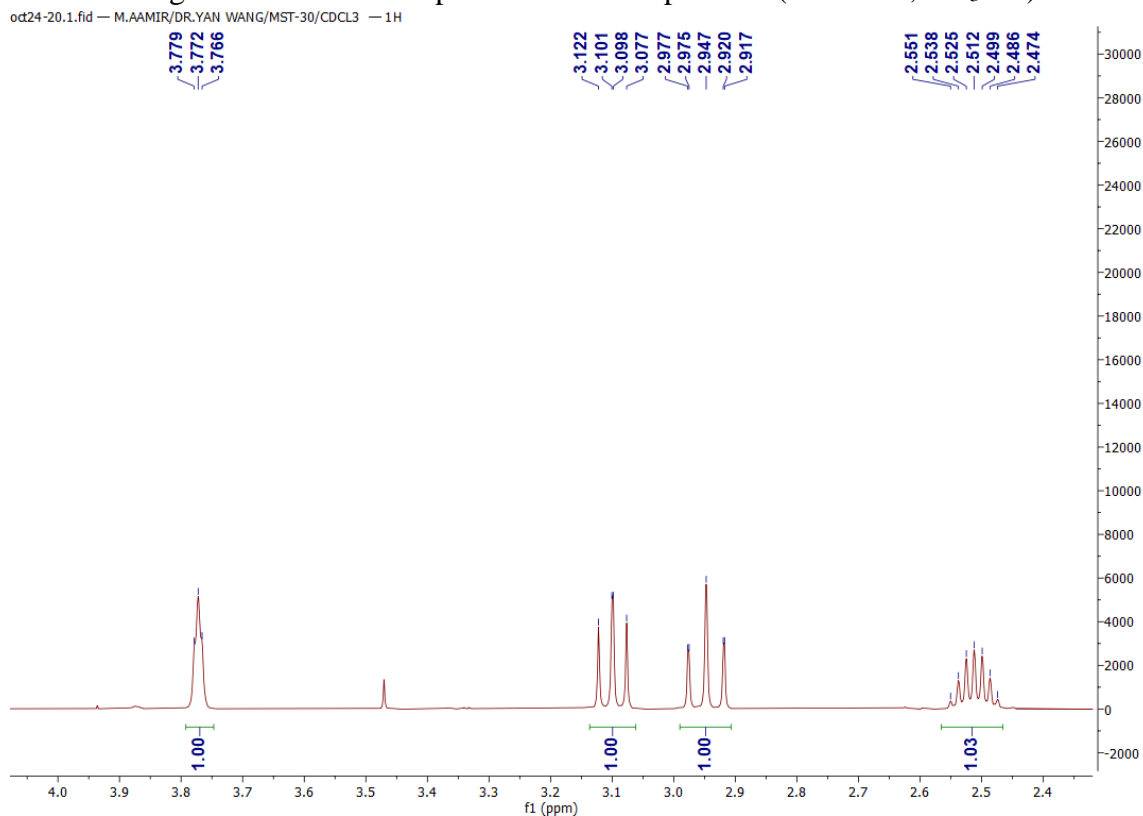

Figure S37. <sup>1</sup>H NMR spectrum-2 of compound **4** (500 MHz, CD<sub>3</sub>OD)

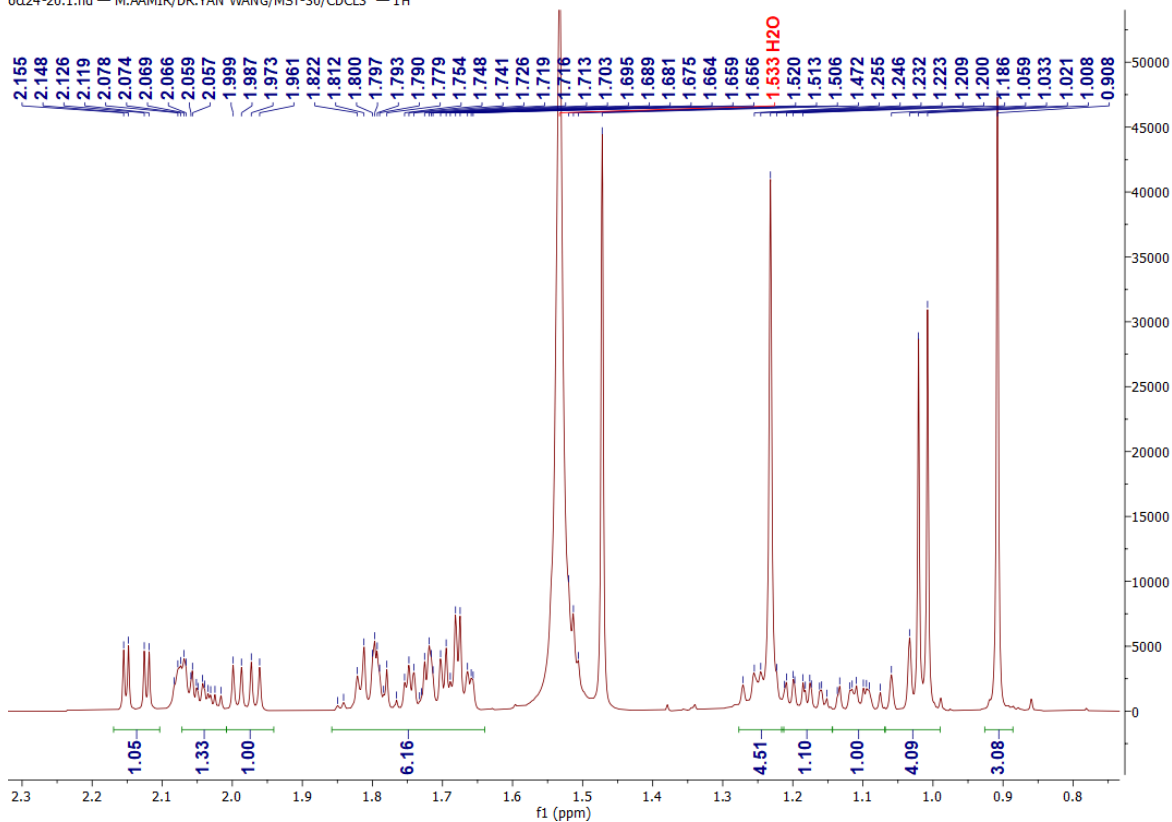

Figure S38.  $^1\text{H}$  NMR spectrum-3 of compound **4** (500 MHz,  $\text{CD}_3\text{OD}$ )

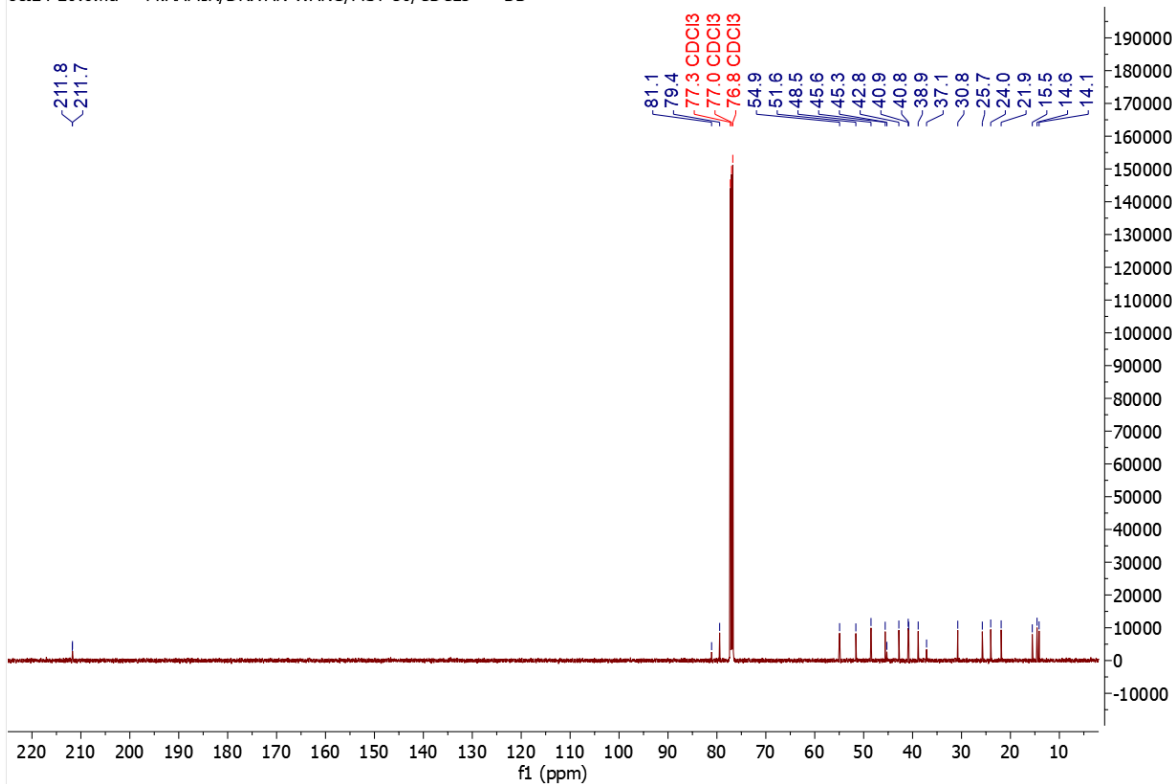

Figure S39.  $^{13}\text{C}$  NMR spectrum-1 of compound **4** (125 MHz,  $\text{CD}_3\text{OD}$ )



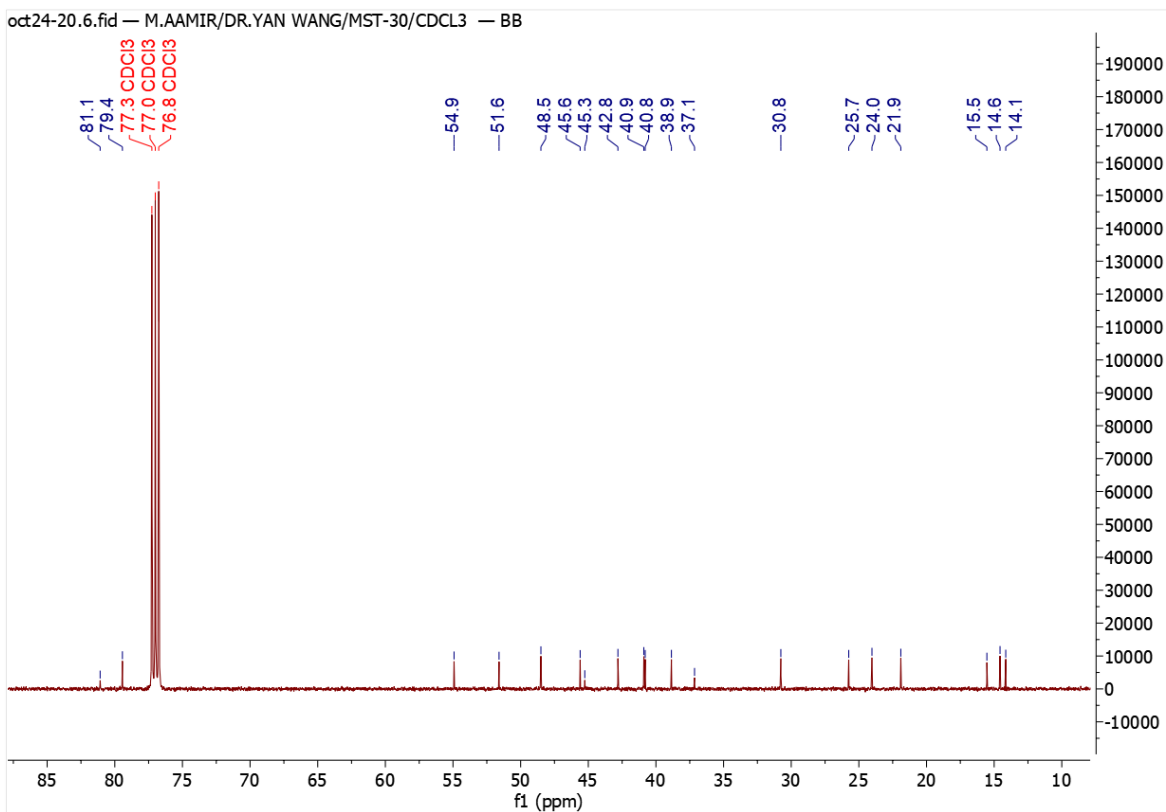

Figure S40. <sup>13</sup>C NMR spectrum-2 of compound **4** (125 MHz, CD<sub>3</sub>OD)

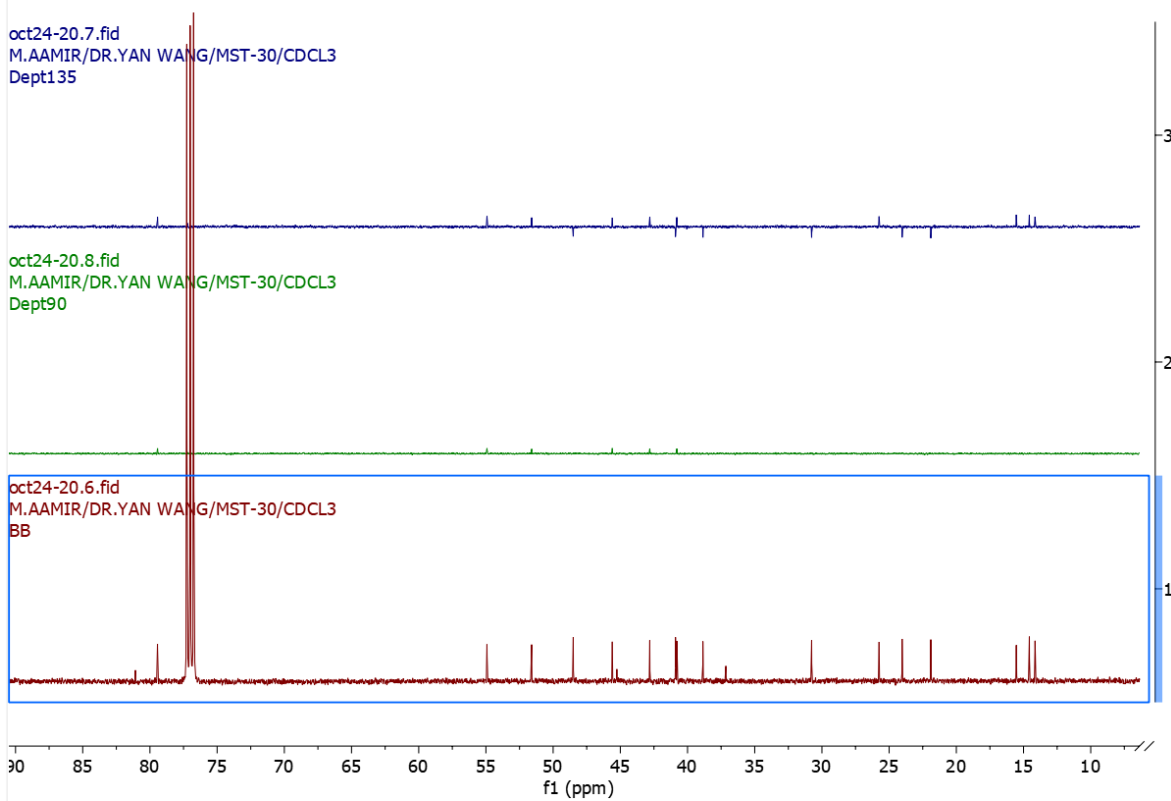

Figure S41. DEPT spectrum of compound **4**

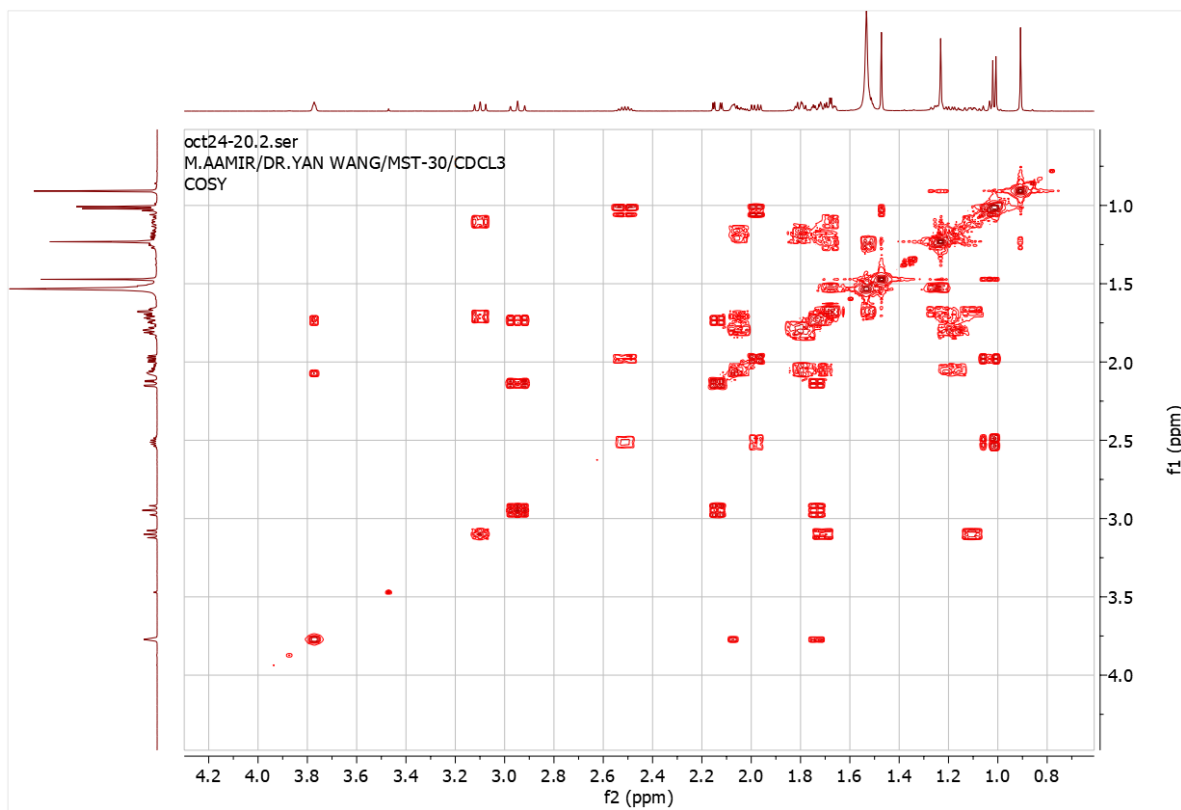

Figure S42.  $^1\text{H}$ - $^1\text{H}$  COSY spectrum of compound **4**

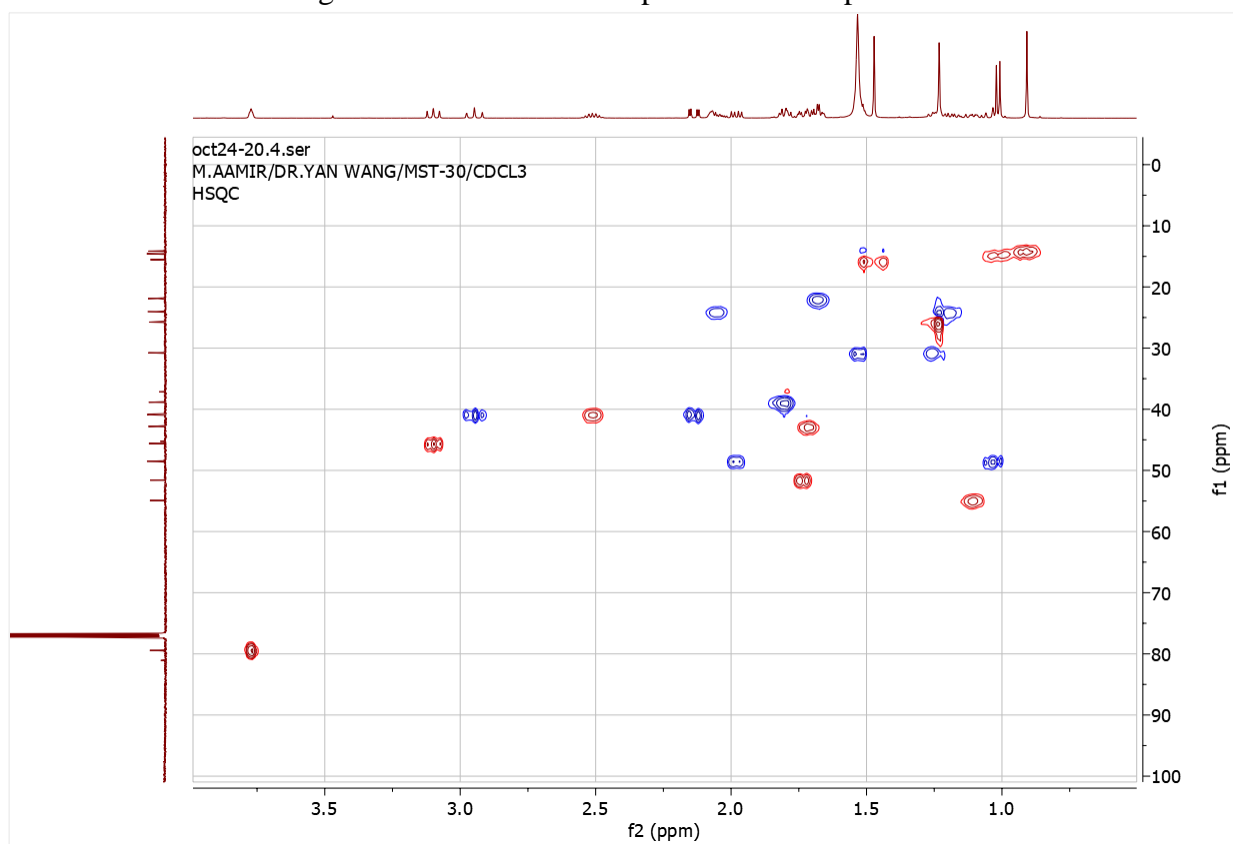

Figure S43. HSQC spectrum of compound **4**

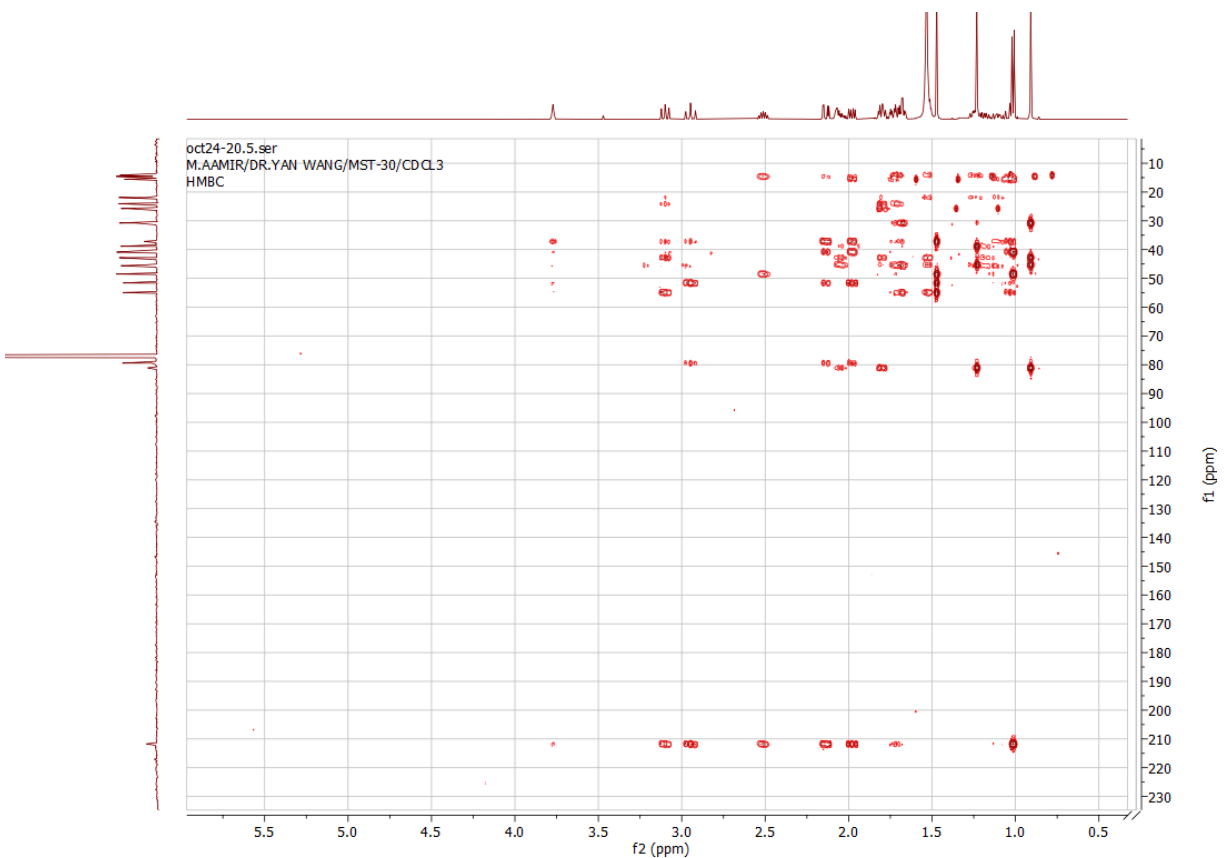

Figure S44. HMBC spectrum-1 of compound **4**

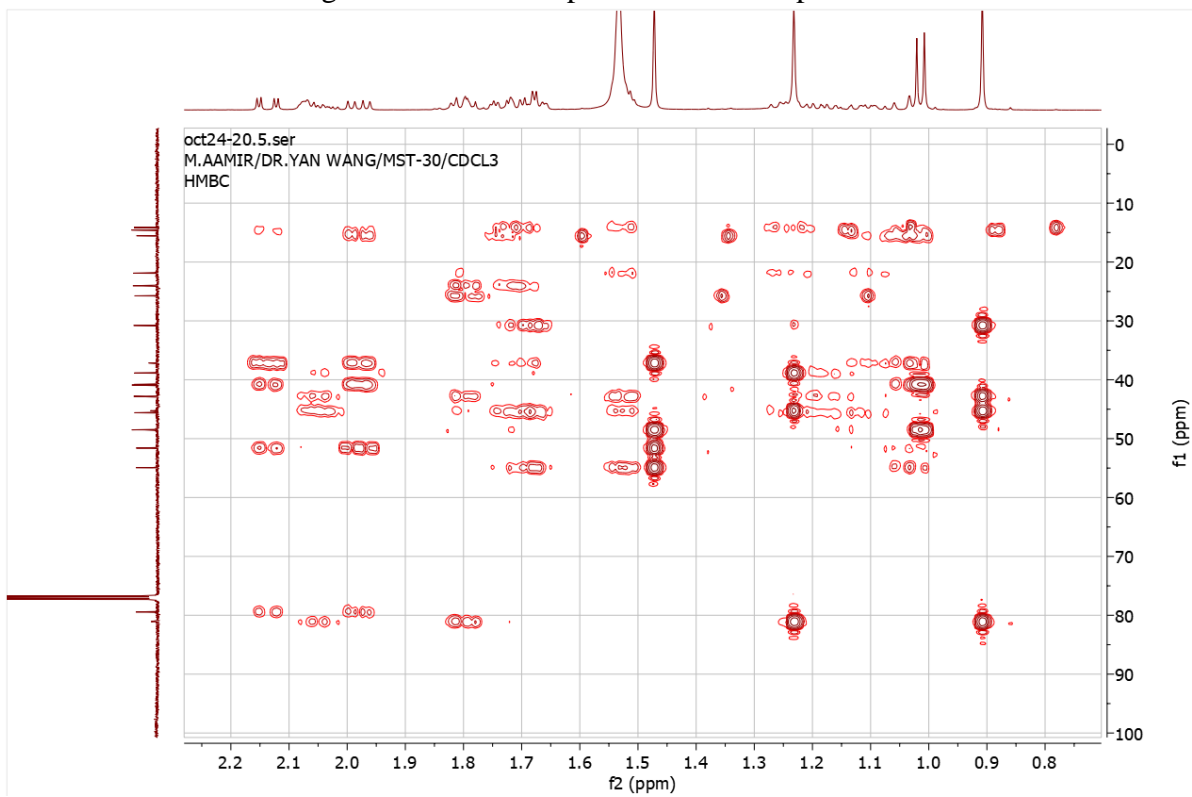

Figure S45. HMBC spectrum-2 of compound **4**

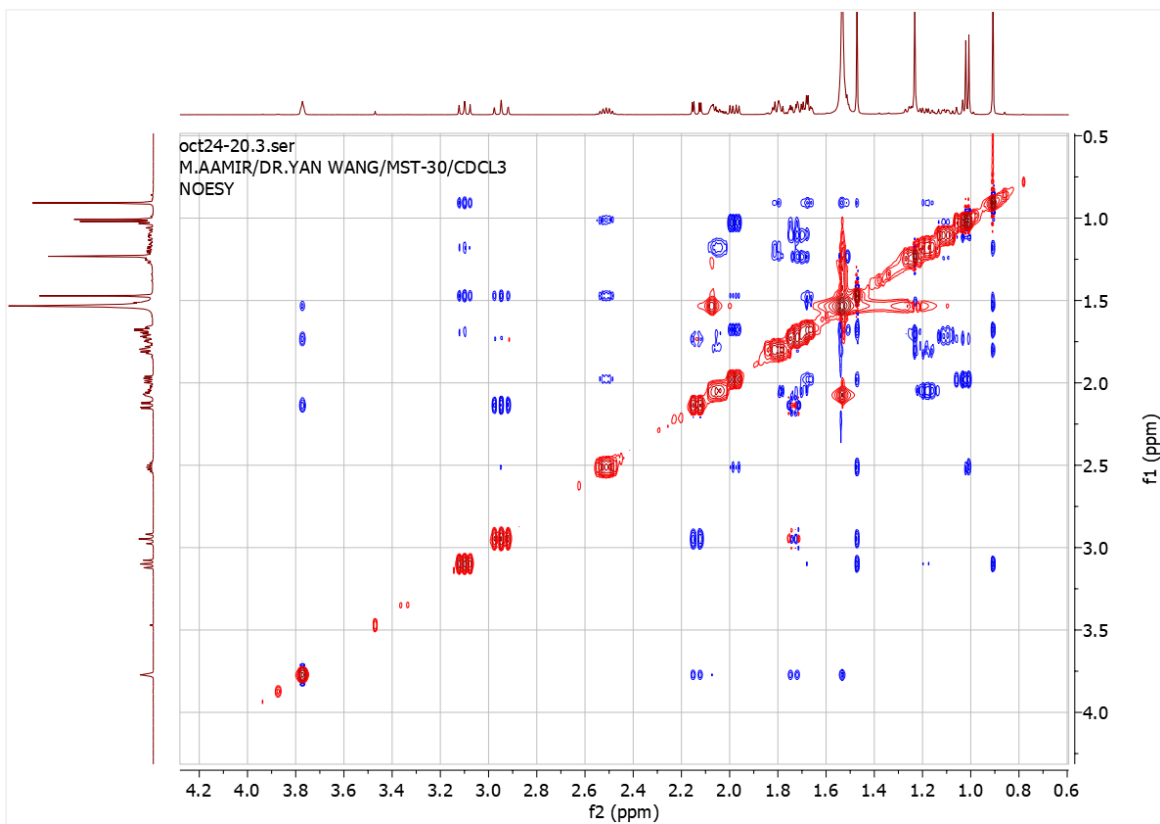

Figure S46. NOESY spectrum of compound 4

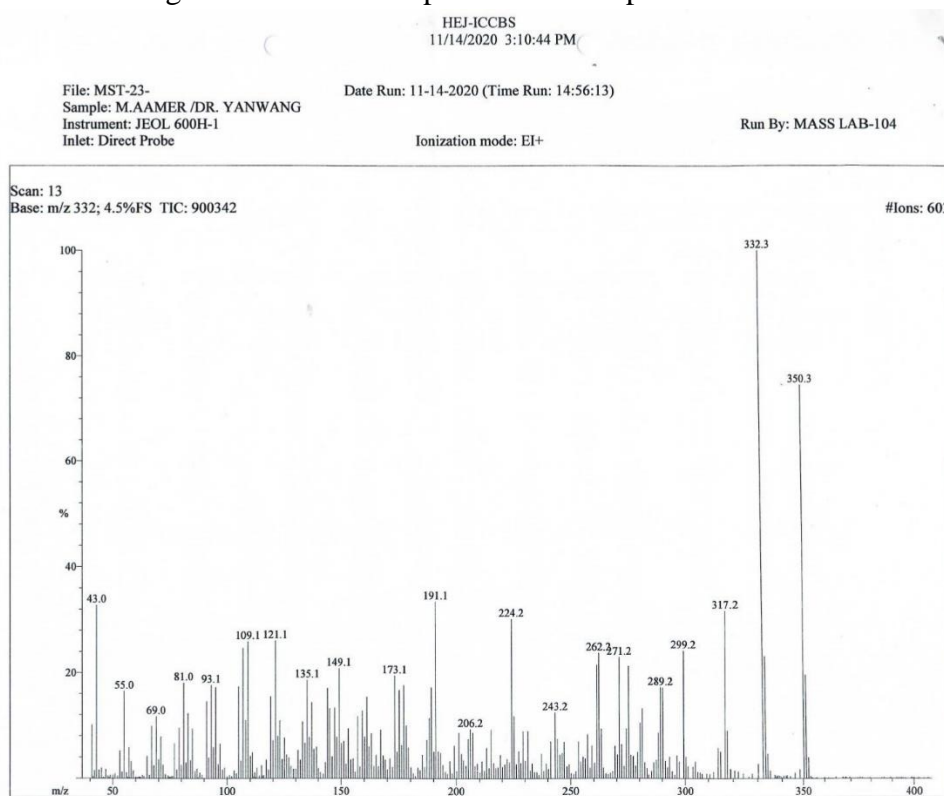

Figure S47. EI-MS spectrum of compound 5



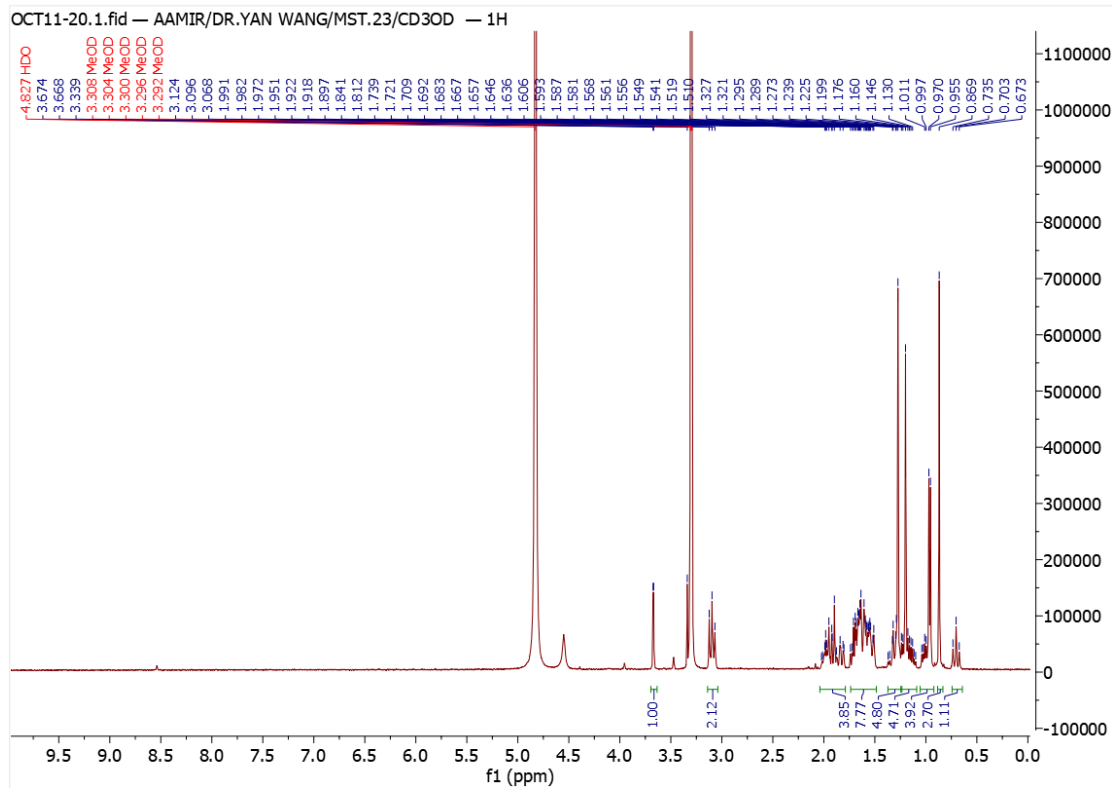

Figure S50.  $^1\text{H}$  NMR spectrum-1 of compound **5** (400 MHz,  $\text{CD}_3\text{OD}$ )

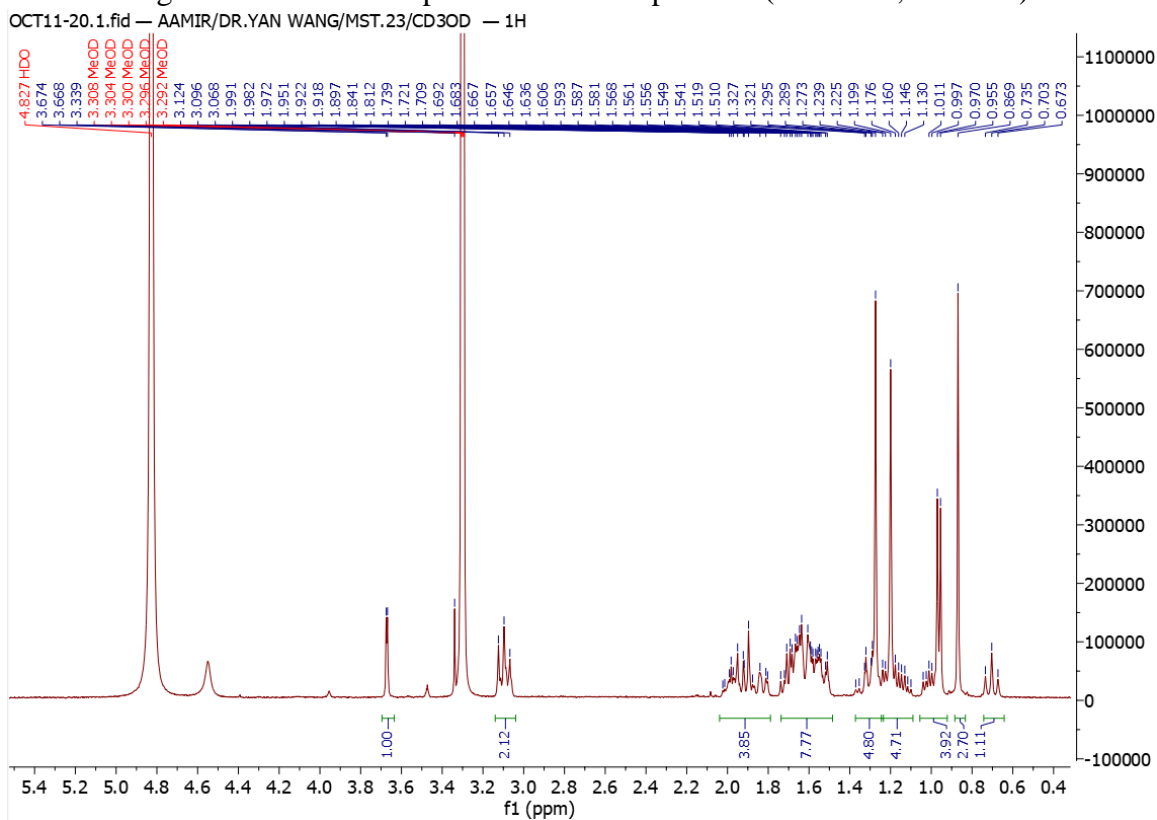

Figure S51.  $^1\text{H}$  NMR spectrum-2 of compound **5** (400 MHz,  $\text{CD}_3\text{OD}$ )

OCT11-20.6.fid — AAMIR/DR.YAN WANG/MST.23/CD3OD — BB

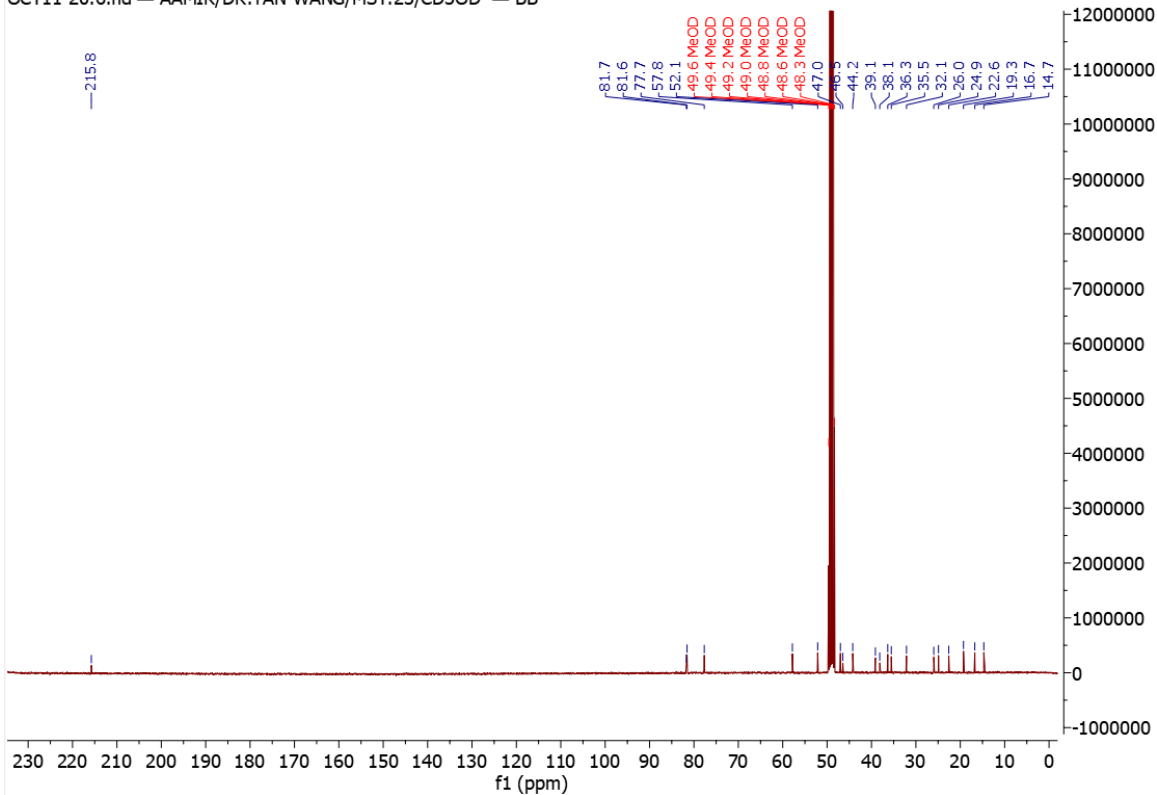

OCT11-20.6.fid — AAMIR/DR.YAN WANG/MST.23/CD3OD — BB

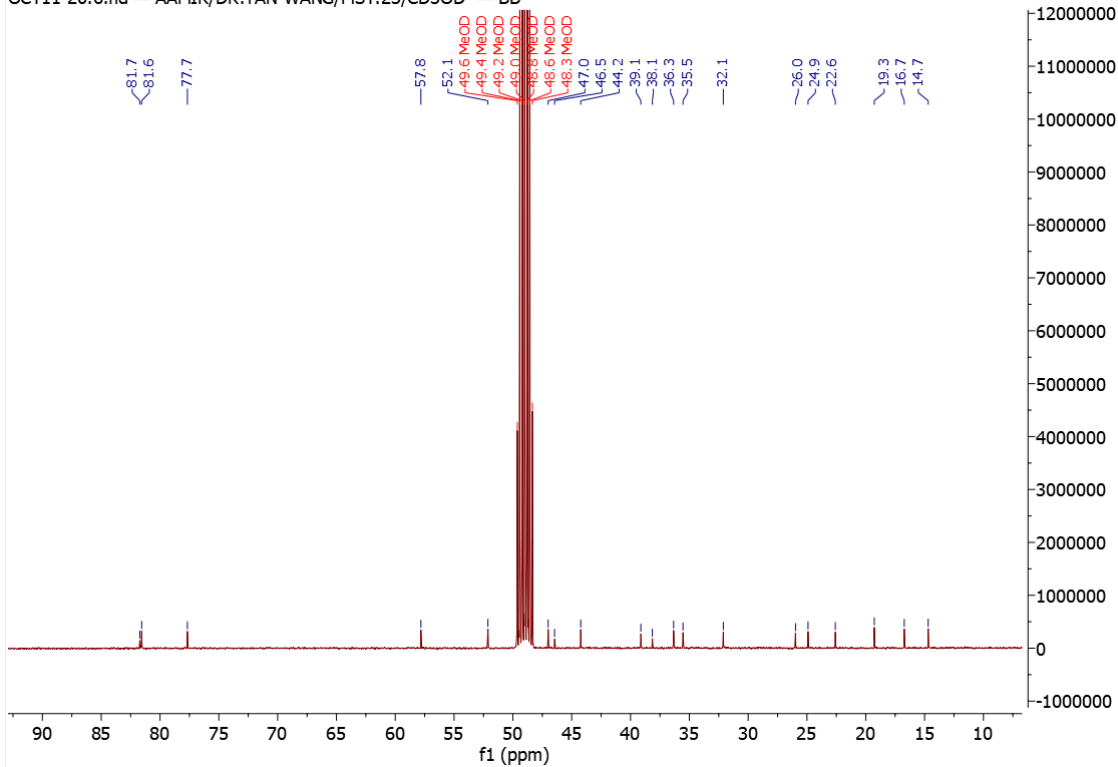

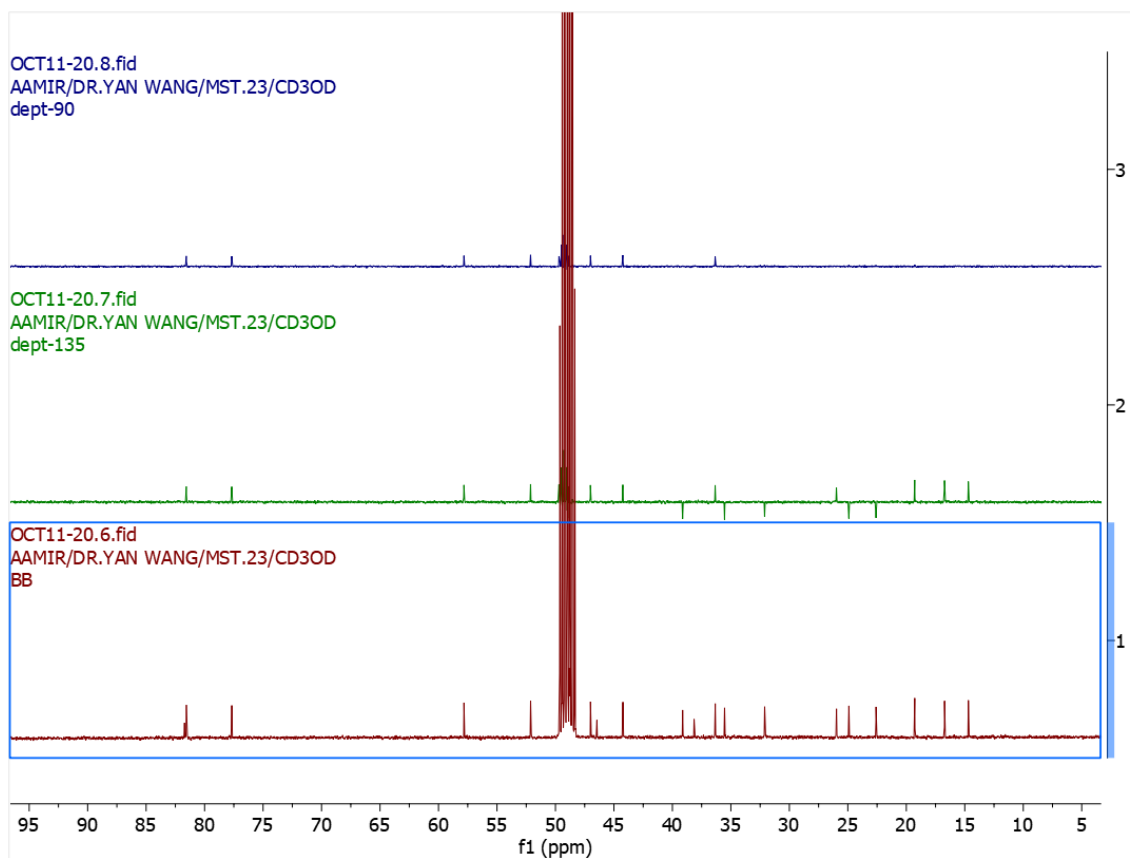

Figure S54. DEPT spectrum of compound **5**

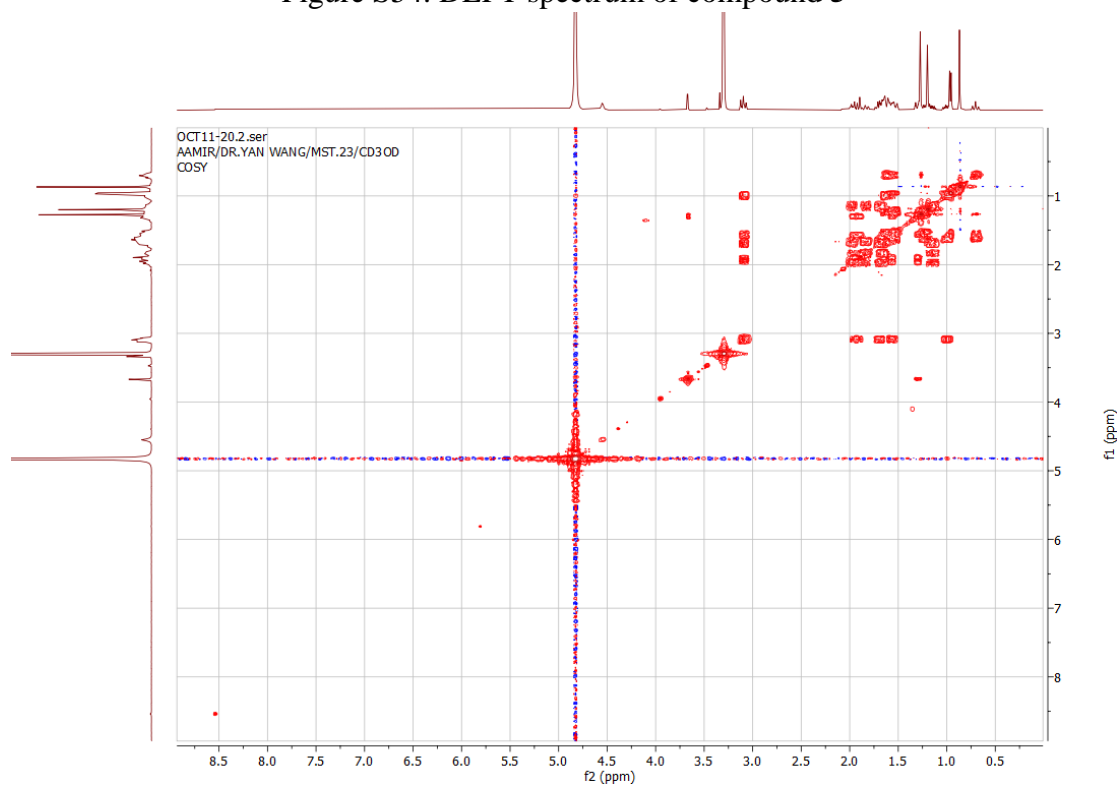

Figure S55.  $^1\text{H}$ - $^1\text{H}$  COSY spectrum-1 of compound **5**



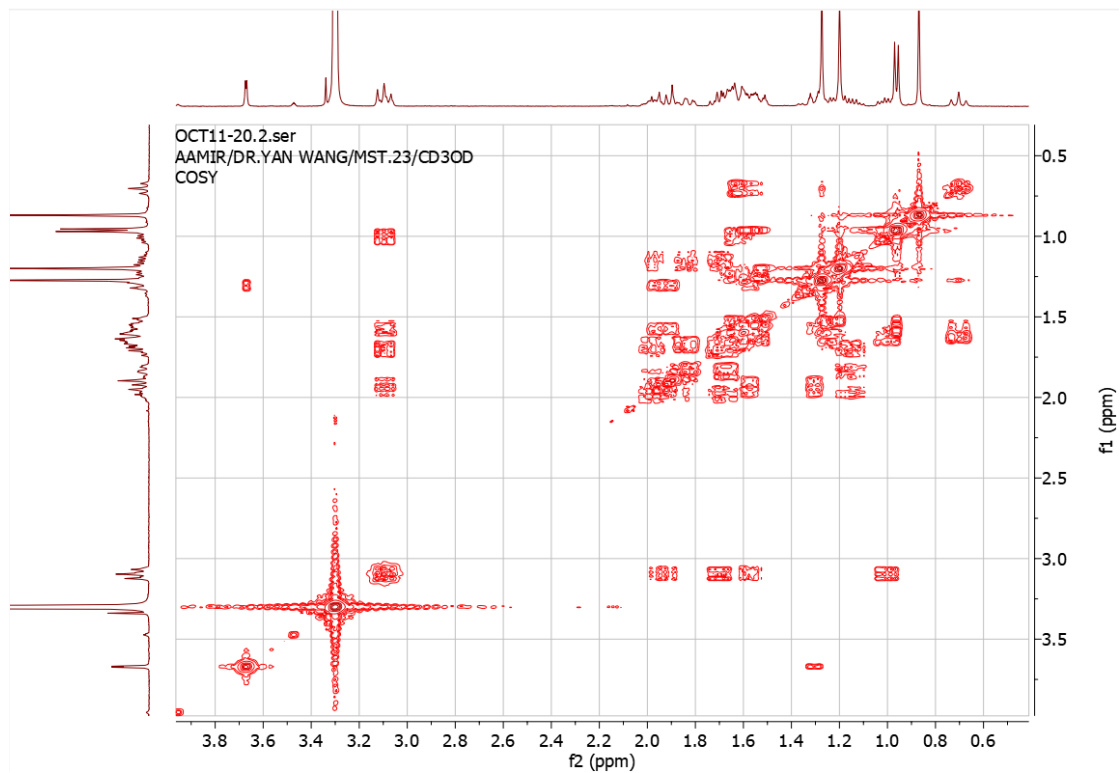

Figure S56.  $^1\text{H}$ - $^1\text{H}$  COSY spectrum-2 of compound **5**

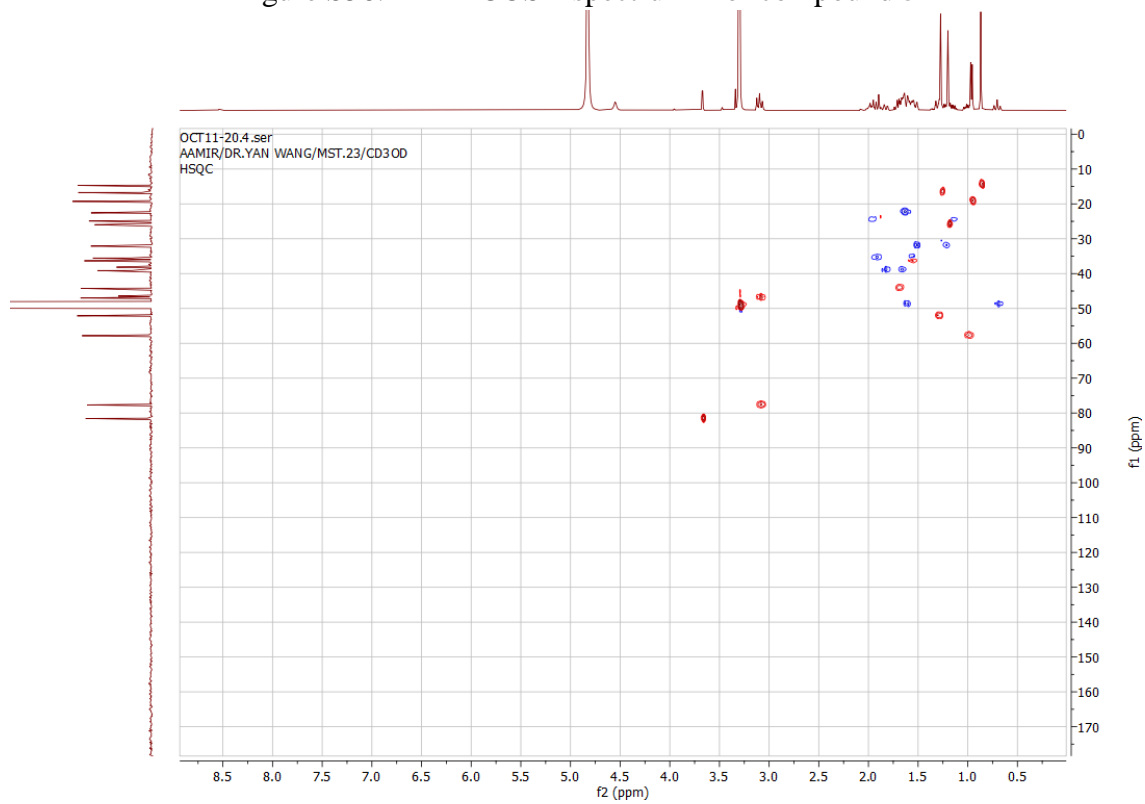

Figure S57. HSQC spectrum-1 of compound **5**

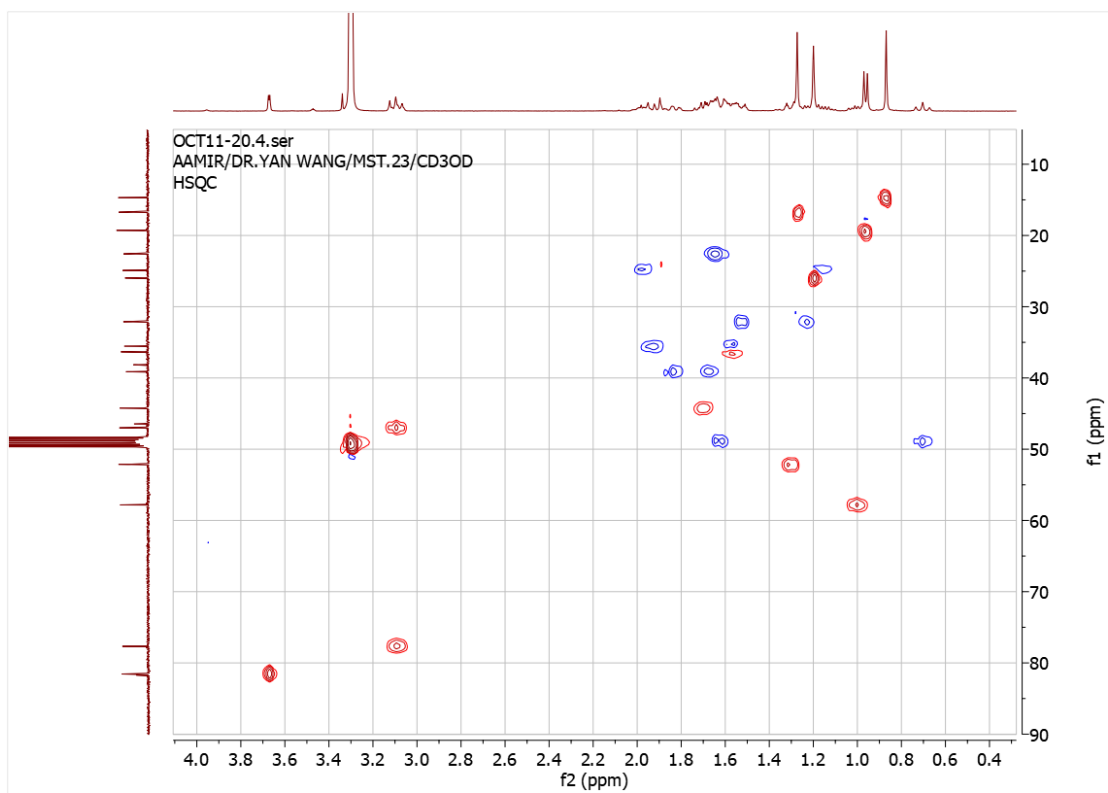

Figure S58. HSQC spectrum-2 of compound **5**

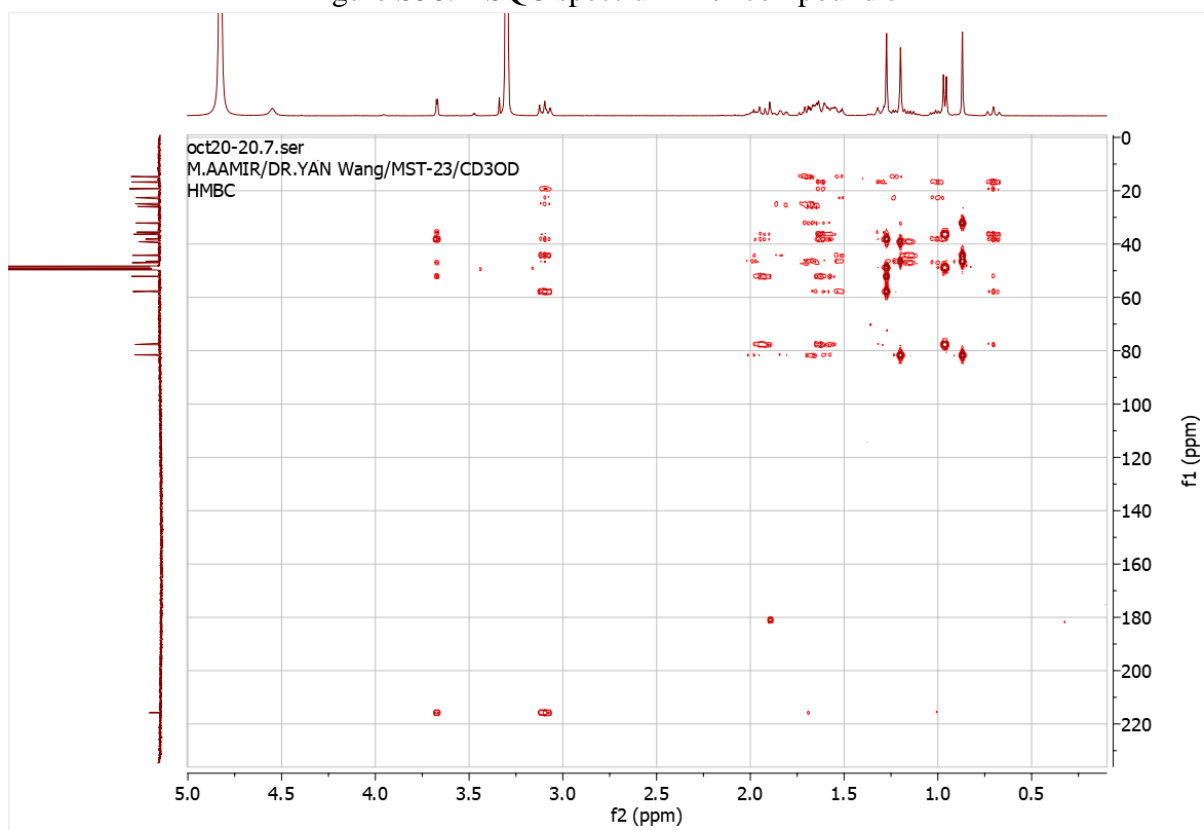

Figure S59. HMBC spectrum-1 of compound **5**

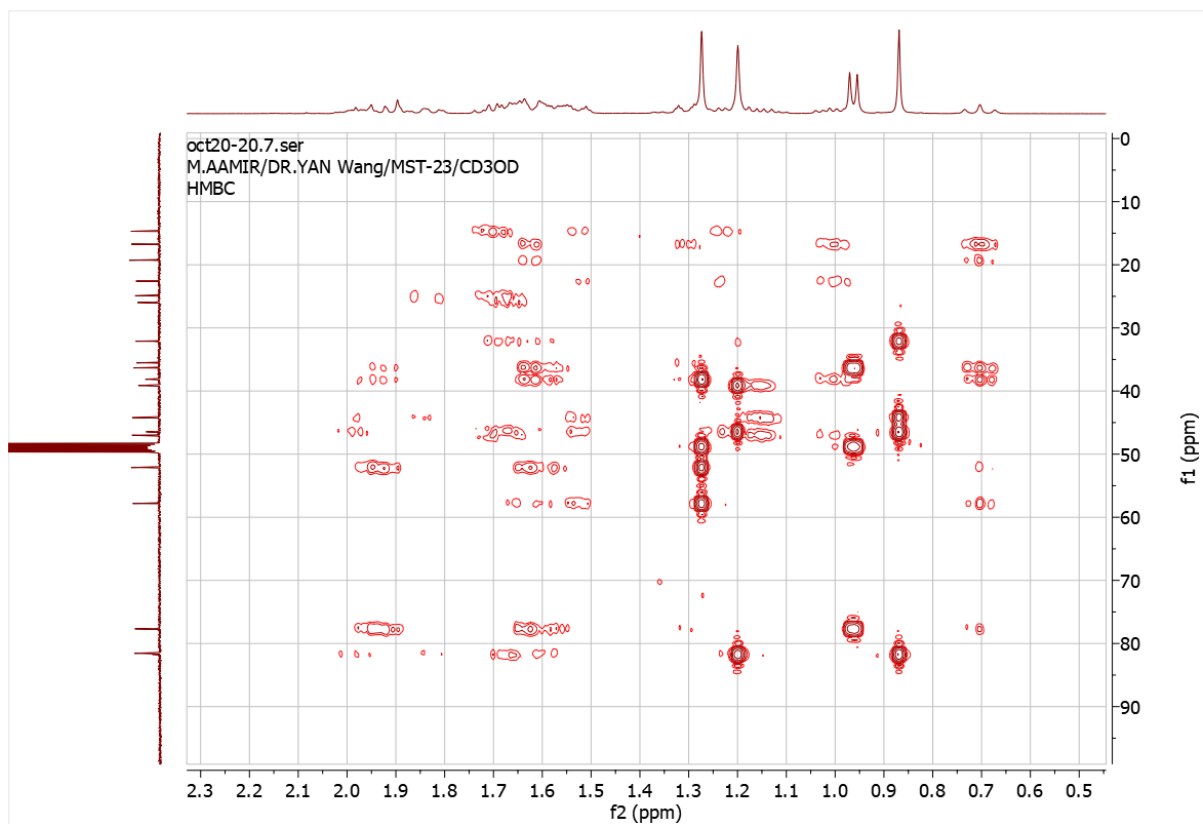

Figure S60. HMBC spectrum-2 of compound **5**

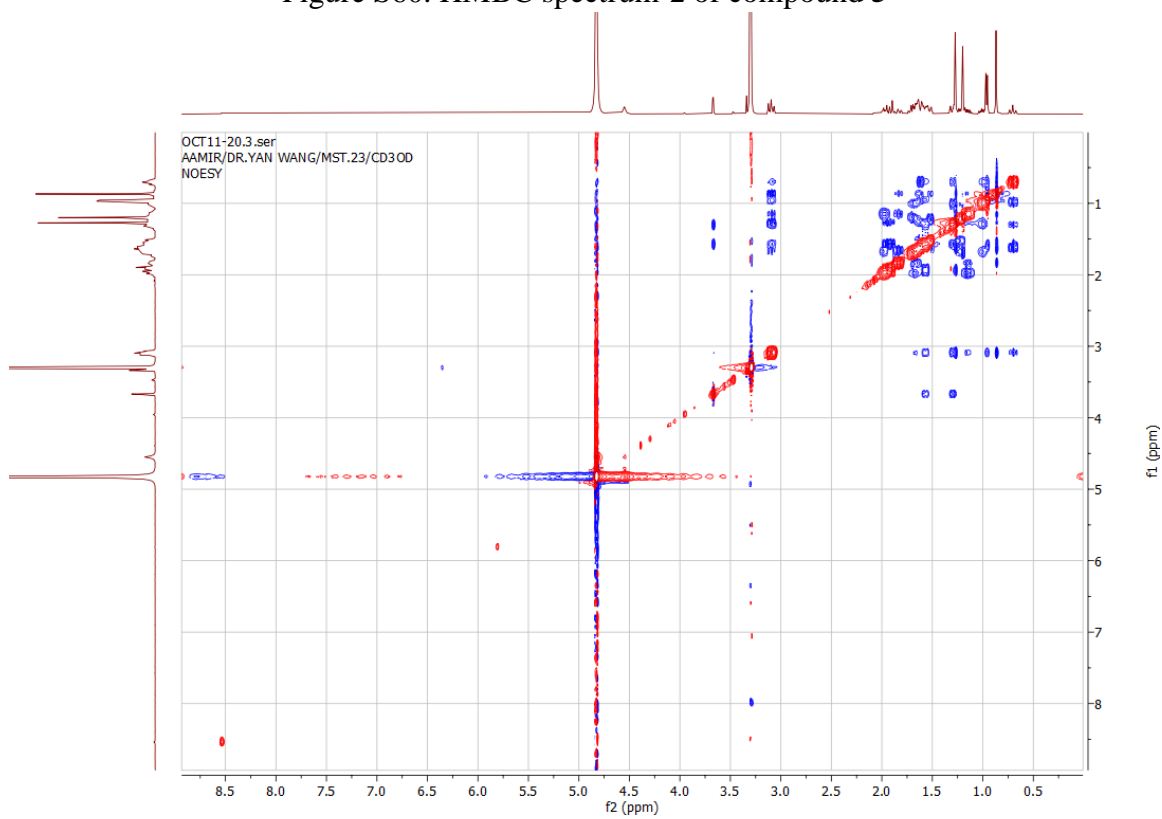

Figure S61. NOESY spectrum-1 of compound **5**

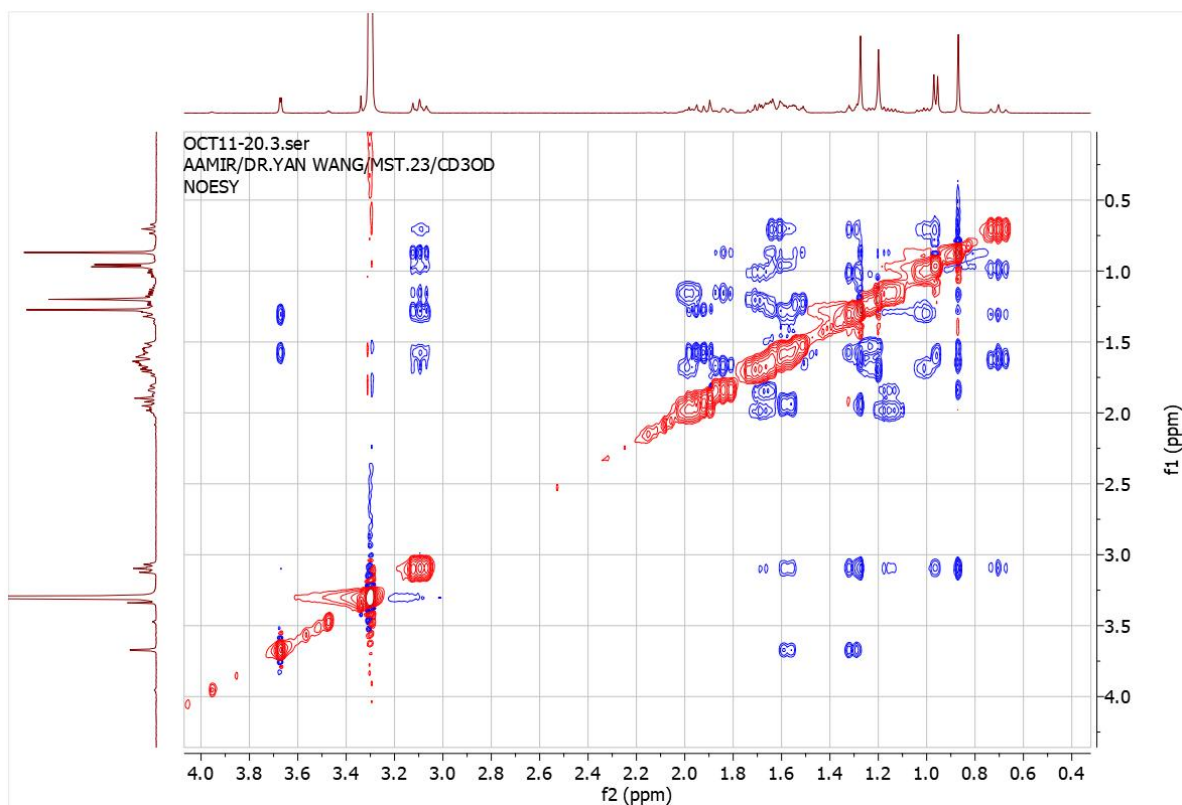

Figure S62. NOESY spectrum-2 of compound **5**

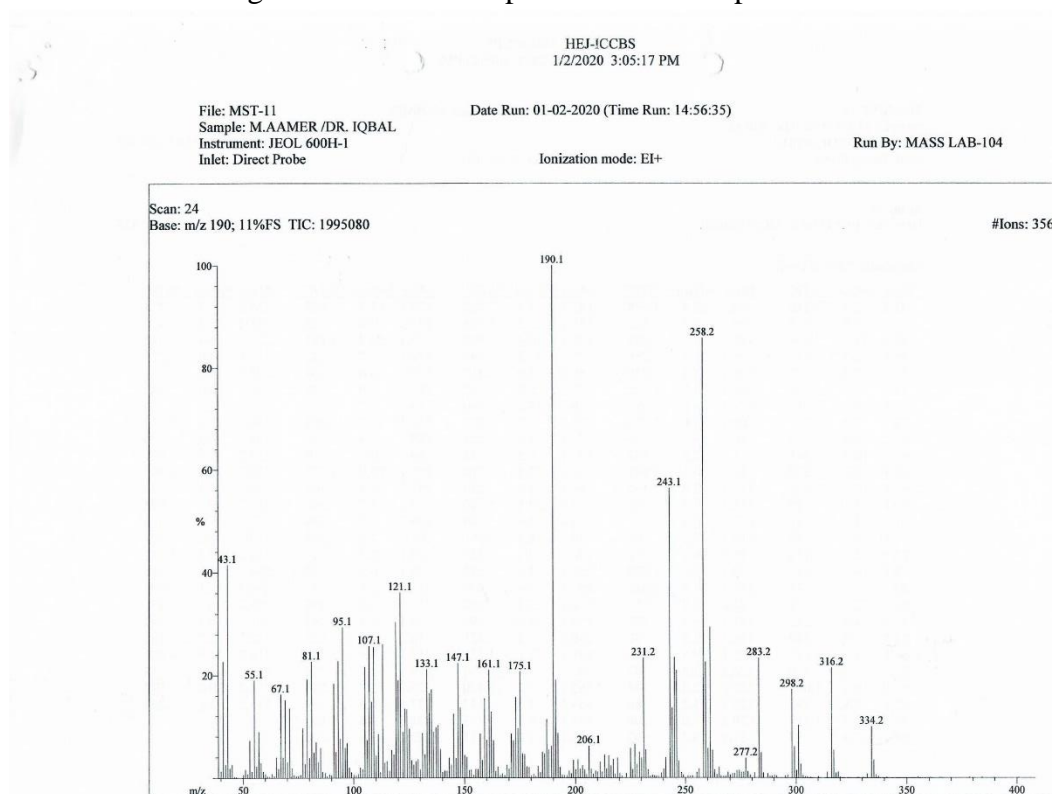

Figure S63. EI-MS spectrum of compound **6**

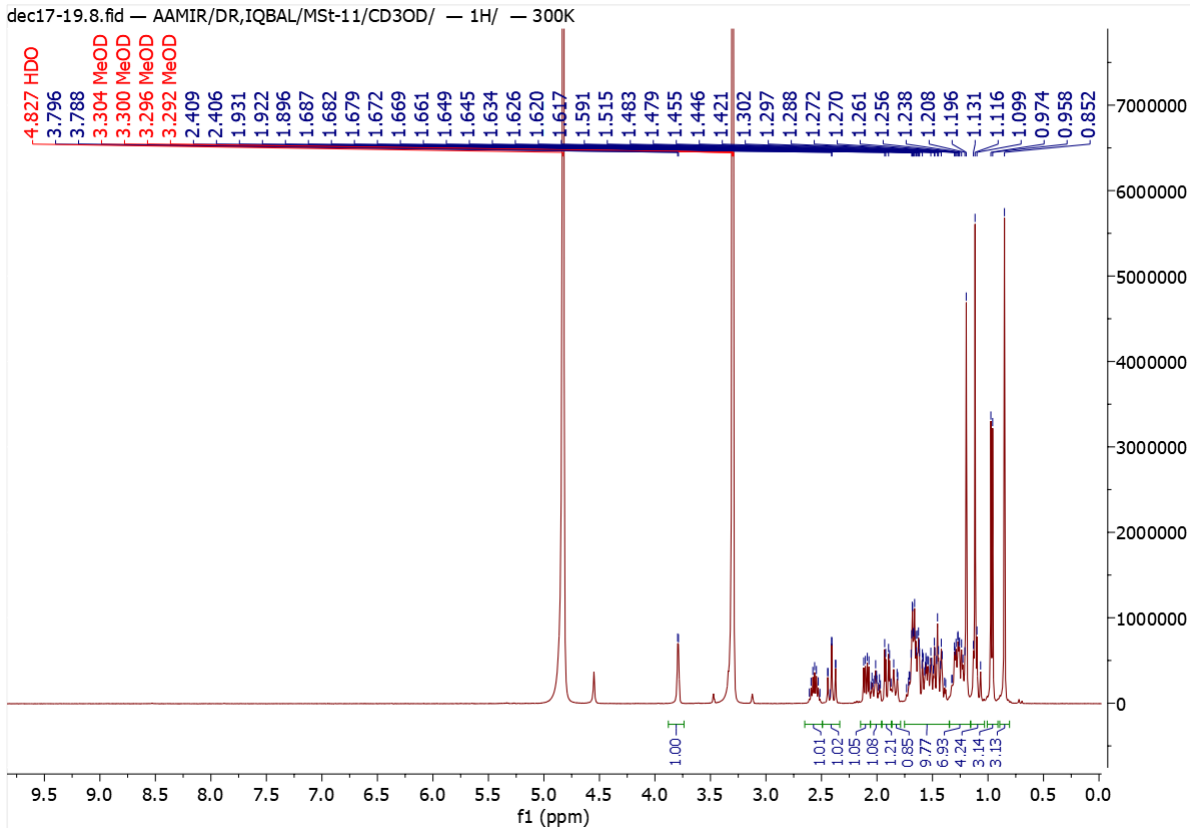

Figure S64. <sup>1</sup>H NMR spectrum-1 of compound **6** (400 MHz, CD<sub>3</sub>OD)

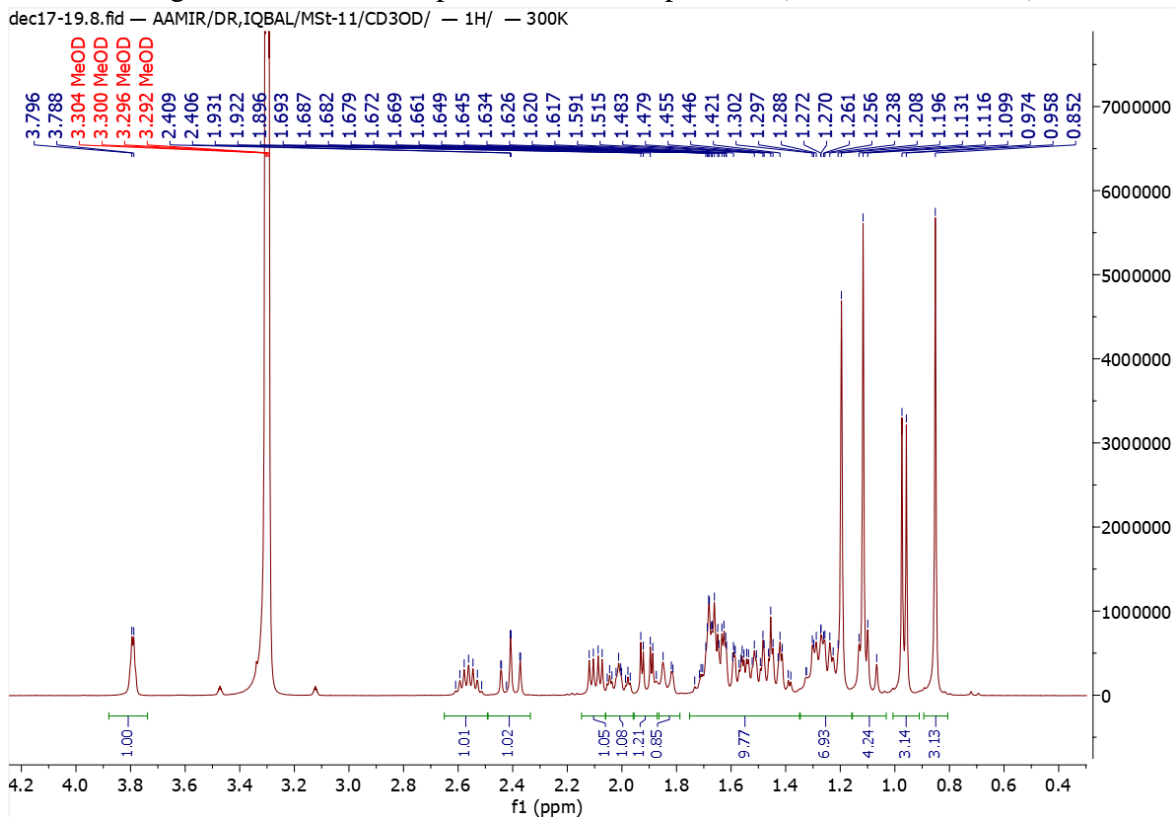

Figure S65. <sup>1</sup>H NMR spectrum-2 of compound **6** (400 MHz, CD<sub>3</sub>OD)

MST-11 (C13, AND 2D).14.fid — AAMIR/DR.WANG YAN/MST-11/CD3OD — B.B

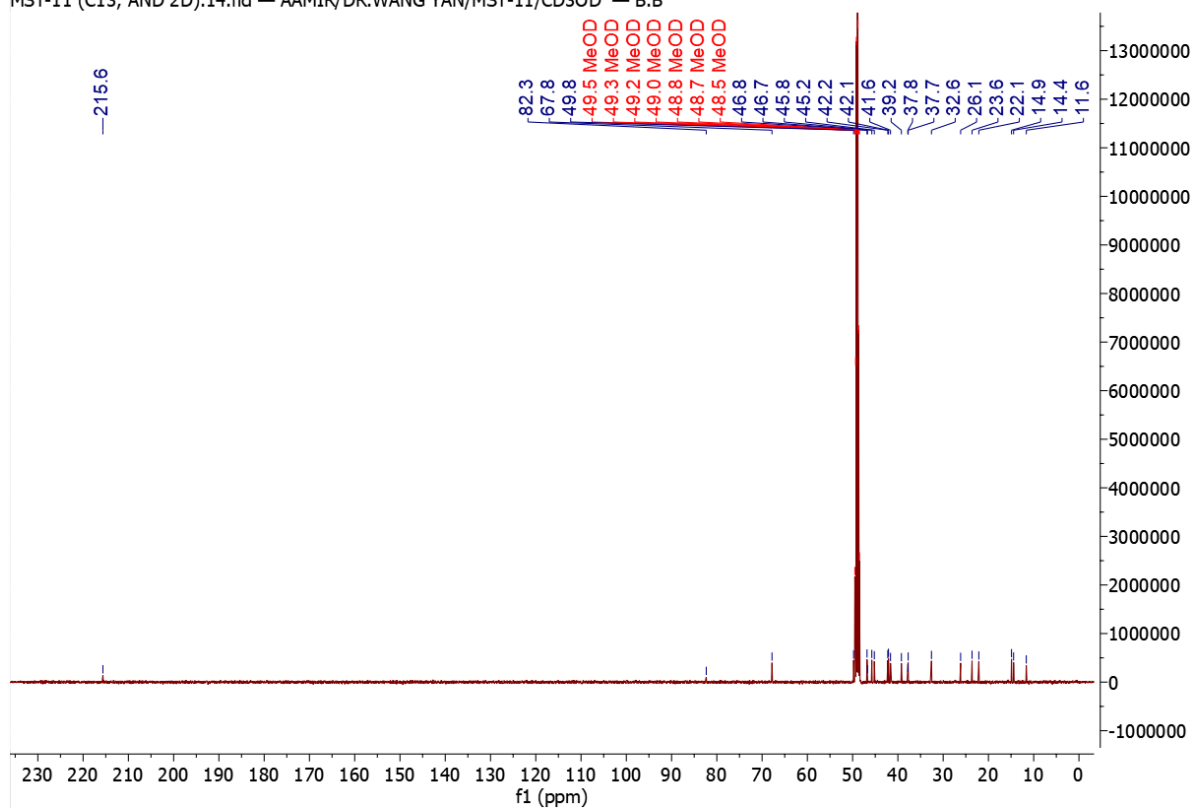

Figure S66.  $^{13}\text{C}$  NMR spectrum-1 of compound **6** (125 MHz,  $\text{CD}_3\text{OD}$ )

MST-11 (C13, AND 2D).14.fid — AAMIR/DR.WANG YAN/MST-11/CD3OD — B.B

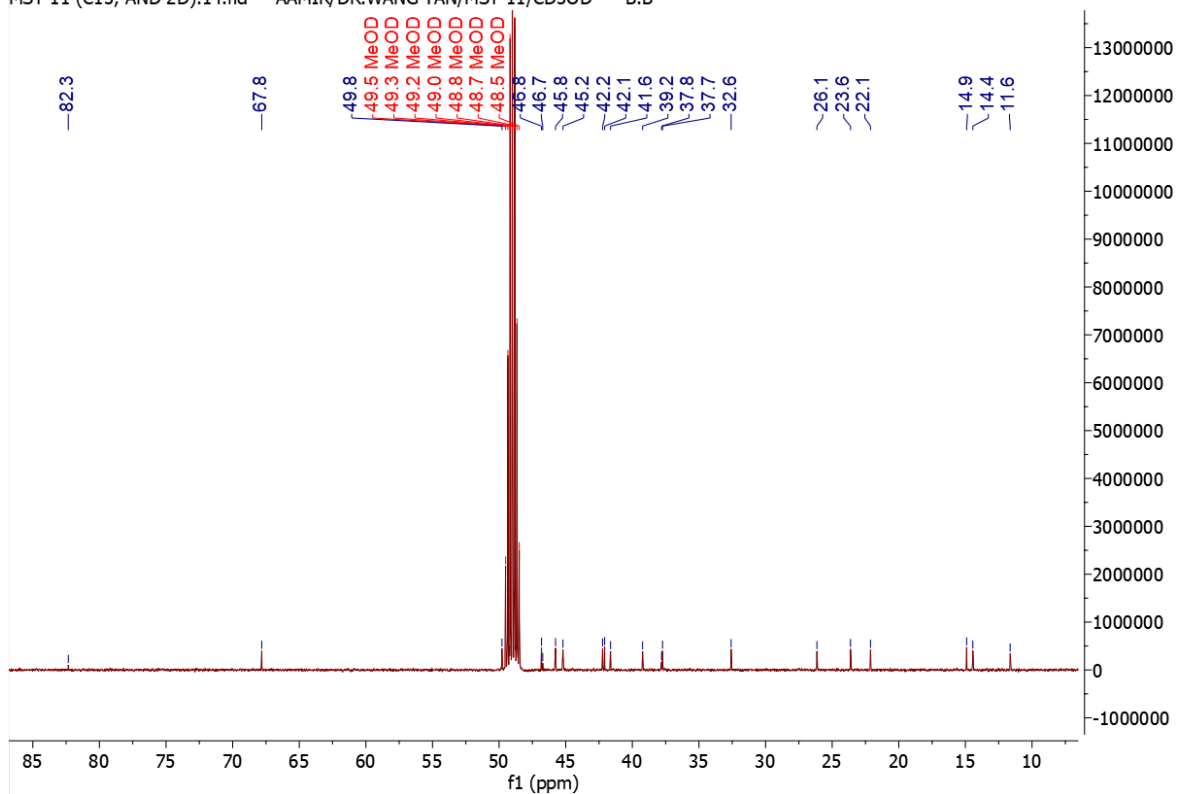

Figure S67.  $^{13}\text{C}$  NMR spectrum-2 of compound **6** (125 MHz,  $\text{CD}_3\text{OD}$ )

HEJ-ICCBS  
2/26/2019 4:09:32 PM

File: 14-ST-CB  
Sample: DR. YAN WANG /DR. IQBAL  
Instrument: JEOL JMS600H-1

Date Run: 02-26-2019 (Time Run: 16:00:23)

Run By: HEJ-104

Ionization mode: EI+

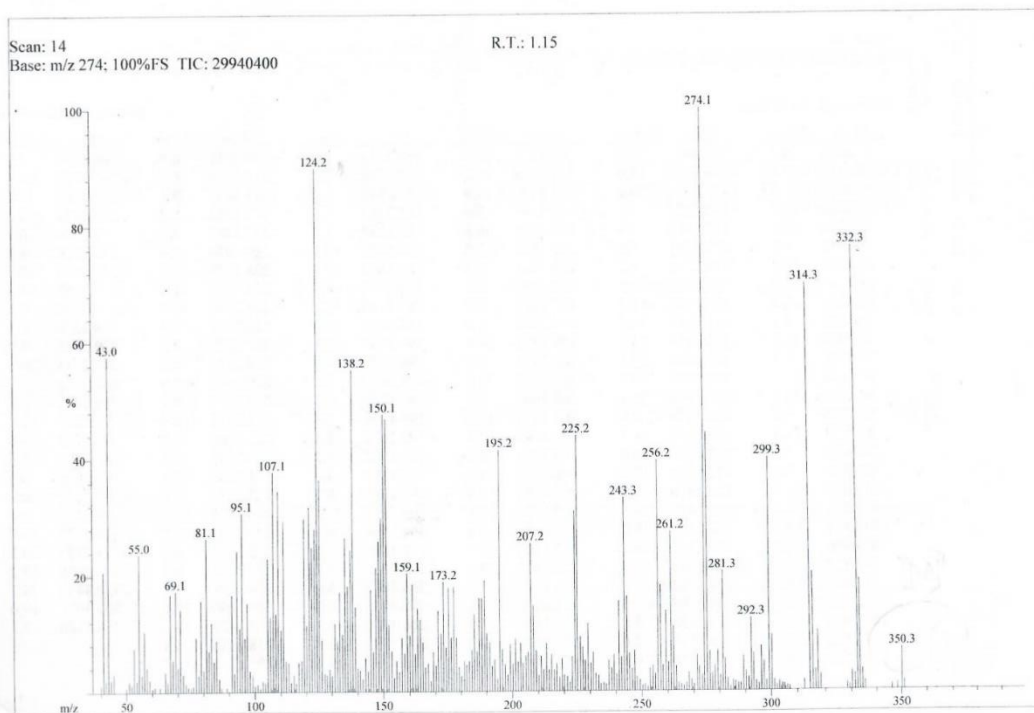

Figure S68. EI-MS spectrum of compound 7

| Mass     | Relative Intensity | Theoretical Mass | Delta [ppm] | Delta [mmu] | RDB  | Composition                                    |
|----------|--------------------|------------------|-------------|-------------|------|------------------------------------------------|
|          |                    | 288.2089         | -35.8       | -10.3       | 6.0  | C <sub>18</sub> H <sub>28</sub> O <sub>2</sub> |
|          |                    | 288.1878         | 37.5        | 10.8        | 11.0 | C <sub>22</sub> H <sub>24</sub>                |
| 289.2036 | 2.8                | 289.2015         | 7.4         | 2.1         | 1.5  | C <sub>15</sub> H <sub>29</sub> O <sub>5</sub> |
|          |                    | 289.1956         | 27.7        | 8.0         | 10.5 | C <sub>22</sub> H <sub>25</sub>                |
| 290.1837 | 2.5                | 290.1882         | -15.5       | -4.5        | 6.0  | C <sub>18</sub> H <sub>26</sub> O <sub>3</sub> |
|          |                    | 290.1729         | 37.1        | 10.8        | 2.0  | C <sub>14</sub> H <sub>26</sub> O <sub>6</sub> |
| 291.1950 | 1.0                | 291.1960         | -3.4        | -1.0        | 5.5  | C <sub>18</sub> H <sub>27</sub> O <sub>3</sub> |
| 292.1998 | 5.5                | 292.2038         | -13.8       | -4.0        | 5.0  | C <sub>18</sub> H <sub>28</sub> O <sub>3</sub> |
|          |                    | 292.1886         | 38.5        | 11.2        | 1.0  | C <sub>14</sub> H <sub>28</sub> O <sub>6</sub> |
| 293.2016 | 2.5                | 293.1964         | 17.7        | 5.2         | 0.5  | C <sub>14</sub> H <sub>29</sub> O <sub>6</sub> |
|          |                    | 293.2117         | -34.4       | -10.1       | 4.5  | C <sub>18</sub> H <sub>29</sub> O <sub>3</sub> |
|          |                    | 293.1905         | 37.7        | 11.1        | 9.5  | C <sub>21</sub> H <sub>25</sub> O <sub>1</sub> |
| 294.1993 | 3.6                | 294.1984         | 3.3         | 1.0         | 9.0  | C <sub>21</sub> H <sub>26</sub> O <sub>1</sub> |
|          |                    | 294.2042         | -16.6       | -4.9        | 0.0  | C <sub>14</sub> H <sub>26</sub> O <sub>6</sub> |
| 295.1953 | 2.4                | 295.1909         | 14.9        | 4.4         | 4.5  | C <sub>17</sub> H <sub>27</sub> O <sub>4</sub> |
|          |                    | 295.2062         | -36.8       | -10.9       | 8.5  | C <sub>21</sub> H <sub>27</sub> O <sub>1</sub> |
| 296.2178 | 44.8               | 296.2140         | 12.9        | 3.8         | 8.0  | C <sub>21</sub> H <sub>28</sub> O <sub>1</sub> |
| 297.2143 | 15.1               | 297.2218         | -25.3       | -7.5        | 7.5  | C <sub>21</sub> H <sub>29</sub> O <sub>1</sub> |
|          |                    | 297.2066         | 26.0        | 7.7         | 3.5  | C <sub>17</sub> H <sub>29</sub> O <sub>4</sub> |
| 298.2207 | 5.9                | 298.2144         | 21.2        | 6.3         | 3.0  | C <sub>17</sub> H <sub>30</sub> O <sub>4</sub> |
|          |                    | 298.2297         | -30.0       | -8.9        | 7.0  | C <sub>21</sub> H <sub>30</sub> O <sub>1</sub> |
| 299.2063 | 59.2               | 299.2011         | 17.4        | 5.2         | 7.5  | C <sub>20</sub> H <sub>27</sub> O <sub>2</sub> |
| 300.2086 | 13.1               | 300.2089         | -1.2        | -0.4        | 7.0  | C <sub>20</sub> H <sub>28</sub> O <sub>2</sub> |
| 301.2115 | 2.9                | 301.2168         | -17.3       | -5.2        | 6.5  | C <sub>20</sub> H <sub>28</sub> O <sub>2</sub> |
|          |                    | 301.2015         | 33.3        | 10.0        | 2.5  | C <sub>20</sub> H <sub>29</sub> O <sub>2</sub> |
| 302.2045 | 0.9                | 302.2035         | 3.5         | 1.1         | 11.0 | C <sub>16</sub> H <sub>29</sub> O <sub>5</sub> |
|          |                    | 302.2093         | -15.9       | -4.8        | 2.0  | C <sub>23</sub> H <sub>26</sub>                |
| 303.2086 | 1.1                | 303.2113         | -8.9        | -2.7        | 10.5 | C <sub>16</sub> H <sub>30</sub> O <sub>5</sub> |
|          |                    | 303.2171         | -28.3       | -8.6        | 1.5  | C <sub>23</sub> H <sub>27</sub>                |
| 310.1874 | 1.5                | 310.1933         | -18.9       | -5.9        | 9.0  | C <sub>16</sub> H <sub>31</sub> O <sub>5</sub> |
|          |                    | 310.1780         | 30.3        | 9.4         | 5.0  | C <sub>21</sub> H <sub>26</sub> O <sub>2</sub> |
|          |                    | 310.1992         | -37.8       | -11.7       | 0.0  | C <sub>17</sub> H <sub>26</sub> O <sub>5</sub> |
| 311.2007 | 1.0                | 311.2011         | -1.3        | -0.4        | 8.5  | C <sub>14</sub> H <sub>30</sub> O <sub>2</sub> |
| 312.2026 | 5.9                | 312.2089         | -20.4       | -6.4        | 8.0  | C <sub>21</sub> H <sub>27</sub> O <sub>2</sub> |
|          |                    | 312.1937         | 28.5        | 8.9         | 4.0  | C <sub>21</sub> H <sub>28</sub> O <sub>2</sub> |
| 313.2052 | 2.5                | 313.2015         | 11.7        | 3.7         | 3.5  | C <sub>17</sub> H <sub>28</sub> O <sub>5</sub> |
|          |                    | 313.1956         | 30.5        | 9.5         | 12.5 | C <sub>17</sub> H <sub>29</sub> O <sub>5</sub> |
|          |                    | 313.2168         | -37.0       | -11.6       | 7.5  | C <sub>24</sub> H <sub>25</sub>                |
| 314.2219 | 75.0               | 314.2246         | -8.4        | -2.6        | 7.0  | C <sub>21</sub> H <sub>29</sub> O <sub>3</sub> |
| 315.2170 | 19.4               | 315.2171         | -0.6        | -0.2        | 2.5  | C <sub>21</sub> H <sub>30</sub> O <sub>2</sub> |
|          |                    | 315.2113         | 18.0        | 5.7         | 11.5 | C <sub>17</sub> H <sub>31</sub> O <sub>5</sub> |
| 316.2283 | 4.4                | 316.2250         | 10.4        | 3.3         | 2.0  | C <sub>24</sub> H <sub>27</sub>                |
|          |                    | 316.2191         | 29.0        | 9.2         | 11.0 | C <sub>17</sub> H <sub>32</sub> O <sub>5</sub> |
|          |                    | 316.2402         | -37.8       | -12.0       | 6.0  | C <sub>24</sub> H <sub>28</sub>                |
| 317.2079 | 8.1                | 317.2117         | -12.0       | -3.8        | 6.5  | C <sub>21</sub> H <sub>32</sub> O <sub>2</sub> |
|          |                    | 317.1964         | 36.1        | 11.5        | 2.5  | C <sub>20</sub> H <sub>29</sub> O <sub>3</sub> |
| 318.2078 | 1.6                | 318.2042         | 11.3        | 3.6         | 2.0  | C <sub>16</sub> H <sub>29</sub> O <sub>6</sub> |
|          |                    | 318.1984         | 29.8        | 9.5         | 11.0 | C <sub>16</sub> H <sub>30</sub> O <sub>6</sub> |
|          |                    | 318.2195         | -36.6       | -11.7       | 6.0  | C <sub>23</sub> H <sub>26</sub> O <sub>1</sub> |
| 328.2041 | 1.9                | 328.2038         | 0.7         | 0.2         | 8.0  | C <sub>20</sub> H <sub>30</sub> O <sub>3</sub> |
| 328.9966 | 0.9                | 328.9934         | 9.8         | 3.2         | 13.5 | C <sub>21</sub> H <sub>28</sub> O <sub>3</sub> |
|          |                    | 329.0027         | -18.7       | -6.1        | 26.5 | C <sub>15</sub> H <sub>5</sub> O <sub>9</sub>  |
|          |                    | 328.9875         | 27.7        | 9.1         | 22.5 | C <sub>26</sub> H <sub>1</sub> O <sub>1</sub>  |
|          |                    | 329.0086         | -36.5       | -12.0       | 17.5 | C <sub>22</sub> H <sub>1</sub> O <sub>4</sub>  |
| 330.2260 | 3.4                | 330.2195         | 19.6        | 6.5         | 7.0  | C <sub>19</sub> H <sub>5</sub> O <sub>6</sub>  |
|          |                    | 330.2348         | -26.6       | -8.8        | 11.0 | C <sub>21</sub> H <sub>30</sub> O <sub>3</sub> |
| 331.2197 | 1.1                | 331.2121         | 23.0        | 7.6         | 2.5  | C <sub>25</sub> H <sub>30</sub>                |
|          |                    | 331.2273         | -23.1       | -7.6        | 6.5  | C <sub>17</sub> H <sub>31</sub> O <sub>6</sub> |
| 332.2392 | 36.0               | 332.2351         | 12.2        | 4.1         | 6.0  | C <sub>21</sub> H <sub>31</sub> O <sub>3</sub> |
|          |                    | 332.2504         | -33.7       | -11.2       | 10.0 | C <sub>21</sub> H <sub>32</sub> O <sub>3</sub> |
| 333.2412 | 8.6                | 333.2430         | -5.3        | -1.8        | 5.5  | C <sub>25</sub> H <sub>32</sub>                |
| 334.2512 | 1.4                | 334.2508         | 1.3         | 0.4         | 5.0  | C <sub>21</sub> H <sub>33</sub> O <sub>3</sub> |
| 350.2434 | 2.1                | 350.2457         | -6.7        | -2.4        | 5.0  | C <sub>21</sub> H <sub>34</sub> O <sub>3</sub> |
|          |                    |                  |             |             |      | C <sub>21</sub> H <sub>34</sub> O <sub>4</sub> |

Figure S69. HREI-MS spectrum of compound 7



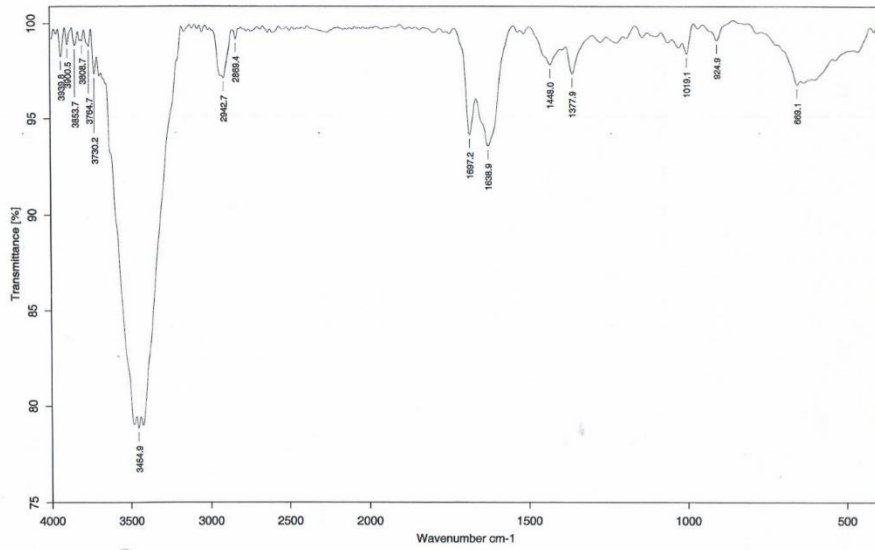

Sample : MST-14-ST-CB/Aamer/Dr.Yan      Spectrum : 14-ST-CB.0 (in D:\IRSTUDENT)  
 Measured : 17/11/2020 on VECTOR22      Technic : Liquid  
 Resolution : 2 cm-1 (10 scans)      Analyst : ZAINAB RIZVI

Figure S70. IR spectrum of compound 7

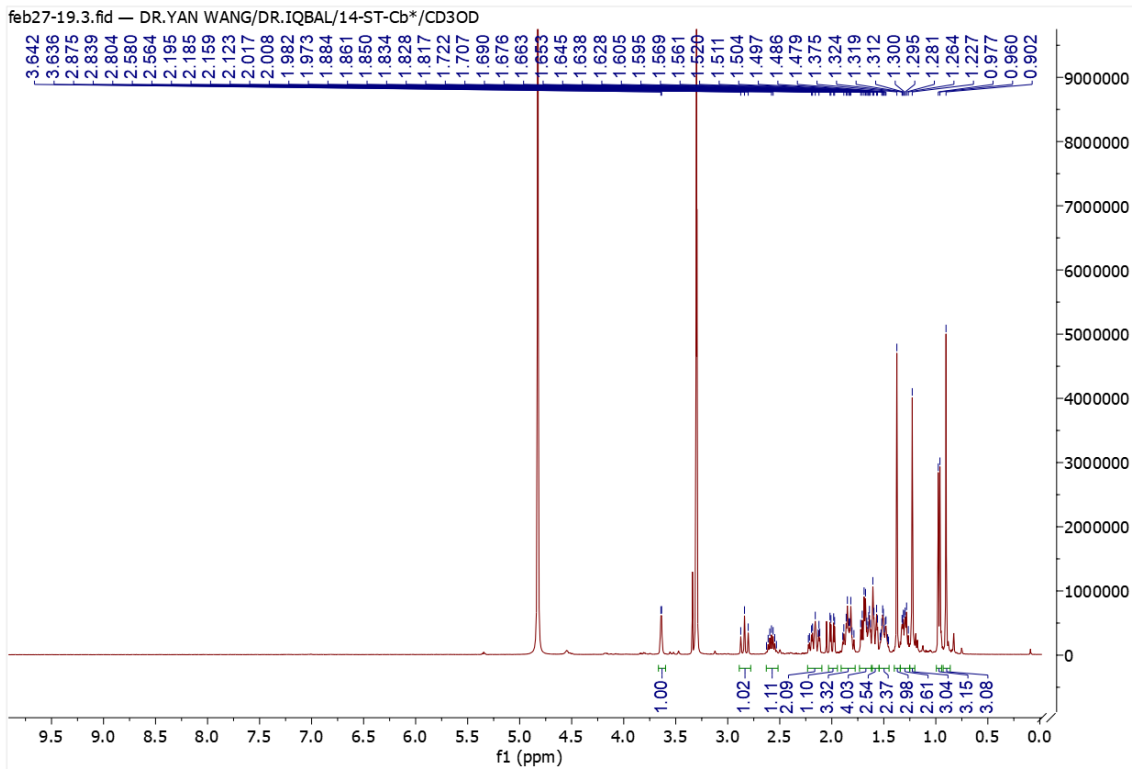

Figure S71. <sup>1</sup>H NMR spectrum-1 of compound 7 (400 MHz, CD<sub>3</sub>OD)

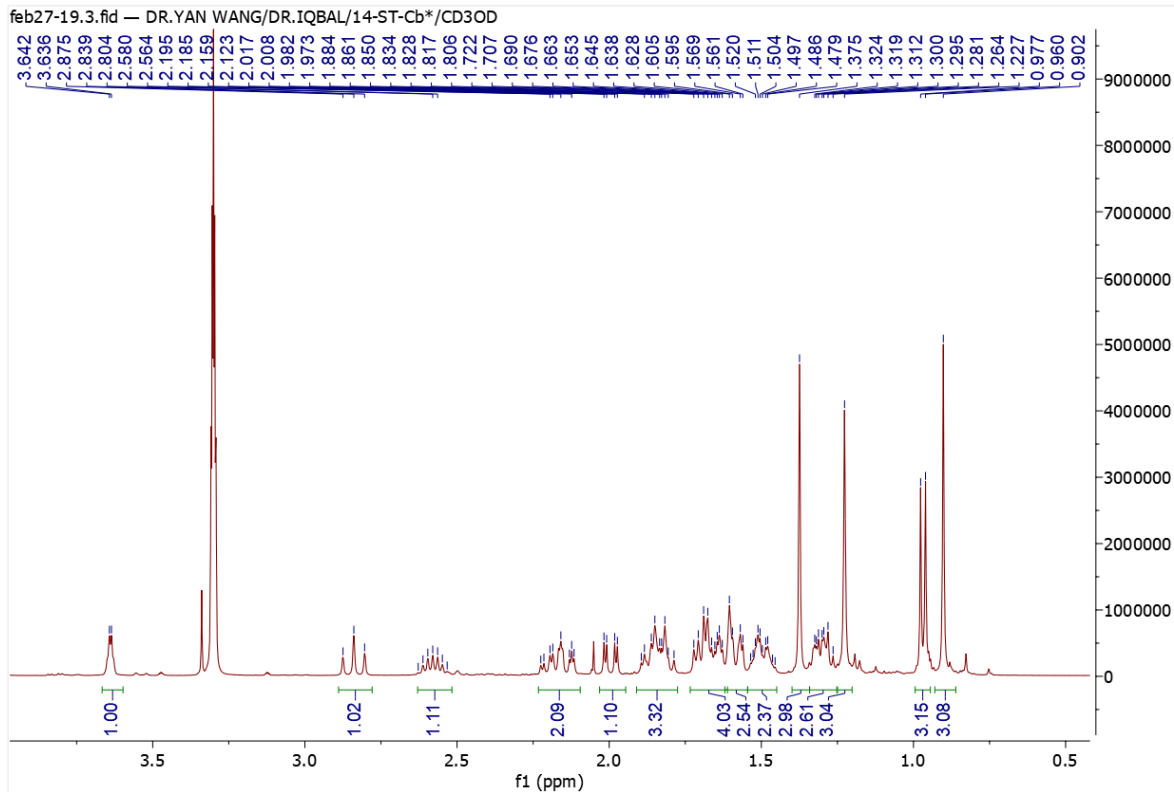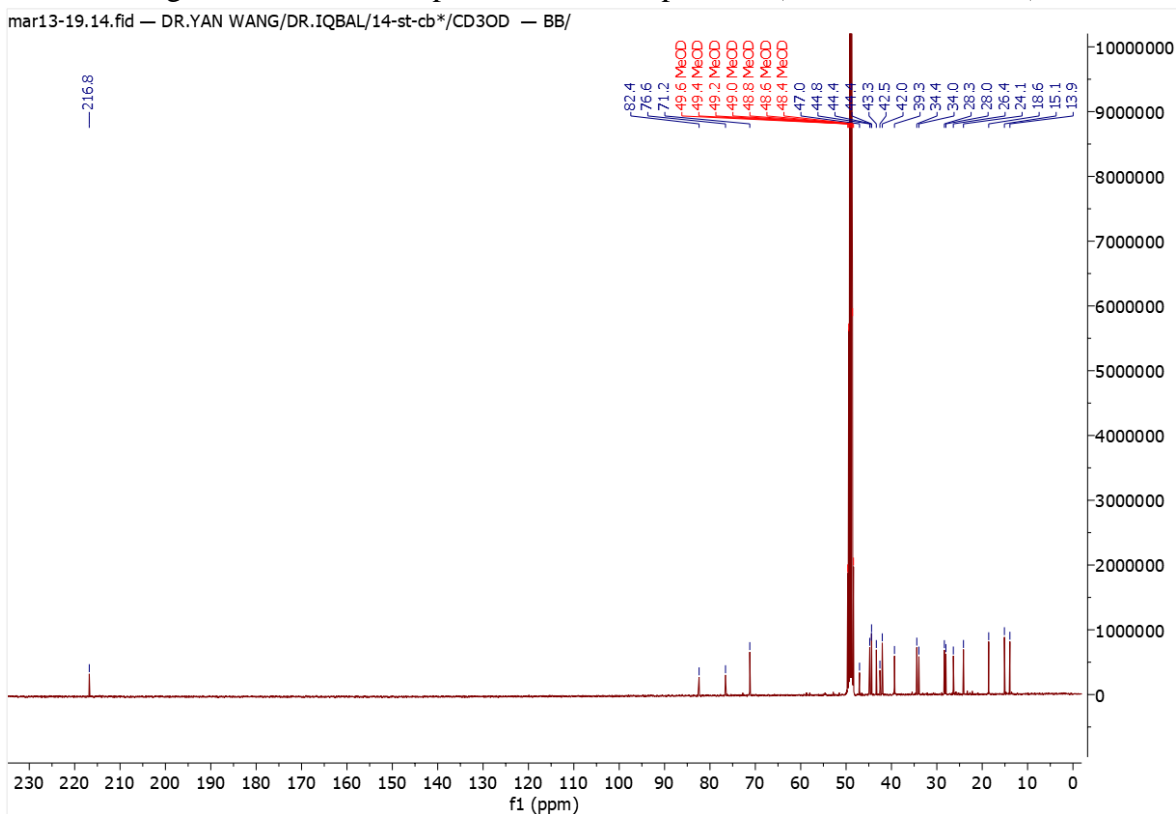

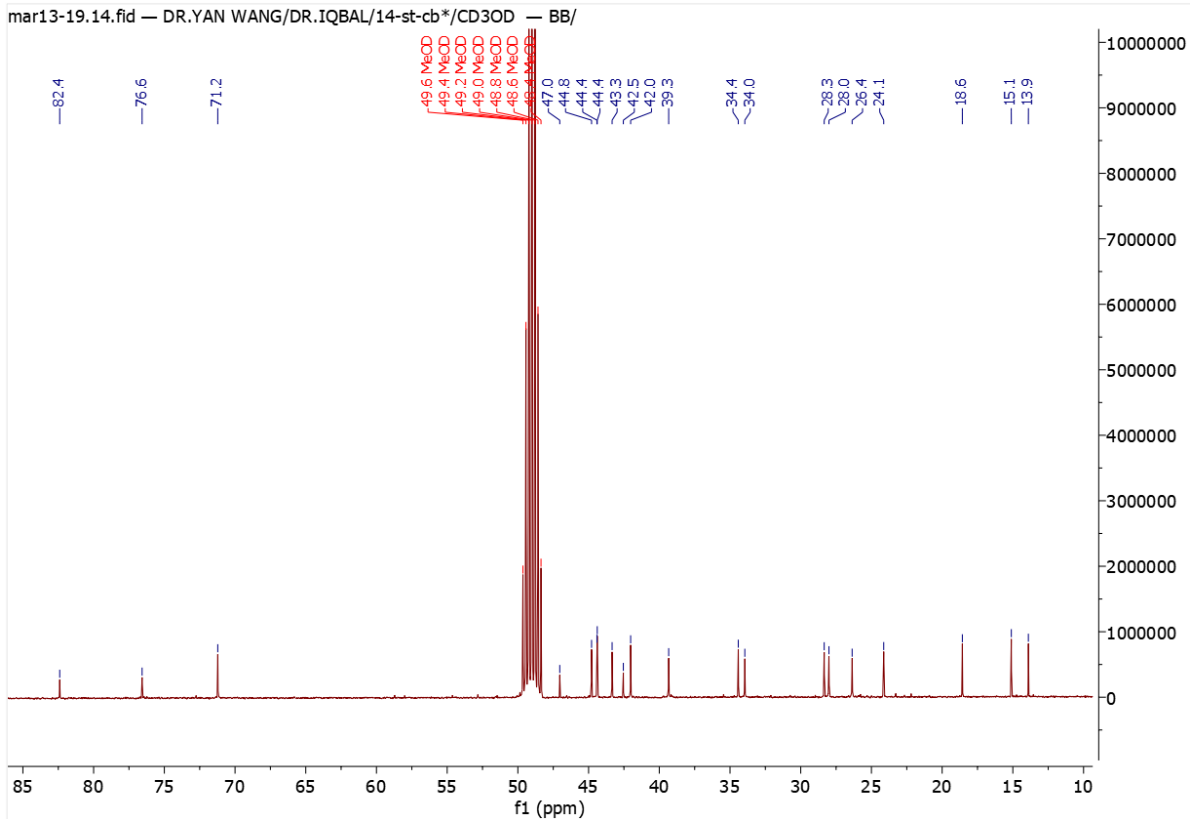

Figure S74.  $^{13}\text{C}$  NMR spectrum-2 of compound **7** (100 MHz,  $\text{CD}_3\text{OD}$ )

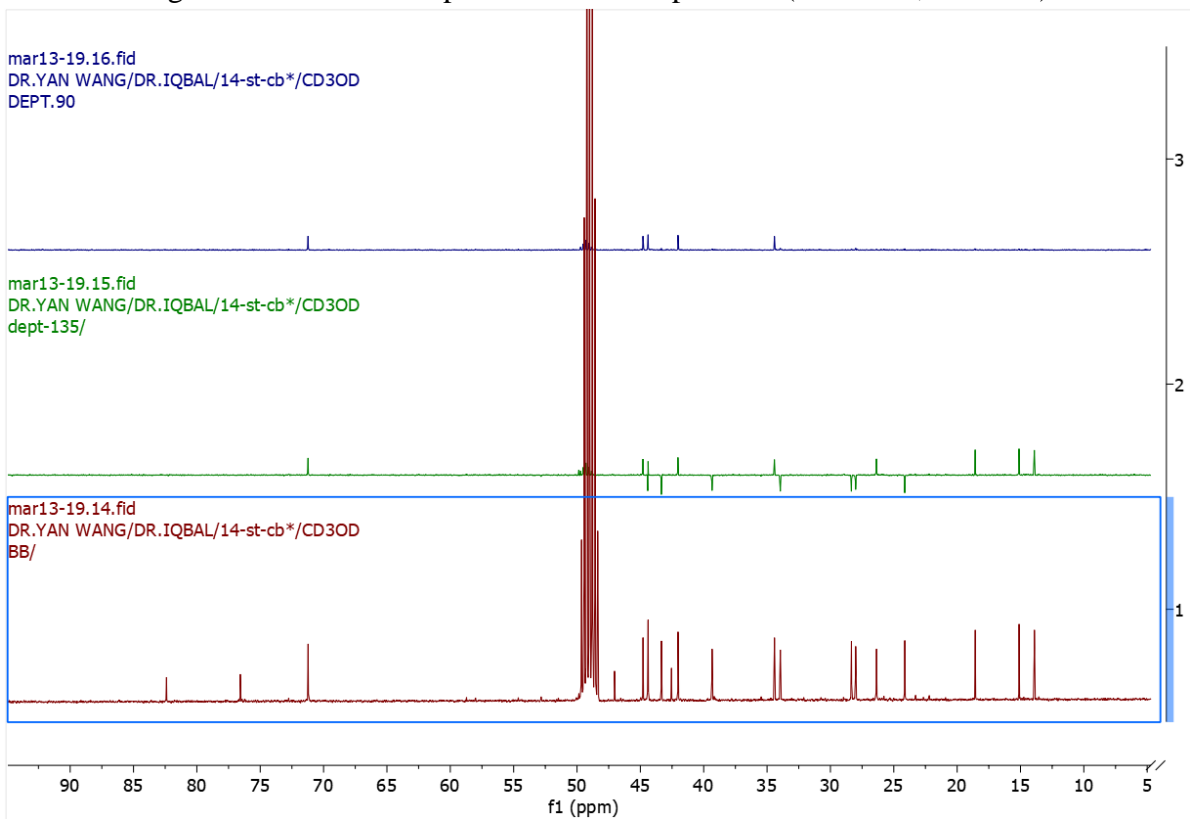

Figure S75. DEPT spectrum of compound **7**

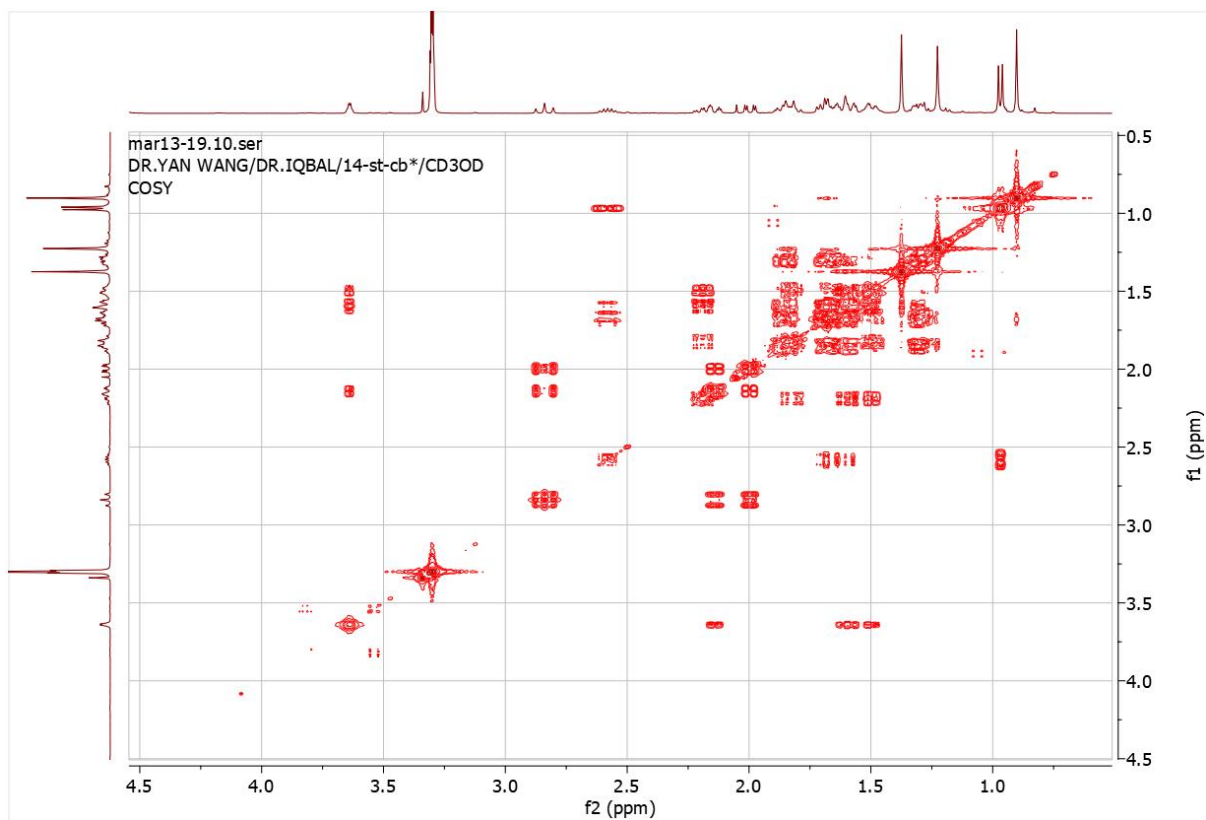

Figure S76.  $^1\text{H}$ - $^1\text{H}$  COSY spectrum of compound **7**

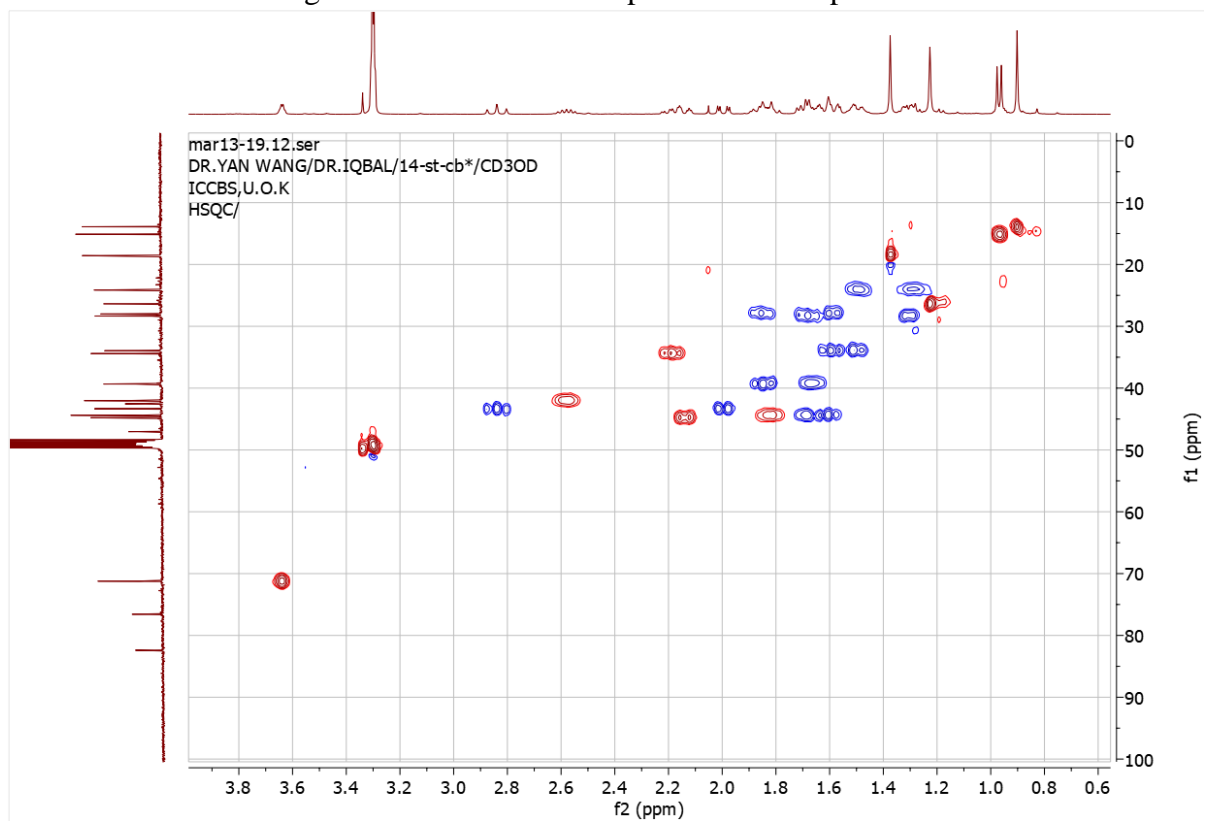

Figure S77. HSQC spectrum of compound **7**

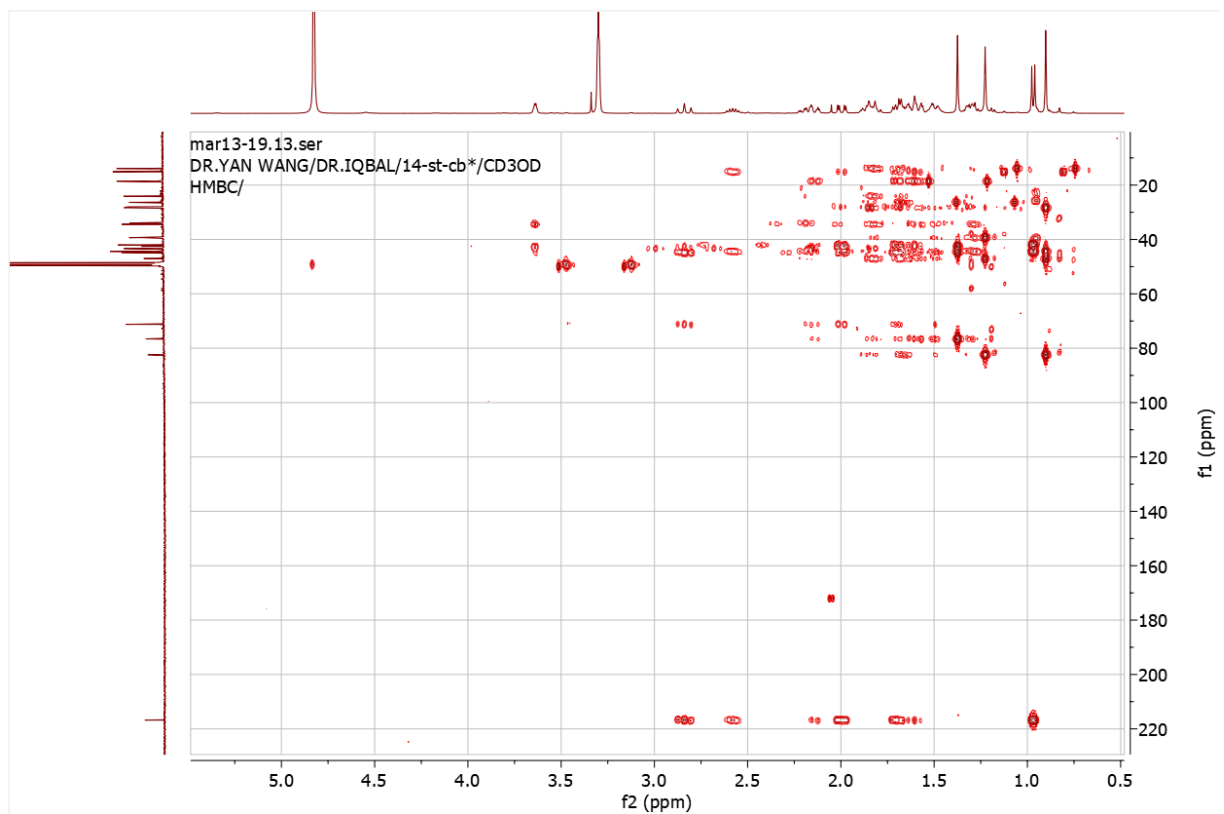

Figure S78. HMBC spectrum-1 of compound 7

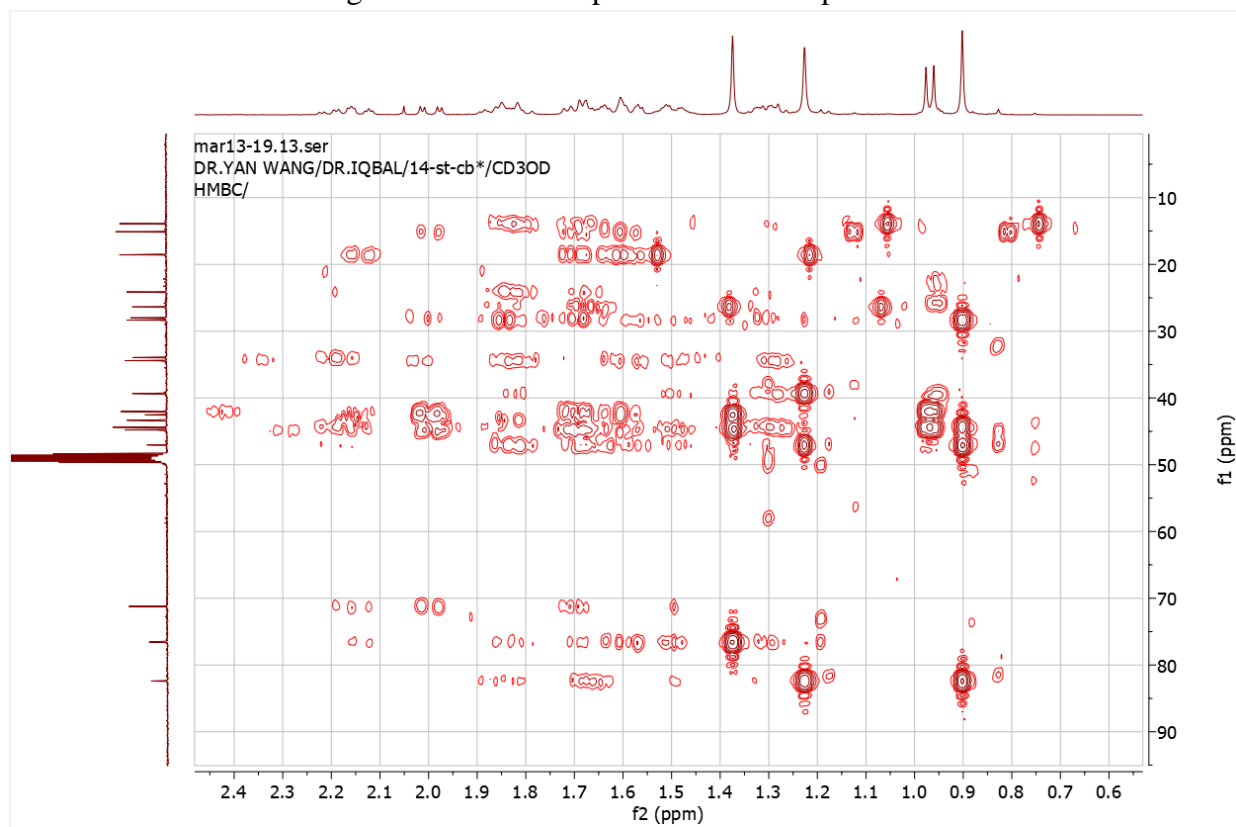

Figure S79. HMBC spectrum-2 of compound 7

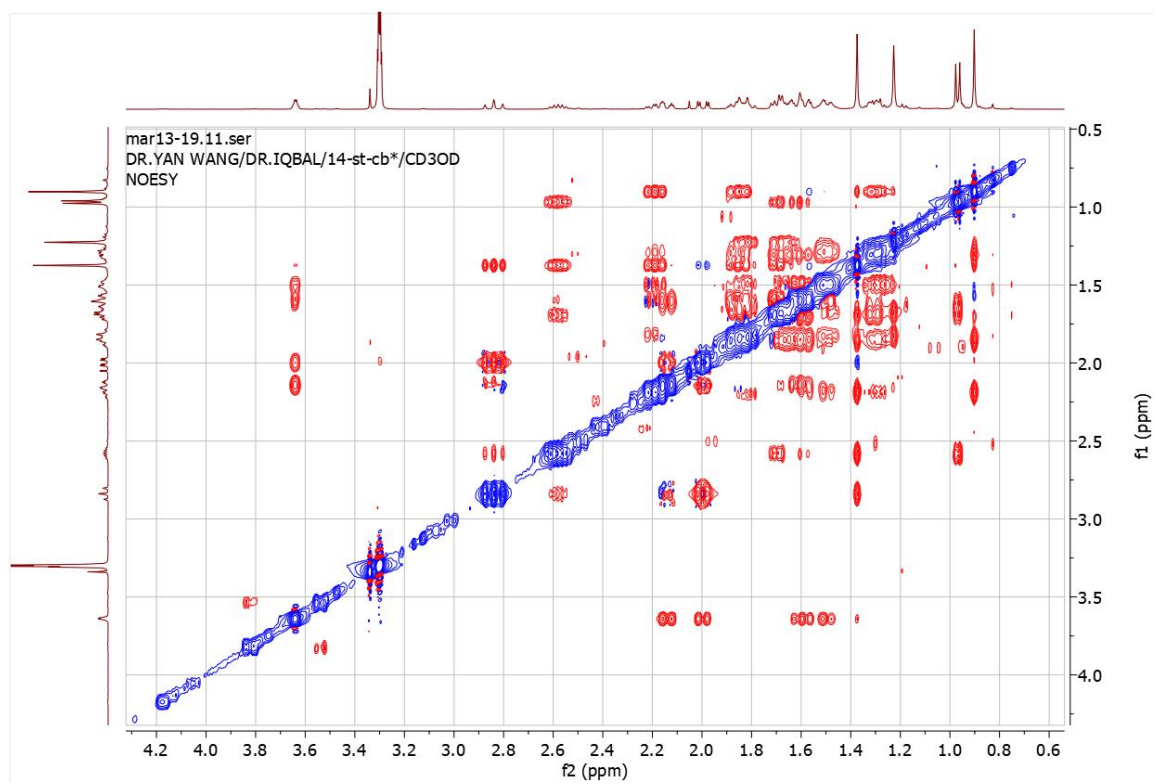

Figure S80. NOESY spectrum of compound **7**
